# Supplementary material for: First-principles investigation and device simulation of TlPbI3-based perovskite solar cells with machine learning-driven efficiency prediction
Source: Royal Society of Chemistry journal article supplement (doi:10.1039/d6ra01288d), 2026-04-07
Supplement: d6ra01288d2.xlsx [file d6ra01288d2.xlsx]

## Sheet: Sheet1
						Optimized Value												Optimized Value												Optimized Value
				thikness----		1.25 micro meter										thikness----		1.25 micro meter										thikness----		1.25 micro meter
TlPbI3	CdS			defect-------		1e14cm^3						TlPbI3	In3S2			defect-------		1e14cm^3						TlPbI3	SnS2			defect-------		1e14cm^3
TlPbI3	CdS			Bandgap-----		1.26eV						TlPbI3	In3S2			Bandgap-----		1.26eV						TlPbI3	SnS2			Bandgap-----		1.26eV
				Electron affinity---		3.750eV										Electron affinity---		3.750eV										Electron affinity---		3.750eV
				doping----------		1e16cm^3										doping----------		1e16cm^3										doping----------		1e16cm^3
				PCE---------		0.222										PCE---------		0.0947										PCE---------		0.2134
		5	4	4	5	4	3	3						5	4	4	5	4	3	3						5	4	4	5	4	3	3
		bandgap	E.affinity	doping	Thikness	defect	E.Mob	H.Mob	PCE					bandgap	E.affinity	doping	Thikness	defect	E.Mob	H.Mob	PCE					bandgap	E.affinity	doping	Thikness	defect	E.Mob	H.Mob	PCE
		1.06	3.65	1000000000000000	0.75	10000000000000	20	20	20.3441					1.06	3.65	1000000000000000	0.75	10000000000000	20	20	12.5203					1.06	3.65	1000000000000000	0.75	10000000000000	20	20	20.0926
		1.06	3.65	1000000000000000	0.75	10000000000000	20	60	20.3498					1.06	3.65	1000000000000000	0.75	10000000000000	20	60	12.5203					1.06	3.65	1000000000000000	0.75	10000000000000	20	60	20.0975
		1.06	3.65	1000000000000000	0.75	10000000000000	20	100	20.351					1.06	3.65	1000000000000000	0.75	10000000000000	20	100	12.5203					1.06	3.65	1000000000000000	0.75	10000000000000	20	100	20.0985
		1.06	3.65	1000000000000000	0.75	10000000000000	60	20	20.3939					1.06	3.65	1000000000000000	0.75	10000000000000	60	20	12.6128					1.06	3.65	1000000000000000	0.75	10000000000000	60	20	20.1451
		1.06	3.65	1000000000000000	0.75	10000000000000	60	60	20.4002					1.06	3.65	1000000000000000	0.75	10000000000000	60	60	12.6128					1.06	3.65	1000000000000000	0.75	10000000000000	60	60	20.1505
		1.06	3.65	1000000000000000	0.75	10000000000000	60	100	20.4014					1.06	3.65	1000000000000000	0.75	10000000000000	60	100	12.6128					1.06	3.65	1000000000000000	0.75	10000000000000	60	100	20.1515
		1.06	3.65	1000000000000000	0.75	10000000000000	100	20	20.4046					1.06	3.65	1000000000000000	0.75	10000000000000	100	20	12.6317					1.06	3.65	1000000000000000	0.75	10000000000000	100	20	20.1563
		1.06	3.65	1000000000000000	0.75	10000000000000	100	60	20.4111					1.06	3.65	1000000000000000	0.75	10000000000000	100	60	12.6317					1.06	3.65	1000000000000000	0.75	10000000000000	100	60	20.1618
		1.06	3.65	1000000000000000	0.75	10000000000000	100	100	20.4123					1.06	3.65	1000000000000000	0.75	10000000000000	100	100	12.6317					1.06	3.65	1000000000000000	0.75	10000000000000	100	100	20.1629
		1.06	3.65	1000000000000000	0.75	100000000000000	20	20	17.941					1.06	3.65	1000000000000000	0.75	100000000000000	20	20	5.23736					1.06	3.65	1000000000000000	0.75	100000000000000	20	20	17.0969
		1.06	3.65	1000000000000000	0.75	100000000000000	20	60	17.9432					1.06	3.65	1000000000000000	0.75	100000000000000	20	60	5.23723					1.06	3.65	1000000000000000	0.75	100000000000000	20	60	17.0981
		1.06	3.65	1000000000000000	0.75	100000000000000	20	100	17.9436					1.06	3.65	1000000000000000	0.75	100000000000000	20	100	5.2372					1.06	3.65	1000000000000000	0.75	100000000000000	20	100	17.0984
		1.06	3.65	1000000000000000	0.75	100000000000000	60	20	18.353					1.06	3.65	1000000000000000	0.75	100000000000000	60	20	5.46305					1.06	3.65	1000000000000000	0.75	100000000000000	60	20	17.5084
		1.06	3.65	1000000000000000	0.75	100000000000000	60	60	18.3561					1.06	3.65	1000000000000000	0.75	100000000000000	60	60	5.46306					1.06	3.65	1000000000000000	0.75	100000000000000	60	60	17.5104
		1.06	3.65	1000000000000000	0.75	100000000000000	60	100	18.3567					1.06	3.65	1000000000000000	0.75	100000000000000	60	100	5.46306					1.06	3.65	1000000000000000	0.75	100000000000000	60	100	17.5108
		1.06	3.65	1000000000000000	0.75	100000000000000	100	20	18.445					1.06	3.65	1000000000000000	0.75	100000000000000	100	20	5.51219					1.06	3.65	1000000000000000	0.75	100000000000000	100	20	17.5995
		1.06	3.65	1000000000000000	0.75	100000000000000	100	60	18.4483					1.06	3.65	1000000000000000	0.75	100000000000000	100	60	5.51223					1.06	3.65	1000000000000000	0.75	100000000000000	100	60	17.6017
		1.06	3.65	1000000000000000	0.75	100000000000000	100	100	18.449					1.06	3.65	1000000000000000	0.75	100000000000000	100	100	5.51224					1.06	3.65	1000000000000000	0.75	100000000000000	100	100	17.6021
		1.06	3.65	1000000000000000	0.75	1000000000000000	20	20	11.5423					1.06	3.65	1000000000000000	0.75	1000000000000000	20	20	1.30682					1.06	3.65	1000000000000000	0.75	1000000000000000	20	20	10.5188
		1.06	3.65	1000000000000000	0.75	1000000000000000	20	60	11.5386					1.06	3.65	1000000000000000	0.75	1000000000000000	20	60	1.30703					1.06	3.65	1000000000000000	0.75	1000000000000000	20	60	10.5156
		1.06	3.65	1000000000000000	0.75	1000000000000000	20	100	11.5378					1.06	3.65	1000000000000000	0.75	1000000000000000	20	100	1.30708					1.06	3.65	1000000000000000	0.75	1000000000000000	20	100	10.515
		1.06	3.65	1000000000000000	0.75	1000000000000000	60	20	13.036					1.06	3.65	1000000000000000	0.75	1000000000000000	60	20	1.42264					1.06	3.65	1000000000000000	0.75	1000000000000000	60	20	11.8912
		1.06	3.65	1000000000000000	0.75	1000000000000000	60	60	13.0342					1.06	3.65	1000000000000000	0.75	1000000000000000	60	60	1.4224					1.06	3.65	1000000000000000	0.75	1000000000000000	60	60	11.8898
		1.06	3.65	1000000000000000	0.75	1000000000000000	60	100	13.0338					1.06	3.65	1000000000000000	0.75	1000000000000000	60	100	1.42235					1.06	3.65	1000000000000000	0.75	1000000000000000	60	100	11.8895
		1.06	3.65	1000000000000000	0.75	1000000000000000	100	20	13.4257					1.06	3.65	1000000000000000	0.75	1000000000000000	100	20	1.48434					1.06	3.65	1000000000000000	0.75	1000000000000000	100	20	12.2498
		1.06	3.65	1000000000000000	0.75	1000000000000000	100	60	13.4246					1.06	3.65	1000000000000000	0.75	1000000000000000	100	60	1.48416					1.06	3.65	1000000000000000	0.75	1000000000000000	100	60	12.249
		1.06	3.65	1000000000000000	0.75	1000000000000000	100	100	13.4244					1.06	3.65	1000000000000000	0.75	1000000000000000	100	100	1.48412					1.06	3.65	1000000000000000	0.75	1000000000000000	100	100	12.2488
		1.06	3.65	1000000000000000	0.75	1e+16	20	20	5.00963					1.06	3.65	1000000000000000	0.75	1e+16	20	20	1.27465					1.06	3.65	1000000000000000	0.75	1e+16	20	20	4.65457
		1.06	3.65	1000000000000000	0.75	1e+16	20	60	5.00536					1.06	3.65	1000000000000000	0.75	1e+16	20	60	1.27499					1.06	3.65	1000000000000000	0.75	1e+16	20	60	4.65129
		1.06	3.65	1000000000000000	0.75	1e+16	20	100	5.0045					1.06	3.65	1000000000000000	0.75	1e+16	20	100	1.27506					1.06	3.65	1000000000000000	0.75	1e+16	20	100	4.65064
		1.06	3.65	1000000000000000	0.75	1e+16	60	20	6.92772					1.06	3.65	1000000000000000	0.75	1e+16	60	20	1.27403					1.06	3.65	1000000000000000	0.75	1e+16	60	20	6.34986
		1.06	3.65	1000000000000000	0.75	1e+16	60	60	6.92272					1.06	3.65	1000000000000000	0.75	1e+16	60	60	1.27439					1.06	3.65	1000000000000000	0.75	1e+16	60	60	6.34622
		1.06	3.65	1000000000000000	0.75	1e+16	60	100	6.92172					1.06	3.65	1000000000000000	0.75	1e+16	60	100	1.27446					1.06	3.65	1000000000000000	0.75	1e+16	60	100	6.34549
		1.06	3.65	1000000000000000	0.75	1e+16	100	20	7.63665					1.06	3.65	1000000000000000	0.75	1e+16	100	20	1.2739					1.06	3.65	1000000000000000	0.75	1e+16	100	20	6.97538
		1.06	3.65	1000000000000000	0.75	1e+16	100	60	7.632					1.06	3.65	1000000000000000	0.75	1e+16	100	60	1.27426					1.06	3.65	1000000000000000	0.75	1e+16	100	60	6.97215
		1.06	3.65	1000000000000000	0.75	1e+16	100	100	7.63107					1.06	3.65	1000000000000000	0.75	1e+16	100	100	1.27433					1.06	3.65	1000000000000000	0.75	1e+16	100	100	6.97151
		1.06	3.65	1000000000000000	1	10000000000000	20	20	21.2044					1.06	3.65	1000000000000000	1	10000000000000	20	20	12.0608					1.06	3.65	1000000000000000	1	10000000000000	20	20	20.8976
		1.06	3.65	1000000000000000	1	10000000000000	20	60	21.2136					1.06	3.65	1000000000000000	1	10000000000000	20	60	12.0607					1.06	3.65	1000000000000000	1	10000000000000	20	60	20.9053
		1.06	3.65	1000000000000000	1	10000000000000	20	100	21.2154					1.06	3.65	1000000000000000	1	10000000000000	20	100	12.0606					1.06	3.65	1000000000000000	1	10000000000000	20	100	20.9068
		1.06	3.65	1000000000000000	1	10000000000000	60	20	21.2741					1.06	3.65	1000000000000000	1	10000000000000	60	20	12.169					1.06	3.65	1000000000000000	1	10000000000000	60	20	20.9705
		1.06	3.65	1000000000000000	1	10000000000000	60	60	21.2841					1.06	3.65	1000000000000000	1	10000000000000	60	60	12.1689					1.06	3.65	1000000000000000	1	10000000000000	60	60	20.9788
		1.06	3.65	1000000000000000	1	10000000000000	60	100	21.2861					1.06	3.65	1000000000000000	1	10000000000000	60	100	12.1688					1.06	3.65	1000000000000000	1	10000000000000	60	100	20.9805
		1.06	3.65	1000000000000000	1	10000000000000	100	20	21.2891					1.06	3.65	1000000000000000	1	10000000000000	100	20	12.1911					1.06	3.65	1000000000000000	1	10000000000000	100	20	20.986
		1.06	3.65	1000000000000000	1	10000000000000	100	60	21.2994					1.06	3.65	1000000000000000	1	10000000000000	100	60	12.191					1.06	3.65	1000000000000000	1	10000000000000	100	60	20.9946
		1.06	3.65	1000000000000000	1	10000000000000	100	100	21.3014					1.06	3.65	1000000000000000	1	10000000000000	100	100	12.191					1.06	3.65	1000000000000000	1	10000000000000	100	100	20.9963
		1.06	3.65	1000000000000000	1	100000000000000	20	20	17.9815					1.06	3.65	1000000000000000	1	100000000000000	20	20	4.6874					1.06	3.65	1000000000000000	1	100000000000000	20	20	16.9802
		1.06	3.65	1000000000000000	1	100000000000000	20	60	17.9833					1.06	3.65	1000000000000000	1	100000000000000	20	60	4.68708					1.06	3.65	1000000000000000	1	100000000000000	20	60	16.9809
		1.06	3.65	1000000000000000	1	100000000000000	20	100	17.9837					1.06	3.65	1000000000000000	1	100000000000000	20	100	4.68701					1.06	3.65	1000000000000000	1	100000000000000	20	100	16.981
		1.06	3.65	1000000000000000	1	100000000000000	60	20	18.53					1.06	3.65	1000000000000000	1	100000000000000	60	20	4.94375					1.06	3.65	1000000000000000	1	100000000000000	60	20	17.5176
		1.06	3.65	1000000000000000	1	100000000000000	60	60	18.5337					1.06	3.65	1000000000000000	1	100000000000000	60	60	4.94369					1.06	3.65	1000000000000000	1	100000000000000	60	60	17.5196
		1.06	3.65	1000000000000000	1	100000000000000	60	100	18.5344					1.06	3.65	1000000000000000	1	100000000000000	60	100	4.94367					1.06	3.65	1000000000000000	1	100000000000000	60	100	17.52
		1.06	3.65	1000000000000000	1	100000000000000	100	20	18.6545					1.06	3.65	1000000000000000	1	100000000000000	100	20	5.00064					1.06	3.65	1000000000000000	1	100000000000000	100	20	17.6384
		1.06	3.65	1000000000000000	1	100000000000000	100	60	18.6587					1.06	3.65	1000000000000000	1	100000000000000	100	60	5.00065					1.06	3.65	1000000000000000	1	100000000000000	100	60	17.6409
		1.06	3.65	1000000000000000	1	100000000000000	100	100	18.6595					1.06	3.65	1000000000000000	1	100000000000000	100	100	5.00065					1.06	3.65	1000000000000000	1	100000000000000	100	100	17.6414
		1.06	3.65	1000000000000000	1	1000000000000000	20	20	10.8373					1.06	3.65	1000000000000000	1	1000000000000000	20	20	1.29407					1.06	3.65	1000000000000000	1	1000000000000000	20	20	9.84867
		1.06	3.65	1000000000000000	1	1000000000000000	20	60	10.8296					1.06	3.65	1000000000000000	1	1000000000000000	20	60	1.29481					1.06	3.65	1000000000000000	1	1000000000000000	20	60	9.84233
		1.06	3.65	1000000000000000	1	1000000000000000	20	100	10.8281					1.06	3.65	1000000000000000	1	1000000000000000	20	100	1.2949					1.06	3.65	1000000000000000	1	1000000000000000	20	100	9.84105
		1.06	3.65	1000000000000000	1	1000000000000000	60	20	12.575					1.06	3.65	1000000000000000	1	1000000000000000	60	20	1.2944					1.06	3.65	1000000000000000	1	1000000000000000	60	20	11.4284
		1.06	3.65	1000000000000000	1	1000000000000000	60	60	12.5705					1.06	3.65	1000000000000000	1	1000000000000000	60	60	1.29484					1.06	3.65	1000000000000000	1	1000000000000000	60	60	11.4249
		1.06	3.65	1000000000000000	1	1000000000000000	60	100	12.5696					1.06	3.65	1000000000000000	1	1000000000000000	60	100	1.29493					1.06	3.65	1000000000000000	1	1000000000000000	60	100	11.4242
		1.06	3.65	1000000000000000	1	1000000000000000	100	20	13.05					1.06	3.65	1000000000000000	1	1000000000000000	100	20	1.29448					1.06	3.65	1000000000000000	1	1000000000000000	100	20	11.8611
		1.06	3.65	1000000000000000	1	1000000000000000	100	60	13.0469					1.06	3.65	1000000000000000	1	1000000000000000	100	60	1.29491					1.06	3.65	1000000000000000	1	1000000000000000	100	60	11.8589
		1.06	3.65	1000000000000000	1	1000000000000000	100	100	13.0463					1.06	3.65	1000000000000000	1	1000000000000000	100	100	1.295					1.06	3.65	1000000000000000	1	1000000000000000	100	100	11.8584
		1.06	3.65	1000000000000000	1	1e+16	20	20	4.42352					1.06	3.65	1000000000000000	1	1e+16	20	20	1.27372					1.06	3.65	1000000000000000	1	1e+16	20	20	4.1412
		1.06	3.65	1000000000000000	1	1e+16	20	60	4.4179					1.06	3.65	1000000000000000	1	1e+16	20	60	1.27431					1.06	3.65	1000000000000000	1	1e+16	20	60	4.13699
		1.06	3.65	1000000000000000	1	1e+16	20	100	4.41677					1.06	3.65	1000000000000000	1	1e+16	20	100	1.27443					1.06	3.65	1000000000000000	1	1e+16	20	100	4.13615
		1.06	3.65	1000000000000000	1	1e+16	60	20	6.17018					1.06	3.65	1000000000000000	1	1e+16	60	20	1.27297					1.06	3.65	1000000000000000	1	1e+16	60	20	5.69613
		1.06	3.65	1000000000000000	1	1e+16	60	60	6.16184					1.06	3.65	1000000000000000	1	1e+16	60	60	1.27359					1.06	3.65	1000000000000000	1	1e+16	60	60	5.6893
		1.06	3.65	1000000000000000	1	1e+16	60	100	6.16017					1.06	3.65	1000000000000000	1	1e+16	60	100	1.27372					1.06	3.65	1000000000000000	1	1e+16	60	100	5.68808
		1.06	3.65	1000000000000000	1	1e+16	100	20	6.88796					1.06	3.65	1000000000000000	1	1e+16	100	20	1.27281					1.06	3.65	1000000000000000	1	1e+16	100	20	6.3323
		1.06	3.65	1000000000000000	1	1e+16	100	60	6.87954					1.06	3.65	1000000000000000	1	1e+16	100	60	1.27344					1.06	3.65	1000000000000000	1	1e+16	100	60	6.32641
		1.06	3.65	1000000000000000	1	1e+16	100	100	6.87784					1.06	3.65	1000000000000000	1	1e+16	100	100	1.27356					1.06	3.65	1000000000000000	1	1e+16	100	100	6.32523
		1.06	3.65	1000000000000000	1.25	10000000000000	20	20	21.5872					1.06	3.65	1000000000000000	1.25	10000000000000	20	20	11.4945					1.06	3.65	1000000000000000	1.25	10000000000000	20	20	21.235
		1.06	3.65	1000000000000000	1.25	10000000000000	20	60	21.5995					1.06	3.65	1000000000000000	1.25	10000000000000	20	60	11.4943					1.06	3.65	1000000000000000	1.25	10000000000000	20	60	21.2452
		1.06	3.65	1000000000000000	1.25	10000000000000	20	100	21.602					1.06	3.65	1000000000000000	1.25	10000000000000	20	100	11.4943					1.06	3.65	1000000000000000	1.25	10000000000000	20	100	21.2472
		1.06	3.65	1000000000000000	1.25	10000000000000	60	20	21.676					1.06	3.65	1000000000000000	1.25	10000000000000	60	20	11.6145					1.06	3.65	1000000000000000	1.25	10000000000000	60	20	21.3274
		1.06	3.65	1000000000000000	1.25	10000000000000	60	60	21.6898					1.06	3.65	1000000000000000	1.25	10000000000000	60	60	11.6143					1.06	3.65	1000000000000000	1.25	10000000000000	60	60	21.3387
		1.06	3.65	1000000000000000	1.25	10000000000000	60	100	21.6925					1.06	3.65	1000000000000000	1.25	10000000000000	60	100	11.6143					1.06	3.65	1000000000000000	1.25	10000000000000	60	100	21.3409
		1.06	3.65	1000000000000000	1.25	10000000000000	100	20	21.6953					1.06	3.65	1000000000000000	1.25	10000000000000	100	20	11.6392					1.06	3.65	1000000000000000	1.25	10000000000000	100	20	21.3472
		1.06	3.65	1000000000000000	1.25	10000000000000	100	60	21.7094					1.06	3.65	1000000000000000	1.25	10000000000000	100	60	11.639					1.06	3.65	1000000000000000	1.25	10000000000000	100	60	21.3588
		1.06	3.65	1000000000000000	1.25	10000000000000	100	100	21.7122					1.06	3.65	1000000000000000	1.25	10000000000000	100	100	11.639					1.06	3.65	1000000000000000	1.25	10000000000000	100	100	21.361
		1.06	3.65	1000000000000000	1.25	100000000000000	20	20	17.6987					1.06	3.65	1000000000000000	1.25	100000000000000	20	20	4.20268					1.06	3.65	1000000000000000	1.25	100000000000000	20	20	16.599
		1.06	3.65	1000000000000000	1.25	100000000000000	20	60	17.6994					1.06	3.65	1000000000000000	1.25	100000000000000	20	60	4.20206					1.06	3.65	1000000000000000	1.25	100000000000000	20	60	16.5984
		1.06	3.65	1000000000000000	1.25	100000000000000	20	100	17.6996					1.06	3.65	1000000000000000	1.25	100000000000000	20	100	4.20194					1.06	3.65	1000000000000000	1.25	100000000000000	20	100	16.5982
		1.06	3.65	1000000000000000	1.25	100000000000000	60	20	18.366					1.06	3.65	1000000000000000	1.25	100000000000000	60	20	4.4804					1.06	3.65	1000000000000000	1.25	100000000000000	60	20	17.2439
		1.06	3.65	1000000000000000	1.25	100000000000000	60	60	18.3695					1.06	3.65	1000000000000000	1.25	100000000000000	60	60	4.48021					1.06	3.65	1000000000000000	1.25	100000000000000	60	60	17.2455
		1.06	3.65	1000000000000000	1.25	100000000000000	60	100	18.3702					1.06	3.65	1000000000000000	1.25	100000000000000	60	100	4.48017					1.06	3.65	1000000000000000	1.25	100000000000000	60	100	17.2458
		1.06	3.65	1000000000000000	1.25	100000000000000	100	20	18.5196					1.06	3.65	1000000000000000	1.25	100000000000000	100	20	4.54284					1.06	3.65	1000000000000000	1.25	100000000000000	100	20	17.3911
		1.06	3.65	1000000000000000	1.25	100000000000000	100	60	18.5239					1.06	3.65	1000000000000000	1.25	100000000000000	100	60	4.54276					1.06	3.65	1000000000000000	1.25	100000000000000	100	60	17.3934
		1.06	3.65	1000000000000000	1.25	100000000000000	100	100	18.5248					1.06	3.65	1000000000000000	1.25	100000000000000	100	100	4.54275					1.06	3.65	1000000000000000	1.25	100000000000000	100	100	17.3939
		1.06	3.65	1000000000000000	1.25	1000000000000000	20	20	10.183					1.06	3.65	1000000000000000	1.25	1000000000000000	20	20	1.28778					1.06	3.65	1000000000000000	1.25	1000000000000000	20	20	9.24685
		1.06	3.65	1000000000000000	1.25	1000000000000000	20	60	10.1707					1.06	3.65	1000000000000000	1.25	1000000000000000	20	60	1.28849					1.06	3.65	1000000000000000	1.25	1000000000000000	20	60	9.23695
		1.06	3.65	1000000000000000	1.25	1000000000000000	20	100	10.1682					1.06	3.65	1000000000000000	1.25	1000000000000000	20	100	1.28864					1.06	3.65	1000000000000000	1.25	1000000000000000	20	100	9.23496
		1.06	3.65	1000000000000000	1.25	1000000000000000	60	20	12.0698					1.06	3.65	1000000000000000	1.25	1000000000000000	60	20	1.28767					1.06	3.65	1000000000000000	1.25	1000000000000000	60	20	10.9484
		1.06	3.65	1000000000000000	1.25	1000000000000000	60	60	12.0619					1.06	3.65	1000000000000000	1.25	1000000000000000	60	60	1.28839					1.06	3.65	1000000000000000	1.25	1000000000000000	60	60	10.9424
		1.06	3.65	1000000000000000	1.25	1000000000000000	60	100	12.0603					1.06	3.65	1000000000000000	1.25	1000000000000000	60	100	1.28853					1.06	3.65	1000000000000000	1.25	1000000000000000	60	100	10.9411
		1.06	3.65	1000000000000000	1.25	1000000000000000	100	20	12.6037					1.06	3.65	1000000000000000	1.25	1000000000000000	100	20	1.28765					1.06	3.65	1000000000000000	1.25	1000000000000000	100	20	11.4336
		1.06	3.65	1000000000000000	1.25	1000000000000000	100	60	12.5978					1.06	3.65	1000000000000000	1.25	1000000000000000	100	60	1.28836					1.06	3.65	1000000000000000	1.25	1000000000000000	100	60	11.4294
		1.06	3.65	1000000000000000	1.25	1000000000000000	100	100	12.5967					1.06	3.65	1000000000000000	1.25	1000000000000000	100	100	1.2885					1.06	3.65	1000000000000000	1.25	1000000000000000	100	100	11.4285
		1.06	3.65	1000000000000000	1.25	1e+16	20	20	4.11272					1.06	3.65	1000000000000000	1.25	1e+16	20	20	1.27311					1.06	3.65	1000000000000000	1.25	1e+16	20	20	3.86653
		1.06	3.65	1000000000000000	1.25	1e+16	20	60	4.10679					1.06	3.65	1000000000000000	1.25	1e+16	20	60	1.27395					1.06	3.65	1000000000000000	1.25	1e+16	20	60	3.86231
		1.06	3.65	1000000000000000	1.25	1e+16	20	100	4.1056					1.06	3.65	1000000000000000	1.25	1e+16	20	100	1.27412					1.06	3.65	1000000000000000	1.25	1e+16	20	100	3.86146
		1.06	3.65	1000000000000000	1.25	1e+16	60	20	5.64111					1.06	3.65	1000000000000000	1.25	1e+16	60	20	1.27221					1.06	3.65	1000000000000000	1.25	1e+16	60	20	5.23647
		1.06	3.65	1000000000000000	1.25	1e+16	60	60	5.63027					1.06	3.65	1000000000000000	1.25	1e+16	60	60	1.27313					1.06	3.65	1000000000000000	1.25	1e+16	60	60	5.22863
		1.06	3.65	1000000000000000	1.25	1e+16	60	100	5.62809					1.06	3.65	1000000000000000	1.25	1e+16	60	100	1.27331					1.06	3.65	1000000000000000	1.25	1e+16	60	100	5.22705
		1.06	3.65	1000000000000000	1.25	1e+16	100	20	6.3171					1.06	3.65	1000000000000000	1.25	1e+16	100	20	1.27201					1.06	3.65	1000000000000000	1.25	1e+16	100	20	5.84128
		1.06	3.65	1000000000000000	1.25	1e+16	100	60	6.30533					1.06	3.65	1000000000000000	1.25	1e+16	100	60	1.27294					1.06	3.65	1000000000000000	1.25	1e+16	100	60	5.83301
		1.06	3.65	1000000000000000	1.25	1e+16	100	100	6.30297					1.06	3.65	1000000000000000	1.25	1e+16	100	100	1.27313					1.06	3.65	1000000000000000	1.25	1e+16	100	100	5.83135
		1.06	3.65	1000000000000000	1.5	10000000000000	20	20	21.7446					1.06	3.65	1000000000000000	1.5	10000000000000	20	20	10.95					1.06	3.65	1000000000000000	1.5	10000000000000	20	20	21.3519
		1.06	3.65	1000000000000000	1.5	10000000000000	20	60	21.76					1.06	3.65	1000000000000000	1.5	10000000000000	20	60	10.9496					1.06	3.65	1000000000000000	1.5	10000000000000	20	60	21.3645
		1.06	3.65	1000000000000000	1.5	10000000000000	20	100	21.7631					1.06	3.65	1000000000000000	1.5	10000000000000	20	100	10.9496					1.06	3.65	1000000000000000	1.5	10000000000000	20	100	21.367
		1.06	3.65	1000000000000000	1.5	10000000000000	60	20	21.8522					1.06	3.65	1000000000000000	1.5	10000000000000	60	20	11.0798					1.06	3.65	1000000000000000	1.5	10000000000000	60	20	21.4634
		1.06	3.65	1000000000000000	1.5	10000000000000	60	60	21.8695					1.06	3.65	1000000000000000	1.5	10000000000000	60	60	11.0795					1.06	3.65	1000000000000000	1.5	10000000000000	60	60	21.4774
		1.06	3.65	1000000000000000	1.5	10000000000000	60	100	21.8729					1.06	3.65	1000000000000000	1.5	10000000000000	60	100	11.0795					1.06	3.65	1000000000000000	1.5	10000000000000	60	100	21.4802
		1.06	3.65	1000000000000000	1.5	10000000000000	100	20	21.8756					1.06	3.65	1000000000000000	1.5	10000000000000	100	20	11.1065					1.06	3.65	1000000000000000	1.5	10000000000000	100	20	21.4873
		1.06	3.65	1000000000000000	1.5	10000000000000	100	60	21.8933					1.06	3.65	1000000000000000	1.5	10000000000000	100	60	11.1063					1.06	3.65	1000000000000000	1.5	10000000000000	100	60	21.5016
		1.06	3.65	1000000000000000	1.5	10000000000000	100	100	21.8968					1.06	3.65	1000000000000000	1.5	10000000000000	100	100	11.1062					1.06	3.65	1000000000000000	1.5	10000000000000	100	100	21.5045
		1.06	3.65	1000000000000000	1.5	100000000000000	20	20	17.3057					1.06	3.65	1000000000000000	1.5	100000000000000	20	20	3.79212					1.06	3.65	1000000000000000	1.5	100000000000000	20	20	16.147
		1.06	3.65	1000000000000000	1.5	100000000000000	20	60	17.3046					1.06	3.65	1000000000000000	1.5	100000000000000	20	60	3.79117					1.06	3.65	1000000000000000	1.5	100000000000000	20	60	16.1446
		1.06	3.65	1000000000000000	1.5	100000000000000	20	100	17.3043					1.06	3.65	1000000000000000	1.5	100000000000000	20	100	3.79097					1.06	3.65	1000000000000000	1.5	100000000000000	20	100	16.1441
		1.06	3.65	1000000000000000	1.5	100000000000000	60	20	18.0779					1.06	3.65	1000000000000000	1.5	100000000000000	60	20	4.08232					1.06	3.65	1000000000000000	1.5	100000000000000	60	20	16.8859
		1.06	3.65	1000000000000000	1.5	100000000000000	60	60	18.0808					1.06	3.65	1000000000000000	1.5	100000000000000	60	60	4.08192					1.06	3.65	1000000000000000	1.5	100000000000000	60	60	16.8868
		1.06	3.65	1000000000000000	1.5	100000000000000	60	100	18.0813					1.06	3.65	1000000000000000	1.5	100000000000000	60	100	4.08184					1.06	3.65	1000000000000000	1.5	100000000000000	60	100	16.8869
		1.06	3.65	1000000000000000	1.5	100000000000000	100	20	18.2581					1.06	3.65	1000000000000000	1.5	100000000000000	100	20	4.14857					1.06	3.65	1000000000000000	1.5	100000000000000	100	20	17.0571
		1.06	3.65	1000000000000000	1.5	100000000000000	100	60	18.2622					1.06	3.65	1000000000000000	1.5	100000000000000	100	60	4.14835					1.06	3.65	1000000000000000	1.5	100000000000000	100	60	17.0589
		1.06	3.65	1000000000000000	1.5	100000000000000	100	100	18.263					1.06	3.65	1000000000000000	1.5	100000000000000	100	100	4.14831					1.06	3.65	1000000000000000	1.5	100000000000000	100	100	17.0593
		1.06	3.65	1000000000000000	1.5	1000000000000000	20	20	9.62606					1.06	3.65	1000000000000000	1.5	1000000000000000	20	20	1.28384					1.06	3.65	1000000000000000	1.5	1000000000000000	20	20	8.73943
		1.06	3.65	1000000000000000	1.5	1000000000000000	20	60	9.60915					1.06	3.65	1000000000000000	1.5	1000000000000000	20	60	1.28484					1.06	3.65	1000000000000000	1.5	1000000000000000	20	60	8.72602
		1.06	3.65	1000000000000000	1.5	1000000000000000	20	100	9.60573					1.06	3.65	1000000000000000	1.5	1000000000000000	20	100	1.28504					1.06	3.65	1000000000000000	1.5	1000000000000000	20	100	8.72332
		1.06	3.65	1000000000000000	1.5	1000000000000000	60	20	11.5933					1.06	3.65	1000000000000000	1.5	1000000000000000	60	20	1.28342					1.06	3.65	1000000000000000	1.5	1000000000000000	60	20	10.5074
		1.06	3.65	1000000000000000	1.5	1000000000000000	60	60	11.5813					1.06	3.65	1000000000000000	1.5	1000000000000000	60	60	1.28443					1.06	3.65	1000000000000000	1.5	1000000000000000	60	60	10.4983
		1.06	3.65	1000000000000000	1.5	1000000000000000	60	100	11.5788					1.06	3.65	1000000000000000	1.5	1000000000000000	60	100	1.28463					1.06	3.65	1000000000000000	1.5	1000000000000000	60	100	10.4964
		1.06	3.65	1000000000000000	1.5	1000000000000000	100	20	12.1727					1.06	3.65	1000000000000000	1.5	1000000000000000	100	20	1.28333					1.06	3.65	1000000000000000	1.5	1000000000000000	100	20	11.029
		1.06	3.65	1000000000000000	1.5	1000000000000000	100	60	12.1635					1.06	3.65	1000000000000000	1.5	1000000000000000	100	60	1.28434					1.06	3.65	1000000000000000	1.5	1000000000000000	100	60	11.0224
		1.06	3.65	1000000000000000	1.5	1000000000000000	100	100	12.1616					1.06	3.65	1000000000000000	1.5	1000000000000000	100	100	1.28454					1.06	3.65	1000000000000000	1.5	1000000000000000	100	100	11.021
		1.06	3.65	1000000000000000	1.5	1e+16	20	20	3.94886					1.06	3.65	1000000000000000	1.5	1e+16	20	20	1.27265					1.06	3.65	1000000000000000	1.5	1e+16	20	20	3.72081
		1.06	3.65	1000000000000000	1.5	1e+16	20	60	3.94332					1.06	3.65	1000000000000000	1.5	1e+16	20	60	1.27372					1.06	3.65	1000000000000000	1.5	1e+16	20	60	3.71722
		1.06	3.65	1000000000000000	1.5	1e+16	20	100	3.94221					1.06	3.65	1000000000000000	1.5	1e+16	20	100	1.27394					1.06	3.65	1000000000000000	1.5	1e+16	20	100	3.7165
		1.06	3.65	1000000000000000	1.5	1e+16	60	20	5.27783					1.06	3.65	1000000000000000	1.5	1e+16	60	20	1.2716					1.06	3.65	1000000000000000	1.5	1e+16	60	20	4.91901
		1.06	3.65	1000000000000000	1.5	1e+16	60	60	5.26546					1.06	3.65	1000000000000000	1.5	1e+16	60	60	1.2728					1.06	3.65	1000000000000000	1.5	1e+16	60	60	4.91025
		1.06	3.65	1000000000000000	1.5	1e+16	60	100	5.26298					1.06	3.65	1000000000000000	1.5	1e+16	60	100	1.27304					1.06	3.65	1000000000000000	1.5	1e+16	60	100	4.90848
		1.06	3.65	1000000000000000	1.5	1e+16	100	20	5.89216					1.06	3.65	1000000000000000	1.5	1e+16	100	20	1.27135					1.06	3.65	1000000000000000	1.5	1e+16	100	20	5.47284
		1.06	3.65	1000000000000000	1.5	1e+16	100	60	5.87781					1.06	3.65	1000000000000000	1.5	1e+16	100	60	1.27259					1.06	3.65	1000000000000000	1.5	1e+16	100	60	5.46284
		1.06	3.65	1000000000000000	1.5	1e+16	100	100	5.87492					1.06	3.65	1000000000000000	1.5	1e+16	100	100	1.27284					1.06	3.65	1000000000000000	1.5	1e+16	100	100	5.46082
		1.06	3.65	1000000000000000	1.75	10000000000000	20	20	21.7869					1.06	3.65	1000000000000000	1.75	10000000000000	20	20	10.4516					1.06	3.65	1000000000000000	1.75	10000000000000	20	20	21.3568
		1.06	3.65	1000000000000000	1.75	10000000000000	20	60	21.8052					1.06	3.65	1000000000000000	1.75	10000000000000	20	60	10.4511					1.06	3.65	1000000000000000	1.75	10000000000000	20	60	21.3715
		1.06	3.65	1000000000000000	1.75	10000000000000	20	100	21.8089					1.06	3.65	1000000000000000	1.75	10000000000000	20	100	10.451					1.06	3.65	1000000000000000	1.75	10000000000000	20	100	21.3744
		1.06	3.65	1000000000000000	1.75	10000000000000	60	20	21.9128					1.06	3.65	1000000000000000	1.75	10000000000000	60	20	10.5901					1.06	3.65	1000000000000000	1.75	10000000000000	60	20	21.4868
		1.06	3.65	1000000000000000	1.75	10000000000000	60	60	21.9334					1.06	3.65	1000000000000000	1.75	10000000000000	60	60	10.5897					1.06	3.65	1000000000000000	1.75	10000000000000	60	60	21.5033
		1.06	3.65	1000000000000000	1.75	10000000000000	60	100	21.9375					1.06	3.65	1000000000000000	1.75	10000000000000	60	100	10.5896					1.06	3.65	1000000000000000	1.75	10000000000000	60	100	21.5066
		1.06	3.65	1000000000000000	1.75	10000000000000	100	20	21.9402					1.06	3.65	1000000000000000	1.75	10000000000000	100	20	10.6193					1.06	3.65	1000000000000000	1.75	10000000000000	100	20	21.5147
		1.06	3.65	1000000000000000	1.75	10000000000000	100	60	21.9614					1.06	3.65	1000000000000000	1.75	10000000000000	100	60	10.6189					1.06	3.65	1000000000000000	1.75	10000000000000	100	60	21.5316
		1.06	3.65	1000000000000000	1.75	10000000000000	100	100	21.9657					1.06	3.65	1000000000000000	1.75	10000000000000	100	100	10.6188					1.06	3.65	1000000000000000	1.75	10000000000000	100	100	21.535
		1.06	3.65	1000000000000000	1.75	100000000000000	20	20	16.8959					1.06	3.65	1000000000000000	1.75	100000000000000	20	20	3.44961					1.06	3.65	1000000000000000	1.75	100000000000000	20	20	15.7006
		1.06	3.65	1000000000000000	1.75	100000000000000	20	60	16.8924					1.06	3.65	1000000000000000	1.75	100000000000000	20	60	3.44825					1.06	3.65	1000000000000000	1.75	100000000000000	20	60	15.696
		1.06	3.65	1000000000000000	1.75	100000000000000	20	100	16.8916					1.06	3.65	1000000000000000	1.75	100000000000000	20	100	3.44797					1.06	3.65	1000000000000000	1.75	100000000000000	20	100	15.695
		1.06	3.65	1000000000000000	1.75	100000000000000	60	20	17.7593					1.06	3.65	1000000000000000	1.75	100000000000000	60	20	3.74552					1.06	3.65	1000000000000000	1.75	100000000000000	60	20	16.5208
		1.06	3.65	1000000000000000	1.75	100000000000000	60	60	17.761					1.06	3.65	1000000000000000	1.75	100000000000000	60	60	3.74493					1.06	3.65	1000000000000000	1.75	100000000000000	60	60	16.5206
		1.06	3.65	1000000000000000	1.75	100000000000000	60	100	17.7613					1.06	3.65	1000000000000000	1.75	100000000000000	60	100	3.7448					1.06	3.65	1000000000000000	1.75	100000000000000	60	100	16.5205
		1.06	3.65	1000000000000000	1.75	100000000000000	100	20	17.9633					1.06	3.65	1000000000000000	1.75	100000000000000	100	20	3.81453					1.06	3.65	1000000000000000	1.75	100000000000000	100	20	16.7134
		1.06	3.65	1000000000000000	1.75	100000000000000	100	60	17.9666					1.06	3.65	1000000000000000	1.75	100000000000000	100	60	3.81413					1.06	3.65	1000000000000000	1.75	100000000000000	100	60	16.7145
		1.06	3.65	1000000000000000	1.75	100000000000000	100	100	17.9672					1.06	3.65	1000000000000000	1.75	100000000000000	100	100	3.81405					1.06	3.65	1000000000000000	1.75	100000000000000	100	100	16.7147
		1.06	3.65	1000000000000000	1.75	1000000000000000	20	20	9.16299					1.06	3.65	1000000000000000	1.75	1000000000000000	20	20	1.2812					1.06	3.65	1000000000000000	1.75	1000000000000000	20	20	8.32397
		1.06	3.65	1000000000000000	1.75	1000000000000000	20	60	9.1418					1.06	3.65	1000000000000000	1.75	1000000000000000	20	60	1.28251					1.06	3.65	1000000000000000	1.75	1000000000000000	20	60	8.30738
		1.06	3.65	1000000000000000	1.75	1000000000000000	20	100	9.13753					1.06	3.65	1000000000000000	1.75	1000000000000000	20	100	1.28277					1.06	3.65	1000000000000000	1.75	1000000000000000	20	100	8.30402
		1.06	3.65	1000000000000000	1.75	1000000000000000	60	20	11.1672					1.06	3.65	1000000000000000	1.75	1000000000000000	60	20	1.28053					1.06	3.65	1000000000000000	1.75	1000000000000000	60	20	10.1145
		1.06	3.65	1000000000000000	1.75	1000000000000000	60	60	11.1508					1.06	3.65	1000000000000000	1.75	1000000000000000	60	60	1.28186					1.06	3.65	1000000000000000	1.75	1000000000000000	60	60	10.1022
		1.06	3.65	1000000000000000	1.75	1000000000000000	60	100	11.1475					1.06	3.65	1000000000000000	1.75	1000000000000000	60	100	1.28213					1.06	3.65	1000000000000000	1.75	1000000000000000	60	100	10.0997
		1.06	3.65	1000000000000000	1.75	1000000000000000	100	20	11.7749					1.06	3.65	1000000000000000	1.75	1000000000000000	100	20	1.28039					1.06	3.65	1000000000000000	1.75	1000000000000000	100	20	10.6613
		1.06	3.65	1000000000000000	1.75	1000000000000000	100	60	11.7618					1.06	3.65	1000000000000000	1.75	1000000000000000	100	60	1.28172					1.06	3.65	1000000000000000	1.75	1000000000000000	100	60	10.652
		1.06	3.65	1000000000000000	1.75	1000000000000000	100	100	11.7591					1.06	3.65	1000000000000000	1.75	1000000000000000	100	100	1.28199					1.06	3.65	1000000000000000	1.75	1000000000000000	100	100	10.6501
		1.06	3.65	1000000000000000	1.75	1e+16	20	20	3.86276					1.06	3.65	1000000000000000	1.75	1e+16	20	20	1.27229					1.06	3.65	1000000000000000	1.75	1e+16	20	20	3.64381
		1.06	3.65	1000000000000000	1.75	1e+16	20	60	3.85804					1.06	3.65	1000000000000000	1.75	1e+16	20	60	1.27357					1.06	3.65	1000000000000000	1.75	1e+16	20	60	3.64122
		1.06	3.65	1000000000000000	1.75	1e+16	20	100	3.85709					1.06	3.65	1000000000000000	1.75	1e+16	20	100	1.27382					1.06	3.65	1000000000000000	1.75	1e+16	20	100	3.6407
		1.06	3.65	1000000000000000	1.75	1e+16	60	20	5.03051					1.06	3.65	1000000000000000	1.75	1e+16	60	20	1.27106					1.06	3.65	1000000000000000	1.75	1e+16	60	20	4.70133
		1.06	3.65	1000000000000000	1.75	1e+16	60	60	5.01753					1.06	3.65	1000000000000000	1.75	1e+16	60	60	1.27255					1.06	3.65	1000000000000000	1.75	1e+16	60	60	4.69244
		1.06	3.65	1000000000000000	1.75	1e+16	60	100	5.01492					1.06	3.65	1000000000000000	1.75	1e+16	60	100	1.27285					1.06	3.65	1000000000000000	1.75	1e+16	60	100	4.69064
		1.06	3.65	1000000000000000	1.75	1e+16	100	20	5.5788					1.06	3.65	1000000000000000	1.75	1e+16	100	20	1.27077					1.06	3.65	1000000000000000	1.75	1e+16	100	20	5.19924
		1.06	3.65	1000000000000000	1.75	1e+16	100	60	5.56276					1.06	3.65	1000000000000000	1.75	1e+16	100	60	1.27231					1.06	3.65	1000000000000000	1.75	1e+16	100	60	5.18823
		1.06	3.65	1000000000000000	1.75	1e+16	100	100	5.55953					1.06	3.65	1000000000000000	1.75	1e+16	100	100	1.27262					1.06	3.65	1000000000000000	1.75	1e+16	100	100	5.186
		1.06	3.65	1e+16	0.75	10000000000000	20	20	20.5888					1.06	3.65	1e+16	0.75	10000000000000	20	20	12.671					1.06	3.65	1e+16	0.75	10000000000000	20	20	20.3827
		1.06	3.65	1e+16	0.75	10000000000000	20	60	20.5901					1.06	3.65	1e+16	0.75	10000000000000	20	60	12.671					1.06	3.65	1e+16	0.75	10000000000000	20	60	20.384
		1.06	3.65	1e+16	0.75	10000000000000	20	100	20.5904					1.06	3.65	1e+16	0.75	10000000000000	20	100	12.671					1.06	3.65	1e+16	0.75	10000000000000	20	100	20.3843
		1.06	3.65	1e+16	0.75	10000000000000	60	20	20.6152					1.06	3.65	1e+16	0.75	10000000000000	60	20	12.7663					1.06	3.65	1e+16	0.75	10000000000000	60	20	20.4157
		1.06	3.65	1e+16	0.75	10000000000000	60	60	20.6166					1.06	3.65	1e+16	0.75	10000000000000	60	60	12.7663					1.06	3.65	1e+16	0.75	10000000000000	60	60	20.4171
		1.06	3.65	1e+16	0.75	10000000000000	60	100	20.6169					1.06	3.65	1e+16	0.75	10000000000000	60	100	12.7663					1.06	3.65	1e+16	0.75	10000000000000	60	100	20.4173
		1.06	3.65	1e+16	0.75	10000000000000	100	20	20.6206					1.06	3.65	1e+16	0.75	10000000000000	100	20	12.7858					1.06	3.65	1e+16	0.75	10000000000000	100	20	20.4224
		1.06	3.65	1e+16	0.75	10000000000000	100	60	20.6219					1.06	3.65	1e+16	0.75	10000000000000	100	60	12.7858					1.06	3.65	1e+16	0.75	10000000000000	100	60	20.4238
		1.06	3.65	1e+16	0.75	10000000000000	100	100	20.6222					1.06	3.65	1e+16	0.75	10000000000000	100	100	12.7858					1.06	3.65	1e+16	0.75	10000000000000	100	100	20.424
		1.06	3.65	1e+16	0.75	100000000000000	20	20	19.6997					1.06	3.65	1e+16	0.75	100000000000000	20	20	6.45063					1.06	3.65	1e+16	0.75	100000000000000	20	20	19.1129
		1.06	3.65	1e+16	0.75	100000000000000	20	60	19.7006					1.06	3.65	1e+16	0.75	100000000000000	20	60	6.45064					1.06	3.65	1e+16	0.75	100000000000000	20	60	19.1136
		1.06	3.65	1e+16	0.75	100000000000000	20	100	19.7007					1.06	3.65	1e+16	0.75	100000000000000	20	100	6.45063					1.06	3.65	1e+16	0.75	100000000000000	20	100	19.1138
		1.06	3.65	1e+16	0.75	100000000000000	60	20	19.9193					1.06	3.65	1e+16	0.75	100000000000000	60	20	6.70333					1.06	3.65	1e+16	0.75	100000000000000	60	20	19.3693
		1.06	3.65	1e+16	0.75	100000000000000	60	60	19.9203					1.06	3.65	1e+16	0.75	100000000000000	60	60	6.70336					1.06	3.65	1e+16	0.75	100000000000000	60	60	19.3702
		1.06	3.65	1e+16	0.75	100000000000000	60	100	19.9205					1.06	3.65	1e+16	0.75	100000000000000	60	100	6.70337					1.06	3.65	1e+16	0.75	100000000000000	60	100	19.3703
		1.06	3.65	1e+16	0.75	100000000000000	100	20	19.9646					1.06	3.65	1e+16	0.75	100000000000000	100	20	6.75756					1.06	3.65	1e+16	0.75	100000000000000	100	20	19.4225
		1.06	3.65	1e+16	0.75	100000000000000	100	60	19.9656					1.06	3.65	1e+16	0.75	100000000000000	100	60	6.7576					1.06	3.65	1e+16	0.75	100000000000000	100	60	19.4234
		1.06	3.65	1e+16	0.75	100000000000000	100	100	19.9658					1.06	3.65	1e+16	0.75	100000000000000	100	100	6.75761					1.06	3.65	1e+16	0.75	100000000000000	100	100	19.4235
		1.06	3.65	1e+16	0.75	1000000000000000	20	20	15.8905					1.06	3.65	1e+16	0.75	1000000000000000	20	20	2.68594					1.06	3.65	1e+16	0.75	1000000000000000	20	20	14.7465
		1.06	3.65	1e+16	0.75	1000000000000000	20	60	15.8903					1.06	3.65	1e+16	0.75	1000000000000000	20	60	2.68586					1.06	3.65	1e+16	0.75	1000000000000000	20	60	14.7463
		1.06	3.65	1e+16	0.75	1000000000000000	20	100	15.8902					1.06	3.65	1e+16	0.75	1000000000000000	20	100	2.68584					1.06	3.65	1e+16	0.75	1000000000000000	20	100	14.7462
		1.06	3.65	1e+16	0.75	1000000000000000	60	20	16.8779					1.06	3.65	1e+16	0.75	1000000000000000	60	20	3.05985					1.06	3.65	1e+16	0.75	1000000000000000	60	20	15.7072
		1.06	3.65	1e+16	0.75	1000000000000000	60	60	16.878					1.06	3.65	1e+16	0.75	1000000000000000	60	60	3.05984					1.06	3.65	1e+16	0.75	1000000000000000	60	60	15.7073
		1.06	3.65	1e+16	0.75	1000000000000000	60	100	16.878					1.06	3.65	1e+16	0.75	1000000000000000	60	100	3.05984					1.06	3.65	1e+16	0.75	1000000000000000	60	100	15.7073
		1.06	3.65	1e+16	0.75	1000000000000000	100	20	17.1006					1.06	3.65	1e+16	0.75	1000000000000000	100	20	3.15108					1.06	3.65	1e+16	0.75	1000000000000000	100	20	15.9253
		1.06	3.65	1e+16	0.75	1000000000000000	100	60	17.1008					1.06	3.65	1e+16	0.75	1000000000000000	100	60	3.15109					1.06	3.65	1e+16	0.75	1000000000000000	100	60	15.9254
		1.06	3.65	1e+16	0.75	1000000000000000	100	100	17.1009					1.06	3.65	1e+16	0.75	1000000000000000	100	100	3.15109					1.06	3.65	1e+16	0.75	1000000000000000	100	100	15.9254
		1.06	3.65	1e+16	0.75	1e+16	20	20	9.40718					1.06	3.65	1e+16	0.75	1e+16	20	20	1.28874					1.06	3.65	1e+16	0.75	1e+16	20	20	8.58966
		1.06	3.65	1e+16	0.75	1e+16	20	60	9.4065					1.06	3.65	1e+16	0.75	1e+16	20	60	1.28878					1.06	3.65	1e+16	0.75	1e+16	20	60	8.5891
		1.06	3.65	1e+16	0.75	1e+16	20	100	9.40637					1.06	3.65	1e+16	0.75	1e+16	20	100	1.28879					1.06	3.65	1e+16	0.75	1e+16	20	100	8.58899
		1.06	3.65	1e+16	0.75	1e+16	60	20	11.4889					1.06	3.65	1e+16	0.75	1e+16	60	20	1.28795					1.06	3.65	1e+16	0.75	1e+16	60	20	10.4614
		1.06	3.65	1e+16	0.75	1e+16	60	60	11.4885					1.06	3.65	1e+16	0.75	1e+16	60	60	1.28799					1.06	3.65	1e+16	0.75	1e+16	60	60	10.461
		1.06	3.65	1e+16	0.75	1e+16	60	100	11.4884					1.06	3.65	1e+16	0.75	1e+16	60	100	1.288					1.06	3.65	1e+16	0.75	1e+16	60	100	10.4609
		1.06	3.65	1e+16	0.75	1e+16	100	20	12.1018					1.06	3.65	1e+16	0.75	1e+16	100	20	1.28777					1.06	3.65	1e+16	0.75	1e+16	100	20	11.0114
		1.06	3.65	1e+16	0.75	1e+16	100	60	12.1015					1.06	3.65	1e+16	0.75	1e+16	100	60	1.28781					1.06	3.65	1e+16	0.75	1e+16	100	60	11.0111
		1.06	3.65	1e+16	0.75	1e+16	100	100	12.1014					1.06	3.65	1e+16	0.75	1e+16	100	100	1.28782					1.06	3.65	1e+16	0.75	1e+16	100	100	11.0111
		1.06	3.65	1e+16	1	10000000000000	20	20	21.559					1.06	3.65	1e+16	1	10000000000000	20	20	12.2674					1.06	3.65	1e+16	1	10000000000000	20	20	21.3115
		1.06	3.65	1e+16	1	10000000000000	20	60	21.5611					1.06	3.65	1e+16	1	10000000000000	20	60	12.2673					1.06	3.65	1e+16	1	10000000000000	20	60	21.3135
		1.06	3.65	1e+16	1	10000000000000	20	100	21.5615					1.06	3.65	1e+16	1	10000000000000	20	100	12.2673					1.06	3.65	1e+16	1	10000000000000	20	100	21.3139
		1.06	3.65	1e+16	1	10000000000000	60	20	21.5978					1.06	3.65	1e+16	1	10000000000000	60	20	12.3799					1.06	3.65	1e+16	1	10000000000000	60	20	21.3594
		1.06	3.65	1e+16	1	10000000000000	60	60	21.5999					1.06	3.65	1e+16	1	10000000000000	60	60	12.3798					1.06	3.65	1e+16	1	10000000000000	60	60	21.3615
		1.06	3.65	1e+16	1	10000000000000	60	100	21.6004					1.06	3.65	1e+16	1	10000000000000	60	100	12.3798					1.06	3.65	1e+16	1	10000000000000	60	100	21.3619
		1.06	3.65	1e+16	1	10000000000000	100	20	21.6056					1.06	3.65	1e+16	1	10000000000000	100	20	12.403					1.06	3.65	1e+16	1	10000000000000	100	20	21.3691
		1.06	3.65	1e+16	1	10000000000000	100	60	21.6078					1.06	3.65	1e+16	1	10000000000000	100	60	12.4029					1.06	3.65	1e+16	1	10000000000000	100	60	21.3712
		1.06	3.65	1e+16	1	10000000000000	100	100	21.6082					1.06	3.65	1e+16	1	10000000000000	100	100	12.4029					1.06	3.65	1e+16	1	10000000000000	100	100	21.3716
		1.06	3.65	1e+16	1	100000000000000	20	20	20.3272					1.06	3.65	1e+16	1	100000000000000	20	20	6.11293					1.06	3.65	1e+16	1	100000000000000	20	20	19.5961
		1.06	3.65	1e+16	1	100000000000000	20	60	20.3284					1.06	3.65	1e+16	1	100000000000000	20	60	6.11285					1.06	3.65	1e+16	1	100000000000000	20	60	19.5969
		1.06	3.65	1e+16	1	100000000000000	20	100	20.3286					1.06	3.65	1e+16	1	100000000000000	20	100	6.11284					1.06	3.65	1e+16	1	100000000000000	20	100	19.5971
		1.06	3.65	1e+16	1	100000000000000	60	20	20.6326					1.06	3.65	1e+16	1	100000000000000	60	20	6.40488					1.06	3.65	1e+16	1	100000000000000	60	20	19.9416
		1.06	3.65	1e+16	1	100000000000000	60	60	20.6341					1.06	3.65	1e+16	1	100000000000000	60	60	6.40491					1.06	3.65	1e+16	1	100000000000000	60	60	19.9427
		1.06	3.65	1e+16	1	100000000000000	60	100	20.6343					1.06	3.65	1e+16	1	100000000000000	60	100	6.40491					1.06	3.65	1e+16	1	100000000000000	60	100	19.9429
		1.06	3.65	1e+16	1	100000000000000	100	20	20.6961					1.06	3.65	1e+16	1	100000000000000	100	20	6.46816					1.06	3.65	1e+16	1	100000000000000	100	20	20.0138
		1.06	3.65	1e+16	1	100000000000000	100	60	20.6976					1.06	3.65	1e+16	1	100000000000000	100	60	6.46822					1.06	3.65	1e+16	1	100000000000000	100	60	20.0149
		1.06	3.65	1e+16	1	100000000000000	100	100	20.6979					1.06	3.65	1e+16	1	100000000000000	100	100	6.46823					1.06	3.65	1e+16	1	100000000000000	100	100	20.0152
		1.06	3.65	1e+16	1	1000000000000000	20	20	15.7702					1.06	3.65	1e+16	1	1000000000000000	20	20	2.40287					1.06	3.65	1e+16	1	1000000000000000	20	20	14.5693
		1.06	3.65	1e+16	1	1000000000000000	20	60	15.7696					1.06	3.65	1e+16	1	1000000000000000	20	60	2.40273					1.06	3.65	1e+16	1	1000000000000000	20	60	14.5687
		1.06	3.65	1e+16	1	1000000000000000	20	100	15.7695					1.06	3.65	1e+16	1	1000000000000000	20	100	2.4027					1.06	3.65	1e+16	1	1000000000000000	20	100	14.5686
		1.06	3.65	1e+16	1	1000000000000000	60	20	16.9853					1.06	3.65	1e+16	1	1000000000000000	60	20	2.77786					1.06	3.65	1e+16	1	1000000000000000	60	20	15.7271
		1.06	3.65	1e+16	1	1000000000000000	60	60	16.9853					1.06	3.65	1e+16	1	1000000000000000	60	60	2.77782					1.06	3.65	1e+16	1	1000000000000000	60	60	15.727
		1.06	3.65	1e+16	1	1000000000000000	60	100	16.9853					1.06	3.65	1e+16	1	1000000000000000	60	100	2.77781					1.06	3.65	1e+16	1	1000000000000000	60	100	15.727
		1.06	3.65	1e+16	1	1000000000000000	100	20	17.2675					1.06	3.65	1e+16	1	1000000000000000	100	20	2.87605					1.06	3.65	1e+16	1	1000000000000000	100	20	15.9974
		1.06	3.65	1e+16	1	1000000000000000	100	60	17.2677					1.06	3.65	1e+16	1	1000000000000000	100	60	2.87605					1.06	3.65	1e+16	1	1000000000000000	100	60	15.9975
		1.06	3.65	1e+16	1	1000000000000000	100	100	17.2677					1.06	3.65	1e+16	1	1000000000000000	100	100	2.87605					1.06	3.65	1e+16	1	1000000000000000	100	100	15.9975
		1.06	3.65	1e+16	1	1e+16	20	20	8.93554					1.06	3.65	1e+16	1	1e+16	20	20	1.28619					1.06	3.65	1e+16	1	1e+16	20	20	8.15962
		1.06	3.65	1e+16	1	1e+16	20	60	8.93462					1.06	3.65	1e+16	1	1e+16	20	60	1.28626					1.06	3.65	1e+16	1	1e+16	20	60	8.15888
		1.06	3.65	1e+16	1	1e+16	20	100	8.93443					1.06	3.65	1e+16	1	1e+16	20	100	1.28627					1.06	3.65	1e+16	1	1e+16	20	100	8.15873
		1.06	3.65	1e+16	1	1e+16	60	20	11.0929					1.06	3.65	1e+16	1	1e+16	60	20	1.28464					1.06	3.65	1e+16	1	1e+16	60	20	10.0877
		1.06	3.65	1e+16	1	1e+16	60	60	11.092					1.06	3.65	1e+16	1	1e+16	60	60	1.28471					1.06	3.65	1e+16	1	1e+16	60	60	10.087
		1.06	3.65	1e+16	1	1e+16	60	100	11.0918					1.06	3.65	1e+16	1	1e+16	60	100	1.28473					1.06	3.65	1e+16	1	1e+16	60	100	10.0868
		1.06	3.65	1e+16	1	1e+16	100	20	11.7904					1.06	3.65	1e+16	1	1e+16	100	20	1.28428					1.06	3.65	1e+16	1	1e+16	100	20	10.7133
		1.06	3.65	1e+16	1	1e+16	100	60	11.7898					1.06	3.65	1e+16	1	1e+16	100	60	1.28435					1.06	3.65	1e+16	1	1e+16	100	60	10.7128
		1.06	3.65	1e+16	1	1e+16	100	100	11.7896					1.06	3.65	1e+16	1	1e+16	100	100	1.28436					1.06	3.65	1e+16	1	1e+16	100	100	10.7127
		1.06	3.65	1e+16	1.25	10000000000000	20	20	22.0478					1.06	3.65	1e+16	1.25	10000000000000	20	20	11.7624					1.06	3.65	1e+16	1.25	10000000000000	20	20	21.7679
		1.06	3.65	1e+16	1.25	10000000000000	20	60	22.0507					1.06	3.65	1e+16	1.25	10000000000000	20	60	11.7622					1.06	3.65	1e+16	1.25	10000000000000	20	60	21.7706
		1.06	3.65	1e+16	1.25	10000000000000	20	100	22.0512					1.06	3.65	1e+16	1.25	10000000000000	20	100	11.7622					1.06	3.65	1e+16	1.25	10000000000000	20	100	21.7712
		1.06	3.65	1e+16	1.25	10000000000000	60	20	22.0987					1.06	3.65	1e+16	1.25	10000000000000	60	20	11.8886					1.06	3.65	1e+16	1.25	10000000000000	60	20	21.8303
		1.06	3.65	1e+16	1.25	10000000000000	60	60	22.1017					1.06	3.65	1e+16	1.25	10000000000000	60	60	11.8884					1.06	3.65	1e+16	1.25	10000000000000	60	60	21.8331
		1.06	3.65	1e+16	1.25	10000000000000	60	100	22.1023					1.06	3.65	1e+16	1.25	10000000000000	60	100	11.8884					1.06	3.65	1e+16	1.25	10000000000000	60	100	21.8337
		1.06	3.65	1e+16	1.25	10000000000000	100	20	22.1091					1.06	3.65	1e+16	1.25	10000000000000	100	20	11.9146					1.06	3.65	1e+16	1.25	10000000000000	100	20	21.843
		1.06	3.65	1e+16	1.25	10000000000000	100	60	22.112					1.06	3.65	1e+16	1.25	10000000000000	100	60	11.9144					1.06	3.65	1e+16	1.25	10000000000000	100	60	21.8459
		1.06	3.65	1e+16	1.25	10000000000000	100	100	22.1126					1.06	3.65	1e+16	1.25	10000000000000	100	100	11.9144					1.06	3.65	1e+16	1.25	10000000000000	100	100	21.8464
		1.06	3.65	1e+16	1.25	100000000000000	20	20	20.515					1.06	3.65	1e+16	1.25	100000000000000	20	20	5.78057					1.06	3.65	1e+16	1.25	100000000000000	20	20	19.6732
		1.06	3.65	1e+16	1.25	100000000000000	20	60	20.5163					1.06	3.65	1e+16	1.25	100000000000000	20	60	5.78043					1.06	3.65	1e+16	1.25	100000000000000	20	60	19.674
		1.06	3.65	1e+16	1.25	100000000000000	20	100	20.5165					1.06	3.65	1e+16	1.25	100000000000000	20	100	5.7804					1.06	3.65	1e+16	1.25	100000000000000	20	100	19.6741
		1.06	3.65	1e+16	1.25	100000000000000	60	20	20.896					1.06	3.65	1e+16	1.25	100000000000000	60	20	6.09954					1.06	3.65	1e+16	1.25	100000000000000	60	20	20.0982
		1.06	3.65	1e+16	1.25	100000000000000	60	60	20.8977					1.06	3.65	1e+16	1.25	100000000000000	60	60	6.09956					1.06	3.65	1e+16	1.25	100000000000000	60	60	20.0994
		1.06	3.65	1e+16	1.25	100000000000000	60	100	20.8981					1.06	3.65	1e+16	1.25	100000000000000	60	100	6.09956					1.06	3.65	1e+16	1.25	100000000000000	60	100	20.0996
		1.06	3.65	1e+16	1.25	100000000000000	100	20	20.9758					1.06	3.65	1e+16	1.25	100000000000000	100	20	6.16943					1.06	3.65	1e+16	1.25	100000000000000	100	20	20.187
		1.06	3.65	1e+16	1.25	100000000000000	100	60	20.9776					1.06	3.65	1e+16	1.25	100000000000000	100	60	6.16948					1.06	3.65	1e+16	1.25	100000000000000	100	60	20.1883
		1.06	3.65	1e+16	1.25	100000000000000	100	100	20.978					1.06	3.65	1e+16	1.25	100000000000000	100	100	6.16949					1.06	3.65	1e+16	1.25	100000000000000	100	100	20.1885
		1.06	3.65	1e+16	1.25	1000000000000000	20	20	15.4493					1.06	3.65	1e+16	1.25	1000000000000000	20	20	2.18526					1.06	3.65	1e+16	1.25	1000000000000000	20	20	14.2341
		1.06	3.65	1e+16	1.25	1000000000000000	20	60	15.4483					1.06	3.65	1e+16	1.25	1000000000000000	20	60	2.18508					1.06	3.65	1e+16	1.25	1000000000000000	20	60	14.2332
		1.06	3.65	1e+16	1.25	1000000000000000	20	100	15.4481					1.06	3.65	1e+16	1.25	1000000000000000	20	100	2.18504					1.06	3.65	1e+16	1.25	1000000000000000	20	100	14.233
		1.06	3.65	1e+16	1.25	1000000000000000	60	20	16.8268					1.06	3.65	1e+16	1.25	1000000000000000	60	20	2.54426					1.06	3.65	1e+16	1.25	1000000000000000	60	20	15.5318
		1.06	3.65	1e+16	1.25	1000000000000000	60	60	16.8266					1.06	3.65	1e+16	1.25	1000000000000000	60	60	2.54418					1.06	3.65	1e+16	1.25	1000000000000000	60	60	15.5315
		1.06	3.65	1e+16	1.25	1000000000000000	60	100	16.8266					1.06	3.65	1e+16	1.25	1000000000000000	60	100	2.54416					1.06	3.65	1e+16	1.25	1000000000000000	60	100	15.5315
		1.06	3.65	1e+16	1.25	1000000000000000	100	20	17.156					1.06	3.65	1e+16	1.25	1000000000000000	100	20	2.63871					1.06	3.65	1e+16	1.25	1000000000000000	100	20	15.8429
		1.06	3.65	1e+16	1.25	1000000000000000	100	60	17.1561					1.06	3.65	1e+16	1.25	1000000000000000	100	60	2.63867					1.06	3.65	1e+16	1.25	1000000000000000	100	60	15.8428
		1.06	3.65	1e+16	1.25	1000000000000000	100	100	17.1561					1.06	3.65	1e+16	1.25	1000000000000000	100	100	2.63866					1.06	3.65	1e+16	1.25	1000000000000000	100	100	15.8428
		1.06	3.65	1e+16	1.25	1e+16	20	20	8.61566					1.06	3.65	1e+16	1.25	1e+16	20	20	1.28493					1.06	3.65	1e+16	1.25	1e+16	20	20	7.87252
		1.06	3.65	1e+16	1.25	1e+16	20	60	8.61468					1.06	3.65	1e+16	1.25	1e+16	20	60	1.28502					1.06	3.65	1e+16	1.25	1e+16	20	60	7.87177
		1.06	3.65	1e+16	1.25	1e+16	20	100	8.61448					1.06	3.65	1e+16	1.25	1e+16	20	100	1.28503					1.06	3.65	1e+16	1.25	1e+16	20	100	7.87162
		1.06	3.65	1e+16	1.25	1e+16	60	20	10.6827					1.06	3.65	1e+16	1.25	1e+16	60	20	1.28273					1.06	3.65	1e+16	1.25	1e+16	60	20	9.71171
		1.06	3.65	1e+16	1.25	1e+16	60	60	10.6815					1.06	3.65	1e+16	1.25	1e+16	60	60	1.28283					1.06	3.65	1e+16	1.25	1e+16	60	60	9.71079
		1.06	3.65	1e+16	1.25	1e+16	60	100	10.6813					1.06	3.65	1e+16	1.25	1e+16	60	100	1.28285					1.06	3.65	1e+16	1.25	1e+16	60	100	9.7106
		1.06	3.65	1e+16	1.25	1e+16	100	20	11.4074					1.06	3.65	1e+16	1.25	1e+16	100	20	1.2822					1.06	3.65	1e+16	1.25	1e+16	100	20	10.3568
		1.06	3.65	1e+16	1.25	1e+16	100	60	11.4063					1.06	3.65	1e+16	1.25	1e+16	100	60	1.2823					1.06	3.65	1e+16	1.25	1e+16	100	60	10.356
		1.06	3.65	1e+16	1.25	1e+16	100	100	11.4061					1.06	3.65	1e+16	1.25	1e+16	100	100	1.28232					1.06	3.65	1e+16	1.25	1e+16	100	100	10.3558
		1.06	3.65	1e+16	1.5	10000000000000	20	20	22.3077					1.06	3.65	1e+16	1.5	10000000000000	20	20	11.2823					1.06	3.65	1e+16	1.5	10000000000000	20	20	21.9997
		1.06	3.65	1e+16	1.5	10000000000000	20	60	22.3114					1.06	3.65	1e+16	1.5	10000000000000	20	60	11.282					1.06	3.65	1e+16	1.5	10000000000000	20	60	22.0031
		1.06	3.65	1e+16	1.5	10000000000000	20	100	22.3121					1.06	3.65	1e+16	1.5	10000000000000	20	100	11.282					1.06	3.65	1e+16	1.5	10000000000000	20	100	22.0038
		1.06	3.65	1e+16	1.5	10000000000000	60	20	22.3706					1.06	3.65	1e+16	1.5	10000000000000	60	20	11.4205					1.06	3.65	1e+16	1.5	10000000000000	60	20	22.0762
		1.06	3.65	1e+16	1.5	10000000000000	60	60	22.3743					1.06	3.65	1e+16	1.5	10000000000000	60	60	11.4203					1.06	3.65	1e+16	1.5	10000000000000	60	60	22.0797
		1.06	3.65	1e+16	1.5	10000000000000	60	100	22.375					1.06	3.65	1e+16	1.5	10000000000000	60	100	11.4202					1.06	3.65	1e+16	1.5	10000000000000	60	100	22.0804
		1.06	3.65	1e+16	1.5	10000000000000	100	20	22.3833					1.06	3.65	1e+16	1.5	10000000000000	100	20	11.449					1.06	3.65	1e+16	1.5	10000000000000	100	20	22.0918
		1.06	3.65	1e+16	1.5	10000000000000	100	60	22.3871					1.06	3.65	1e+16	1.5	10000000000000	100	60	11.4488					1.06	3.65	1e+16	1.5	10000000000000	100	60	22.0953
		1.06	3.65	1e+16	1.5	10000000000000	100	100	22.3878					1.06	3.65	1e+16	1.5	10000000000000	100	100	11.4488					1.06	3.65	1e+16	1.5	10000000000000	100	100	22.096
		1.06	3.65	1e+16	1.5	100000000000000	20	20	20.5091					1.06	3.65	1e+16	1.5	100000000000000	20	20	5.4791					1.06	3.65	1e+16	1.5	100000000000000	20	20	19.5851
		1.06	3.65	1e+16	1.5	100000000000000	20	60	20.5105					1.06	3.65	1e+16	1.5	100000000000000	20	60	5.47886					1.06	3.65	1e+16	1.5	100000000000000	20	60	19.5859
		1.06	3.65	1e+16	1.5	100000000000000	20	100	20.5107					1.06	3.65	1e+16	1.5	100000000000000	20	100	5.47881					1.06	3.65	1e+16	1.5	100000000000000	20	100	19.586
		1.06	3.65	1e+16	1.5	100000000000000	60	20	20.9573					1.06	3.65	1e+16	1.5	100000000000000	60	20	5.81718					1.06	3.65	1e+16	1.5	100000000000000	60	20	20.073
		1.06	3.65	1e+16	1.5	100000000000000	60	60	20.9592					1.06	3.65	1e+16	1.5	100000000000000	60	60	5.81716					1.06	3.65	1e+16	1.5	100000000000000	60	60	20.0742
		1.06	3.65	1e+16	1.5	100000000000000	60	100	20.9596					1.06	3.65	1e+16	1.5	100000000000000	60	100	5.81715					1.06	3.65	1e+16	1.5	100000000000000	60	100	20.0745
		1.06	3.65	1e+16	1.5	100000000000000	100	20	21.0518					1.06	3.65	1e+16	1.5	100000000000000	100	20	5.89186					1.06	3.65	1e+16	1.5	100000000000000	100	20	20.1765
		1.06	3.65	1e+16	1.5	100000000000000	100	60	21.0539					1.06	3.65	1e+16	1.5	100000000000000	100	60	5.89189					1.06	3.65	1e+16	1.5	100000000000000	100	60	20.1779
		1.06	3.65	1e+16	1.5	100000000000000	100	100	21.0543					1.06	3.65	1e+16	1.5	100000000000000	100	100	5.8919					1.06	3.65	1e+16	1.5	100000000000000	100	100	20.1782
		1.06	3.65	1e+16	1.5	1000000000000000	20	20	15.0914					1.06	3.65	1e+16	1.5	1000000000000000	20	20	2.01617					1.06	3.65	1e+16	1.5	1000000000000000	20	20	13.8791
		1.06	3.65	1e+16	1.5	1000000000000000	20	60	15.09					1.06	3.65	1e+16	1.5	1000000000000000	20	60	2.01596					1.06	3.65	1e+16	1.5	1000000000000000	20	60	13.8778
		1.06	3.65	1e+16	1.5	1000000000000000	20	100	15.0897					1.06	3.65	1e+16	1.5	1000000000000000	20	100	2.01591					1.06	3.65	1e+16	1.5	1000000000000000	20	100	13.8775
		1.06	3.65	1e+16	1.5	1000000000000000	60	20	16.5809					1.06	3.65	1e+16	1.5	1000000000000000	60	20	2.35053					1.06	3.65	1e+16	1.5	1000000000000000	60	20	15.2699
		1.06	3.65	1e+16	1.5	1000000000000000	60	60	16.5804					1.06	3.65	1e+16	1.5	1000000000000000	60	60	2.35041					1.06	3.65	1e+16	1.5	1000000000000000	60	60	15.2694
		1.06	3.65	1e+16	1.5	1000000000000000	60	100	16.5803					1.06	3.65	1e+16	1.5	1000000000000000	60	100	2.35039					1.06	3.65	1e+16	1.5	1000000000000000	60	100	15.2693
		1.06	3.65	1e+16	1.5	1000000000000000	100	20	16.9466					1.06	3.65	1e+16	1.5	1000000000000000	100	20	2.4413					1.06	3.65	1e+16	1.5	1000000000000000	100	20	15.6129
		1.06	3.65	1e+16	1.5	1000000000000000	100	60	16.9464					1.06	3.65	1e+16	1.5	1000000000000000	100	60	2.44123					1.06	3.65	1e+16	1.5	1000000000000000	100	60	15.6127
		1.06	3.65	1e+16	1.5	1000000000000000	100	100	16.9464					1.06	3.65	1e+16	1.5	1000000000000000	100	100	2.44121					1.06	3.65	1e+16	1.5	1000000000000000	100	100	15.6127
		1.06	3.65	1e+16	1.5	1e+16	20	20	8.42708					1.06	3.65	1e+16	1.5	1e+16	20	20	1.28427					1.06	3.65	1e+16	1.5	1e+16	20	20	7.70288
		1.06	3.65	1e+16	1.5	1e+16	20	60	8.4262					1.06	3.65	1e+16	1.5	1e+16	20	60	1.28439					1.06	3.65	1e+16	1.5	1e+16	20	60	7.70225
		1.06	3.65	1e+16	1.5	1e+16	20	100	8.42602					1.06	3.65	1e+16	1.5	1e+16	20	100	1.28441					1.06	3.65	1e+16	1.5	1e+16	20	100	7.70212
		1.06	3.65	1e+16	1.5	1e+16	60	20	10.3449					1.06	3.65	1e+16	1.5	1e+16	60	20	1.28156					1.06	3.65	1e+16	1.5	1e+16	60	20	9.40711
		1.06	3.65	1e+16	1.5	1e+16	60	60	10.3435					1.06	3.65	1e+16	1.5	1e+16	60	60	1.28168					1.06	3.65	1e+16	1.5	1e+16	60	60	9.40604
		1.06	3.65	1e+16	1.5	1e+16	60	100	10.3432					1.06	3.65	1e+16	1.5	1e+16	60	100	1.28171					1.06	3.65	1e+16	1.5	1e+16	60	100	9.40583
		1.06	3.65	1e+16	1.5	1e+16	100	20	11.0534					1.06	3.65	1e+16	1.5	1e+16	100	20	1.28086					1.06	3.65	1e+16	1.5	1e+16	100	20	10.0363
		1.06	3.65	1e+16	1.5	1e+16	100	60	11.0521					1.06	3.65	1e+16	1.5	1e+16	100	60	1.28099					1.06	3.65	1e+16	1.5	1e+16	100	60	10.0353
		1.06	3.65	1e+16	1.5	1e+16	100	100	11.0518					1.06	3.65	1e+16	1.5	1e+16	100	100	1.28102					1.06	3.65	1e+16	1.5	1e+16	100	100	10.0351
		1.06	3.65	1e+16	1.75	10000000000000	20	20	22.4493					1.06	3.65	1e+16	1.75	10000000000000	20	20	10.8487					1.06	3.65	1e+16	1.75	10000000000000	20	20	22.1157
		1.06	3.65	1e+16	1.75	10000000000000	20	60	22.4537					1.06	3.65	1e+16	1.75	10000000000000	20	60	10.8484					1.06	3.65	1e+16	1.75	10000000000000	20	60	22.1197
		1.06	3.65	1e+16	1.75	10000000000000	20	100	22.4545					1.06	3.65	1e+16	1.75	10000000000000	20	100	10.8483					1.06	3.65	1e+16	1.75	10000000000000	20	100	22.1205
		1.06	3.65	1e+16	1.75	10000000000000	60	20	22.5238					1.06	3.65	1e+16	1.75	10000000000000	60	20	10.9979					1.06	3.65	1e+16	1.75	10000000000000	60	20	22.2057
		1.06	3.65	1e+16	1.75	10000000000000	60	60	22.5283					1.06	3.65	1e+16	1.75	10000000000000	60	60	10.9976					1.06	3.65	1e+16	1.75	10000000000000	60	60	22.2099
		1.06	3.65	1e+16	1.75	10000000000000	60	100	22.5292					1.06	3.65	1e+16	1.75	10000000000000	60	100	10.9975					1.06	3.65	1e+16	1.75	10000000000000	60	100	22.2108
		1.06	3.65	1e+16	1.75	10000000000000	100	20	22.5389					1.06	3.65	1e+16	1.75	10000000000000	100	20	11.0294					1.06	3.65	1e+16	1.75	10000000000000	100	20	22.2241
		1.06	3.65	1e+16	1.75	10000000000000	100	60	22.5435					1.06	3.65	1e+16	1.75	10000000000000	100	60	11.0291					1.06	3.65	1e+16	1.75	10000000000000	100	60	22.2284
		1.06	3.65	1e+16	1.75	10000000000000	100	100	22.5444					1.06	3.65	1e+16	1.75	10000000000000	100	100	11.0291					1.06	3.65	1e+16	1.75	10000000000000	100	100	22.2292
		1.06	3.65	1e+16	1.75	100000000000000	20	20	20.4142					1.06	3.65	1e+16	1.75	100000000000000	20	20	5.21828					1.06	3.65	1e+16	1.75	100000000000000	20	20	19.4263
		1.06	3.65	1e+16	1.75	100000000000000	20	60	20.4155					1.06	3.65	1e+16	1.75	100000000000000	20	60	5.21795					1.06	3.65	1e+16	1.75	100000000000000	20	60	19.4269
		1.06	3.65	1e+16	1.75	100000000000000	20	100	20.4158					1.06	3.65	1e+16	1.75	100000000000000	20	100	5.21789					1.06	3.65	1e+16	1.75	100000000000000	20	100	19.427
		1.06	3.65	1e+16	1.75	100000000000000	60	20	20.9221					1.06	3.65	1e+16	1.75	100000000000000	60	20	5.5716					1.06	3.65	1e+16	1.75	100000000000000	60	20	19.9704
		1.06	3.65	1e+16	1.75	100000000000000	60	60	20.9242					1.06	3.65	1e+16	1.75	100000000000000	60	60	5.57154					1.06	3.65	1e+16	1.75	100000000000000	60	60	19.9717
		1.06	3.65	1e+16	1.75	100000000000000	60	100	20.9247					1.06	3.65	1e+16	1.75	100000000000000	60	100	5.57153					1.06	3.65	1e+16	1.75	100000000000000	60	100	19.972
		1.06	3.65	1e+16	1.75	100000000000000	100	20	21.0301					1.06	3.65	1e+16	1.75	100000000000000	100	20	5.65005					1.06	3.65	1e+16	1.75	100000000000000	100	20	20.0867
		1.06	3.65	1e+16	1.75	100000000000000	100	60	21.0324					1.06	3.65	1e+16	1.75	100000000000000	100	60	5.65006					1.06	3.65	1e+16	1.75	100000000000000	100	60	20.0882
		1.06	3.65	1e+16	1.75	100000000000000	100	100	21.0328					1.06	3.65	1e+16	1.75	100000000000000	100	100	5.65006					1.06	3.65	1e+16	1.75	100000000000000	100	100	20.0885
		1.06	3.65	1e+16	1.75	1000000000000000	20	20	14.7535					1.06	3.65	1e+16	1.75	1000000000000000	20	20	1.88627					1.06	3.65	1e+16	1.75	1000000000000000	20	20	13.5525
		1.06	3.65	1e+16	1.75	1000000000000000	20	60	14.7517					1.06	3.65	1e+16	1.75	1000000000000000	20	60	1.88604					1.06	3.65	1e+16	1.75	1000000000000000	20	60	13.5509
		1.06	3.65	1e+16	1.75	1000000000000000	20	100	14.7513					1.06	3.65	1e+16	1.75	1000000000000000	20	100	1.88599					1.06	3.65	1e+16	1.75	1000000000000000	20	100	13.5505
		1.06	3.65	1e+16	1.75	1000000000000000	60	20	16.3141					1.06	3.65	1e+16	1.75	1000000000000000	60	20	2.19213					1.06	3.65	1e+16	1.75	1000000000000000	60	20	14.9985
		1.06	3.65	1e+16	1.75	1000000000000000	60	60	16.3134					1.06	3.65	1e+16	1.75	1000000000000000	60	60	2.19198					1.06	3.65	1e+16	1.75	1000000000000000	60	60	14.9977
		1.06	3.65	1e+16	1.75	1000000000000000	60	100	16.3132					1.06	3.65	1e+16	1.75	1000000000000000	60	100	2.19195					1.06	3.65	1e+16	1.75	1000000000000000	60	100	14.9976
		1.06	3.65	1e+16	1.75	1000000000000000	100	20	16.7095					1.06	3.65	1e+16	1.75	1000000000000000	100	20	2.27759					1.06	3.65	1e+16	1.75	1000000000000000	100	20	15.3658
		1.06	3.65	1e+16	1.75	1000000000000000	100	60	16.7091					1.06	3.65	1e+16	1.75	1000000000000000	100	60	2.27748					1.06	3.65	1e+16	1.75	1000000000000000	100	60	15.3654
		1.06	3.65	1e+16	1.75	1000000000000000	100	100	16.7091					1.06	3.65	1e+16	1.75	1000000000000000	100	100	2.27746					1.06	3.65	1e+16	1.75	1000000000000000	100	100	15.3654
		1.06	3.65	1e+16	1.75	1e+16	20	20	8.32276					1.06	3.65	1e+16	1.75	1e+16	20	20	1.28393					1.06	3.65	1e+16	1.75	1e+16	20	20	7.60905
		1.06	3.65	1e+16	1.75	1e+16	20	60	8.32207					1.06	3.65	1e+16	1.75	1e+16	20	60	1.28406					1.06	3.65	1e+16	1.75	1e+16	20	60	7.60862
		1.06	3.65	1e+16	1.75	1e+16	20	100	8.32193					1.06	3.65	1e+16	1.75	1e+16	20	100	1.28409					1.06	3.65	1e+16	1.75	1e+16	20	100	7.60854
		1.06	3.65	1e+16	1.75	1e+16	60	20	10.0896					1.06	3.65	1e+16	1.75	1e+16	60	20	1.2808					1.06	3.65	1e+16	1.75	1e+16	60	20	9.17629
		1.06	3.65	1e+16	1.75	1e+16	60	60	10.0881					1.06	3.65	1e+16	1.75	1e+16	60	60	1.28096					1.06	3.65	1e+16	1.75	1e+16	60	60	9.17521
		1.06	3.65	1e+16	1.75	1e+16	60	100	10.0878					1.06	3.65	1e+16	1.75	1e+16	60	100	1.28099					1.06	3.65	1e+16	1.75	1e+16	60	100	9.17499
		1.06	3.65	1e+16	1.75	1e+16	100	20	10.7587					1.06	3.65	1e+16	1.75	1e+16	100	20	1.27996					1.06	3.65	1e+16	1.75	1e+16	100	20	9.76901
		1.06	3.65	1e+16	1.75	1e+16	100	60	10.7571					1.06	3.65	1e+16	1.75	1e+16	100	60	1.28012					1.06	3.65	1e+16	1.75	1e+16	100	60	9.76788
		1.06	3.65	1e+16	1.75	1e+16	100	100	10.7568					1.06	3.65	1e+16	1.75	1e+16	100	100	1.28015					1.06	3.65	1e+16	1.75	1e+16	100	100	9.76765
		1.06	3.65	1e+17	0.75	10000000000000	20	20	20.6925					1.06	3.65	1e+17	0.75	10000000000000	20	20	15.181					1.06	3.65	1e+17	0.75	10000000000000	20	20	20.5389
		1.06	3.65	1e+17	0.75	10000000000000	20	60	20.6927					1.06	3.65	1e+17	0.75	10000000000000	20	60	15.181					1.06	3.65	1e+17	0.75	10000000000000	20	60	20.5391
		1.06	3.65	1e+17	0.75	10000000000000	20	100	20.6927					1.06	3.65	1e+17	0.75	10000000000000	20	100	15.181					1.06	3.65	1e+17	0.75	10000000000000	20	100	20.5391
		1.06	3.65	1e+17	0.75	10000000000000	60	20	20.6986					1.06	3.65	1e+17	0.75	10000000000000	60	20	15.2715					1.06	3.65	1e+17	0.75	10000000000000	60	20	20.5459
		1.06	3.65	1e+17	0.75	10000000000000	60	60	20.6988					1.06	3.65	1e+17	0.75	10000000000000	60	60	15.2715					1.06	3.65	1e+17	0.75	10000000000000	60	60	20.5461
		1.06	3.65	1e+17	0.75	10000000000000	60	100	20.6988					1.06	3.65	1e+17	0.75	10000000000000	60	100	15.2715					1.06	3.65	1e+17	0.75	10000000000000	60	100	20.5461
		1.06	3.65	1e+17	0.75	10000000000000	100	20	20.6998					1.06	3.65	1e+17	0.75	10000000000000	100	20	15.2899					1.06	3.65	1e+17	0.75	10000000000000	100	20	20.5473
		1.06	3.65	1e+17	0.75	10000000000000	100	60	20.7					1.06	3.65	1e+17	0.75	10000000000000	100	60	15.2899					1.06	3.65	1e+17	0.75	10000000000000	100	60	20.5475
		1.06	3.65	1e+17	0.75	10000000000000	100	100	20.7					1.06	3.65	1e+17	0.75	10000000000000	100	100	15.2899					1.06	3.65	1e+17	0.75	10000000000000	100	100	20.5475
		1.06	3.65	1e+17	0.75	100000000000000	20	20	20.5343					1.06	3.65	1e+17	0.75	100000000000000	20	20	10.2183					1.06	3.65	1e+17	0.75	100000000000000	20	20	20.317
		1.06	3.65	1e+17	0.75	100000000000000	20	60	20.5344					1.06	3.65	1e+17	0.75	100000000000000	20	60	10.2183					1.06	3.65	1e+17	0.75	100000000000000	20	60	20.3172
		1.06	3.65	1e+17	0.75	100000000000000	20	100	20.5345					1.06	3.65	1e+17	0.75	100000000000000	20	100	10.2183					1.06	3.65	1e+17	0.75	100000000000000	20	100	20.3172
		1.06	3.65	1e+17	0.75	100000000000000	60	20	20.5927					1.06	3.65	1e+17	0.75	100000000000000	60	20	10.3949					1.06	3.65	1e+17	0.75	100000000000000	60	20	20.3833
		1.06	3.65	1e+17	0.75	100000000000000	60	60	20.5928					1.06	3.65	1e+17	0.75	100000000000000	60	60	10.3949					1.06	3.65	1e+17	0.75	100000000000000	60	60	20.3835
		1.06	3.65	1e+17	0.75	100000000000000	60	100	20.5929					1.06	3.65	1e+17	0.75	100000000000000	60	100	10.3949					1.06	3.65	1e+17	0.75	100000000000000	60	100	20.3835
		1.06	3.65	1e+17	0.75	100000000000000	100	20	20.6044					1.06	3.65	1e+17	0.75	100000000000000	100	20	10.4313					1.06	3.65	1e+17	0.75	100000000000000	100	20	20.3967
		1.06	3.65	1e+17	0.75	100000000000000	100	60	20.6046					1.06	3.65	1e+17	0.75	100000000000000	100	60	10.4313					1.06	3.65	1e+17	0.75	100000000000000	100	60	20.3968
		1.06	3.65	1e+17	0.75	100000000000000	100	100	20.6046					1.06	3.65	1e+17	0.75	100000000000000	100	100	10.4313					1.06	3.65	1e+17	0.75	100000000000000	100	100	20.3968
		1.06	3.65	1e+17	0.75	1000000000000000	20	20	19.2367					1.06	3.65	1e+17	0.75	1000000000000000	20	20	5.91529					1.06	3.65	1e+17	0.75	1000000000000000	20	20	18.6335
		1.06	3.65	1e+17	0.75	1000000000000000	20	60	19.2368					1.06	3.65	1e+17	0.75	1000000000000000	20	60	5.91529					1.06	3.65	1e+17	0.75	1000000000000000	20	60	18.6336
		1.06	3.65	1e+17	0.75	1000000000000000	20	100	19.2368					1.06	3.65	1e+17	0.75	1000000000000000	20	100	5.91529					1.06	3.65	1e+17	0.75	1000000000000000	20	100	18.6336
		1.06	3.65	1e+17	0.75	1000000000000000	60	20	19.7116					1.06	3.65	1e+17	0.75	1000000000000000	60	20	6.24427					1.06	3.65	1e+17	0.75	1000000000000000	60	20	19.1295
		1.06	3.65	1e+17	0.75	1000000000000000	60	60	19.7117					1.06	3.65	1e+17	0.75	1000000000000000	60	60	6.24428					1.06	3.65	1e+17	0.75	1000000000000000	60	60	19.1296
		1.06	3.65	1e+17	0.75	1000000000000000	60	100	19.7117					1.06	3.65	1e+17	0.75	1000000000000000	60	100	6.24428					1.06	3.65	1e+17	0.75	1000000000000000	60	100	19.1296
		1.06	3.65	1e+17	0.75	1000000000000000	100	20	19.811					1.06	3.65	1e+17	0.75	1000000000000000	100	20	6.31605					1.06	3.65	1e+17	0.75	1000000000000000	100	20	19.234
		1.06	3.65	1e+17	0.75	1000000000000000	100	60	19.8111					1.06	3.65	1e+17	0.75	1000000000000000	100	60	6.31606					1.06	3.65	1e+17	0.75	1000000000000000	100	60	19.234
		1.06	3.65	1e+17	0.75	1000000000000000	100	100	19.8111					1.06	3.65	1e+17	0.75	1000000000000000	100	100	6.31606					1.06	3.65	1e+17	0.75	1000000000000000	100	100	19.2341
		1.06	3.65	1e+17	0.75	1e+16	20	20	13.9289					1.06	3.65	1e+17	0.75	1e+16	20	20	2.50283					1.06	3.65	1e+17	0.75	1e+16	20	20	13.0107
		1.06	3.65	1e+17	0.75	1e+16	20	60	13.9288					1.06	3.65	1e+17	0.75	1e+16	20	60	2.50282					1.06	3.65	1e+17	0.75	1e+16	20	60	13.0106
		1.06	3.65	1e+17	0.75	1e+16	20	100	13.9288					1.06	3.65	1e+17	0.75	1e+16	20	100	2.50282					1.06	3.65	1e+17	0.75	1e+16	20	100	13.0106
		1.06	3.65	1e+17	0.75	1e+16	60	20	15.8504					1.06	3.65	1e+17	0.75	1e+16	60	20	2.8765					1.06	3.65	1e+17	0.75	1e+16	60	20	14.7742
		1.06	3.65	1e+17	0.75	1e+16	60	60	15.8504					1.06	3.65	1e+17	0.75	1e+16	60	60	2.8765					1.06	3.65	1e+17	0.75	1e+16	60	60	14.7741
		1.06	3.65	1e+17	0.75	1e+16	60	100	15.8504					1.06	3.65	1e+17	0.75	1e+16	60	100	2.8765					1.06	3.65	1e+17	0.75	1e+16	60	100	14.7741
		1.06	3.65	1e+17	0.75	1e+16	100	20	16.358					1.06	3.65	1e+17	0.75	1e+16	100	20	2.9782					1.06	3.65	1e+17	0.75	1e+16	100	20	15.2397
		1.06	3.65	1e+17	0.75	1e+16	100	60	16.358					1.06	3.65	1e+17	0.75	1e+16	100	60	2.97821					1.06	3.65	1e+17	0.75	1e+16	100	60	15.2397
		1.06	3.65	1e+17	0.75	1e+16	100	100	16.358					1.06	3.65	1e+17	0.75	1e+16	100	100	2.97821					1.06	3.65	1e+17	0.75	1e+16	100	100	15.2397
		1.06	3.65	1e+17	1	10000000000000	20	20	21.7101					1.06	3.65	1e+17	1	10000000000000	20	20	15.2278					1.06	3.65	1e+17	1	10000000000000	20	20	21.5386
		1.06	3.65	1e+17	1	10000000000000	20	60	21.7104					1.06	3.65	1e+17	1	10000000000000	20	60	15.2278					1.06	3.65	1e+17	1	10000000000000	20	60	21.5389
		1.06	3.65	1e+17	1	10000000000000	20	100	21.7104					1.06	3.65	1e+17	1	10000000000000	20	100	15.2278					1.06	3.65	1e+17	1	10000000000000	20	100	21.5389
		1.06	3.65	1e+17	1	10000000000000	60	20	21.7195					1.06	3.65	1e+17	1	10000000000000	60	20	15.3334					1.06	3.65	1e+17	1	10000000000000	60	20	21.5493
		1.06	3.65	1e+17	1	10000000000000	60	60	21.7197					1.06	3.65	1e+17	1	10000000000000	60	60	15.3334					1.06	3.65	1e+17	1	10000000000000	60	60	21.5495
		1.06	3.65	1e+17	1	10000000000000	60	100	21.7198					1.06	3.65	1e+17	1	10000000000000	60	100	15.3334					1.06	3.65	1e+17	1	10000000000000	60	100	21.5496
		1.06	3.65	1e+17	1	10000000000000	100	20	21.7214					1.06	3.65	1e+17	1	10000000000000	100	20	15.3549					1.06	3.65	1e+17	1	10000000000000	100	20	21.5514
		1.06	3.65	1e+17	1	10000000000000	100	60	21.7216					1.06	3.65	1e+17	1	10000000000000	100	60	15.3549					1.06	3.65	1e+17	1	10000000000000	100	60	21.5517
		1.06	3.65	1e+17	1	10000000000000	100	100	21.7217					1.06	3.65	1e+17	1	10000000000000	100	100	15.3549					1.06	3.65	1e+17	1	10000000000000	100	100	21.5517
		1.06	3.65	1e+17	1	100000000000000	20	20	21.4754					1.06	3.65	1e+17	1	100000000000000	20	20	10.0572					1.06	3.65	1e+17	1	100000000000000	20	20	21.2146
		1.06	3.65	1e+17	1	100000000000000	20	60	21.4756					1.06	3.65	1e+17	1	100000000000000	20	60	10.0572					1.06	3.65	1e+17	1	100000000000000	20	60	21.2148
		1.06	3.65	1e+17	1	100000000000000	20	100	21.4756					1.06	3.65	1e+17	1	100000000000000	20	100	10.0572					1.06	3.65	1e+17	1	100000000000000	20	100	21.2148
		1.06	3.65	1e+17	1	100000000000000	60	20	21.5648					1.06	3.65	1e+17	1	100000000000000	60	20	10.2583					1.06	3.65	1e+17	1	100000000000000	60	20	21.3145
		1.06	3.65	1e+17	1	100000000000000	60	60	21.5651					1.06	3.65	1e+17	1	100000000000000	60	60	10.2583					1.06	3.65	1e+17	1	100000000000000	60	60	21.3147
		1.06	3.65	1e+17	1	100000000000000	60	100	21.5651					1.06	3.65	1e+17	1	100000000000000	60	100	10.2583					1.06	3.65	1e+17	1	100000000000000	60	100	21.3147
		1.06	3.65	1e+17	1	100000000000000	100	20	21.5829					1.06	3.65	1e+17	1	100000000000000	100	20	10.3					1.06	3.65	1e+17	1	100000000000000	100	20	21.3347
		1.06	3.65	1e+17	1	100000000000000	100	60	21.5831					1.06	3.65	1e+17	1	100000000000000	100	60	10.3					1.06	3.65	1e+17	1	100000000000000	100	60	21.3349
		1.06	3.65	1e+17	1	100000000000000	100	100	21.5832					1.06	3.65	1e+17	1	100000000000000	100	100	10.3					1.06	3.65	1e+17	1	100000000000000	100	100	21.3349
		1.06	3.65	1e+17	1	1000000000000000	20	20	19.6717					1.06	3.65	1e+17	1	1000000000000000	20	20	5.65223					1.06	3.65	1e+17	1	1000000000000000	20	20	18.9497
		1.06	3.65	1e+17	1	1000000000000000	20	60	19.6717					1.06	3.65	1e+17	1	1000000000000000	20	60	5.65222					1.06	3.65	1e+17	1	1000000000000000	20	60	18.9497
		1.06	3.65	1e+17	1	1000000000000000	20	100	19.6717					1.06	3.65	1e+17	1	1000000000000000	20	100	5.65221					1.06	3.65	1e+17	1	1000000000000000	20	100	18.9497
		1.06	3.65	1e+17	1	1000000000000000	60	20	20.3474					1.06	3.65	1e+17	1	1000000000000000	60	20	6.01956					1.06	3.65	1e+17	1	1000000000000000	60	20	19.6345
		1.06	3.65	1e+17	1	1000000000000000	60	60	20.3475					1.06	3.65	1e+17	1	1000000000000000	60	60	6.01956					1.06	3.65	1e+17	1	1000000000000000	60	60	19.6346
		1.06	3.65	1e+17	1	1000000000000000	60	100	20.3475					1.06	3.65	1e+17	1	1000000000000000	60	100	6.01956					1.06	3.65	1e+17	1	1000000000000000	60	100	19.6346
		1.06	3.65	1e+17	1	1000000000000000	100	20	20.4926					1.06	3.65	1e+17	1	1000000000000000	100	20	6.1015					1.06	3.65	1e+17	1	1000000000000000	100	20	19.7821
		1.06	3.65	1e+17	1	1000000000000000	100	60	20.4928					1.06	3.65	1e+17	1	1000000000000000	100	60	6.10151					1.06	3.65	1e+17	1	1000000000000000	100	60	19.7822
		1.06	3.65	1e+17	1	1000000000000000	100	100	20.4928					1.06	3.65	1e+17	1	1000000000000000	100	100	6.10152					1.06	3.65	1e+17	1	1000000000000000	100	100	19.7822
		1.06	3.65	1e+17	1	1e+16	20	20	13.5288					1.06	3.65	1e+17	1	1e+16	20	20	2.3361					1.06	3.65	1e+17	1	1e+16	20	20	12.6185
		1.06	3.65	1e+17	1	1e+16	20	60	13.5287					1.06	3.65	1e+17	1	1e+16	20	60	2.3361					1.06	3.65	1e+17	1	1e+16	20	60	12.6184
		1.06	3.65	1e+17	1	1e+16	20	100	13.5287					1.06	3.65	1e+17	1	1e+16	20	100	2.3361					1.06	3.65	1e+17	1	1e+16	20	100	12.6184
		1.06	3.65	1e+17	1	1e+16	60	20	15.6831					1.06	3.65	1e+17	1	1e+16	60	20	2.6557					1.06	3.65	1e+17	1	1e+16	60	20	14.5707
		1.06	3.65	1e+17	1	1e+16	60	60	15.683					1.06	3.65	1e+17	1	1e+16	60	60	2.6557					1.06	3.65	1e+17	1	1e+16	60	60	14.5707
		1.06	3.65	1e+17	1	1e+16	60	100	15.683					1.06	3.65	1e+17	1	1e+16	60	100	2.6557					1.06	3.65	1e+17	1	1e+16	60	100	14.5707
		1.06	3.65	1e+17	1	1e+16	100	20	16.3201					1.06	3.65	1e+17	1	1e+16	100	20	2.7491					1.06	3.65	1e+17	1	1e+16	100	20	15.1468
		1.06	3.65	1e+17	1	1e+16	100	60	16.32					1.06	3.65	1e+17	1	1e+16	100	60	2.7491					1.06	3.65	1e+17	1	1e+16	100	60	15.1467
		1.06	3.65	1e+17	1	1e+16	100	100	16.32					1.06	3.65	1e+17	1	1e+16	100	100	2.7491					1.06	3.65	1e+17	1	1e+16	100	100	15.1467
		1.06	3.65	1e+17	1.25	10000000000000	20	20	22.245					1.06	3.65	1e+17	1.25	10000000000000	20	20	15.0516					1.06	3.65	1e+17	1.25	10000000000000	20	20	22.0636
		1.06	3.65	1e+17	1.25	10000000000000	20	60	22.2453					1.06	3.65	1e+17	1.25	10000000000000	20	60	15.0516					1.06	3.65	1e+17	1.25	10000000000000	20	60	22.0639
		1.06	3.65	1e+17	1.25	10000000000000	20	100	22.2453					1.06	3.65	1e+17	1.25	10000000000000	20	100	15.0516					1.06	3.65	1e+17	1.25	10000000000000	20	100	22.064
		1.06	3.65	1e+17	1.25	10000000000000	60	20	22.2578					1.06	3.65	1e+17	1.25	10000000000000	60	20	15.1684					1.06	3.65	1e+17	1.25	10000000000000	60	20	22.078
		1.06	3.65	1e+17	1.25	10000000000000	60	60	22.2581					1.06	3.65	1e+17	1.25	10000000000000	60	60	15.1684					1.06	3.65	1e+17	1.25	10000000000000	60	60	22.0784
		1.06	3.65	1e+17	1.25	10000000000000	60	100	22.2582					1.06	3.65	1e+17	1.25	10000000000000	60	100	15.1684					1.06	3.65	1e+17	1.25	10000000000000	60	100	22.0784
		1.06	3.65	1e+17	1.25	10000000000000	100	20	22.2604					1.06	3.65	1e+17	1.25	10000000000000	100	20	15.1922					1.06	3.65	1e+17	1.25	10000000000000	100	20	22.0809
		1.06	3.65	1e+17	1.25	10000000000000	100	60	22.2607					1.06	3.65	1e+17	1.25	10000000000000	100	60	15.1922					1.06	3.65	1e+17	1.25	10000000000000	100	60	22.0813
		1.06	3.65	1e+17	1.25	10000000000000	100	100	22.2607					1.06	3.65	1e+17	1.25	10000000000000	100	100	15.1922					1.06	3.65	1e+17	1.25	10000000000000	100	100	22.0813
		1.06	3.65	1e+17	1.25	100000000000000	20	20	21.934					1.06	3.65	1e+17	1.25	100000000000000	20	20	9.80544					1.06	3.65	1e+17	1.25	100000000000000	20	20	21.6395
		1.06	3.65	1e+17	1.25	100000000000000	20	60	21.9343					1.06	3.65	1e+17	1.25	100000000000000	20	60	9.80542					1.06	3.65	1e+17	1.25	100000000000000	20	60	21.6398
		1.06	3.65	1e+17	1.25	100000000000000	20	100	21.9343					1.06	3.65	1e+17	1.25	100000000000000	20	100	9.80542					1.06	3.65	1e+17	1.25	100000000000000	20	100	21.6398
		1.06	3.65	1e+17	1.25	100000000000000	60	20	22.0551					1.06	3.65	1e+17	1.25	100000000000000	60	20	10.0247					1.06	3.65	1e+17	1.25	100000000000000	60	20	21.7731
		1.06	3.65	1e+17	1.25	100000000000000	60	60	22.0554					1.06	3.65	1e+17	1.25	100000000000000	60	60	10.0247					1.06	3.65	1e+17	1.25	100000000000000	60	60	21.7734
		1.06	3.65	1e+17	1.25	100000000000000	60	100	22.0555					1.06	3.65	1e+17	1.25	100000000000000	60	100	10.0247					1.06	3.65	1e+17	1.25	100000000000000	60	100	21.7735
		1.06	3.65	1e+17	1.25	100000000000000	100	20	22.0797					1.06	3.65	1e+17	1.25	100000000000000	100	20	10.0703					1.06	3.65	1e+17	1.25	100000000000000	100	20	21.8002
		1.06	3.65	1e+17	1.25	100000000000000	100	60	22.08					1.06	3.65	1e+17	1.25	100000000000000	100	60	10.0703					1.06	3.65	1e+17	1.25	100000000000000	100	60	21.8005
		1.06	3.65	1e+17	1.25	100000000000000	100	100	22.08					1.06	3.65	1e+17	1.25	100000000000000	100	100	10.0703					1.06	3.65	1e+17	1.25	100000000000000	100	100	21.8006
		1.06	3.65	1e+17	1.25	1000000000000000	20	20	19.6912					1.06	3.65	1e+17	1.25	1000000000000000	20	20	5.38278					1.06	3.65	1e+17	1.25	1000000000000000	20	20	18.8889
		1.06	3.65	1e+17	1.25	1000000000000000	20	60	19.6912					1.06	3.65	1e+17	1.25	1000000000000000	20	60	5.38277					1.06	3.65	1e+17	1.25	1000000000000000	20	60	18.8889
		1.06	3.65	1e+17	1.25	1000000000000000	20	100	19.6912					1.06	3.65	1e+17	1.25	1000000000000000	20	100	5.38276					1.06	3.65	1e+17	1.25	1000000000000000	20	100	18.8889
		1.06	3.65	1e+17	1.25	1000000000000000	60	20	20.5387					1.06	3.65	1e+17	1.25	1000000000000000	60	20	5.76688					1.06	3.65	1e+17	1.25	1000000000000000	60	20	19.7296
		1.06	3.65	1e+17	1.25	1000000000000000	60	60	20.5389					1.06	3.65	1e+17	1.25	1000000000000000	60	60	5.76688					1.06	3.65	1e+17	1.25	1000000000000000	60	60	19.7297
		1.06	3.65	1e+17	1.25	1000000000000000	60	100	20.5389					1.06	3.65	1e+17	1.25	1000000000000000	60	100	5.76688					1.06	3.65	1e+17	1.25	1000000000000000	60	100	19.7297
		1.06	3.65	1e+17	1.25	1000000000000000	100	20	20.7261					1.06	3.65	1e+17	1.25	1000000000000000	100	20	5.85449					1.06	3.65	1e+17	1.25	1000000000000000	100	20	19.918
		1.06	3.65	1e+17	1.25	1000000000000000	100	60	20.7262					1.06	3.65	1e+17	1.25	1000000000000000	100	60	5.8545					1.06	3.65	1e+17	1.25	1000000000000000	100	60	19.9181
		1.06	3.65	1e+17	1.25	1000000000000000	100	100	20.7263					1.06	3.65	1e+17	1.25	1000000000000000	100	100	5.8545					1.06	3.65	1e+17	1.25	1000000000000000	100	100	19.9182
		1.06	3.65	1e+17	1.25	1e+16	20	20	13.1993					1.06	3.65	1e+17	1.25	1e+16	20	20	2.23748					1.06	3.65	1e+17	1.25	1e+16	20	20	12.3052
		1.06	3.65	1e+17	1.25	1e+16	20	60	13.1992					1.06	3.65	1e+17	1.25	1e+16	20	60	2.23749					1.06	3.65	1e+17	1.25	1e+16	20	60	12.3051
		1.06	3.65	1e+17	1.25	1e+16	20	100	13.1992					1.06	3.65	1e+17	1.25	1e+16	20	100	2.23749					1.06	3.65	1e+17	1.25	1e+16	20	100	12.305
		1.06	3.65	1e+17	1.25	1e+16	60	20	15.3543					1.06	3.65	1e+17	1.25	1e+16	60	20	2.48971					1.06	3.65	1e+17	1.25	1e+16	60	20	14.2406
		1.06	3.65	1e+17	1.25	1e+16	60	60	15.3542					1.06	3.65	1e+17	1.25	1e+16	60	60	2.48972					1.06	3.65	1e+17	1.25	1e+16	60	60	14.2405
		1.06	3.65	1e+17	1.25	1e+16	60	100	15.3542					1.06	3.65	1e+17	1.25	1e+16	60	100	2.48972					1.06	3.65	1e+17	1.25	1e+16	60	100	14.2405
		1.06	3.65	1e+17	1.25	1e+16	100	20	16.0558					1.06	3.65	1e+17	1.25	1e+16	100	20	2.56506					1.06	3.65	1e+17	1.25	1e+16	100	20	14.8686
		1.06	3.65	1e+17	1.25	1e+16	100	60	16.0557					1.06	3.65	1e+17	1.25	1e+16	100	60	2.56506					1.06	3.65	1e+17	1.25	1e+16	100	60	14.8685
		1.06	3.65	1e+17	1.25	1e+16	100	100	16.0557					1.06	3.65	1e+17	1.25	1e+16	100	100	2.56507					1.06	3.65	1e+17	1.25	1e+16	100	100	14.8685
		1.06	3.65	1e+17	1.5	10000000000000	20	20	22.5495					1.06	3.65	1e+17	1.5	10000000000000	20	20	14.802					1.06	3.65	1e+17	1.5	10000000000000	20	20	22.3614
		1.06	3.65	1e+17	1.5	10000000000000	20	60	22.55					1.06	3.65	1e+17	1.5	10000000000000	20	60	14.802					1.06	3.65	1e+17	1.5	10000000000000	20	60	22.3618
		1.06	3.65	1e+17	1.5	10000000000000	20	100	22.55					1.06	3.65	1e+17	1.5	10000000000000	20	100	14.802					1.06	3.65	1e+17	1.5	10000000000000	20	100	22.3619
		1.06	3.65	1e+17	1.5	10000000000000	60	20	22.5659					1.06	3.65	1e+17	1.5	10000000000000	60	20	14.9273					1.06	3.65	1e+17	1.5	10000000000000	60	20	22.3797
		1.06	3.65	1e+17	1.5	10000000000000	60	60	22.5663					1.06	3.65	1e+17	1.5	10000000000000	60	60	14.9272					1.06	3.65	1e+17	1.5	10000000000000	60	60	22.3801
		1.06	3.65	1e+17	1.5	10000000000000	60	100	22.5664					1.06	3.65	1e+17	1.5	10000000000000	60	100	14.9272					1.06	3.65	1e+17	1.5	10000000000000	60	100	22.3802
		1.06	3.65	1e+17	1.5	10000000000000	100	20	22.5692					1.06	3.65	1e+17	1.5	10000000000000	100	20	14.9528					1.06	3.65	1e+17	1.5	10000000000000	100	20	22.3834
		1.06	3.65	1e+17	1.5	10000000000000	100	60	22.5696					1.06	3.65	1e+17	1.5	10000000000000	100	60	14.9528					1.06	3.65	1e+17	1.5	10000000000000	100	60	22.3838
		1.06	3.65	1e+17	1.5	10000000000000	100	100	22.5697					1.06	3.65	1e+17	1.5	10000000000000	100	100	14.9528					1.06	3.65	1e+17	1.5	10000000000000	100	100	22.3839
		1.06	3.65	1e+17	1.5	100000000000000	20	20	22.1637					1.06	3.65	1e+17	1.5	100000000000000	20	20	9.5488					1.06	3.65	1e+17	1.5	100000000000000	20	20	21.8405
		1.06	3.65	1e+17	1.5	100000000000000	20	60	22.1641					1.06	3.65	1e+17	1.5	100000000000000	20	60	9.54877					1.06	3.65	1e+17	1.5	100000000000000	20	60	21.8408
		1.06	3.65	1e+17	1.5	100000000000000	20	100	22.1641					1.06	3.65	1e+17	1.5	100000000000000	20	100	9.54877					1.06	3.65	1e+17	1.5	100000000000000	20	100	21.8409
		1.06	3.65	1e+17	1.5	100000000000000	60	20	22.3163					1.06	3.65	1e+17	1.5	100000000000000	60	20	9.78237					1.06	3.65	1e+17	1.5	100000000000000	60	20	22.007
		1.06	3.65	1e+17	1.5	100000000000000	60	60	22.3166					1.06	3.65	1e+17	1.5	100000000000000	60	60	9.78236					1.06	3.65	1e+17	1.5	100000000000000	60	60	22.0074
		1.06	3.65	1e+17	1.5	100000000000000	60	100	22.3167					1.06	3.65	1e+17	1.5	100000000000000	60	100	9.78236					1.06	3.65	1e+17	1.5	100000000000000	60	100	22.0075
		1.06	3.65	1e+17	1.5	100000000000000	100	20	22.3473					1.06	3.65	1e+17	1.5	100000000000000	100	20	9.83121					1.06	3.65	1e+17	1.5	100000000000000	100	20	22.041
		1.06	3.65	1e+17	1.5	100000000000000	100	60	22.3477					1.06	3.65	1e+17	1.5	100000000000000	100	60	9.83121					1.06	3.65	1e+17	1.5	100000000000000	100	60	22.0413
		1.06	3.65	1e+17	1.5	100000000000000	100	100	22.3478					1.06	3.65	1e+17	1.5	100000000000000	100	100	9.83121					1.06	3.65	1e+17	1.5	100000000000000	100	100	22.0414
		1.06	3.65	1e+17	1.5	1000000000000000	20	20	19.5495					1.06	3.65	1e+17	1.5	1000000000000000	20	20	5.14943					1.06	3.65	1e+17	1.5	1000000000000000	20	20	18.6962
		1.06	3.65	1e+17	1.5	1000000000000000	20	60	19.5495					1.06	3.65	1e+17	1.5	1000000000000000	20	60	5.14941					1.06	3.65	1e+17	1.5	1000000000000000	20	60	18.6962
		1.06	3.65	1e+17	1.5	1000000000000000	20	100	19.5495					1.06	3.65	1e+17	1.5	1000000000000000	20	100	5.1494					1.06	3.65	1e+17	1.5	1000000000000000	20	100	18.6962
		1.06	3.65	1e+17	1.5	1000000000000000	60	20	20.5354					1.06	3.65	1e+17	1.5	1000000000000000	60	20	5.53631					1.06	3.65	1e+17	1.5	1000000000000000	60	20	19.6566
		1.06	3.65	1e+17	1.5	1000000000000000	60	60	20.5355					1.06	3.65	1e+17	1.5	1000000000000000	60	60	5.53631					1.06	3.65	1e+17	1.5	1000000000000000	60	60	19.6567
		1.06	3.65	1e+17	1.5	1000000000000000	60	100	20.5355					1.06	3.65	1e+17	1.5	1000000000000000	60	100	5.53631					1.06	3.65	1e+17	1.5	1000000000000000	60	100	19.6567
		1.06	3.65	1e+17	1.5	1000000000000000	100	20	20.76					1.06	3.65	1e+17	1.5	1000000000000000	100	20	5.62648					1.06	3.65	1e+17	1.5	1000000000000000	100	20	19.8756
		1.06	3.65	1e+17	1.5	1000000000000000	100	60	20.7602					1.06	3.65	1e+17	1.5	1000000000000000	100	60	5.62649					1.06	3.65	1e+17	1.5	1000000000000000	100	60	19.8757
		1.06	3.65	1e+17	1.5	1000000000000000	100	100	20.7602					1.06	3.65	1e+17	1.5	1000000000000000	100	100	5.62649					1.06	3.65	1e+17	1.5	1000000000000000	100	100	19.8757
		1.06	3.65	1e+17	1.5	1e+16	20	20	12.9901					1.06	3.65	1e+17	1.5	1e+16	20	20	2.18296					1.06	3.65	1e+17	1.5	1e+16	20	20	12.1081
		1.06	3.65	1e+17	1.5	1e+16	20	60	12.99					1.06	3.65	1e+17	1.5	1e+16	20	60	2.18298					1.06	3.65	1e+17	1.5	1e+16	20	60	12.108
		1.06	3.65	1e+17	1.5	1e+16	20	100	12.99					1.06	3.65	1e+17	1.5	1e+16	20	100	2.18298					1.06	3.65	1e+17	1.5	1e+16	20	100	12.108
		1.06	3.65	1e+17	1.5	1e+16	60	20	15.0378					1.06	3.65	1e+17	1.5	1e+16	60	20	2.36859					1.06	3.65	1e+17	1.5	1e+16	60	20	13.9335
		1.06	3.65	1e+17	1.5	1e+16	60	60	15.0376					1.06	3.65	1e+17	1.5	1e+16	60	60	2.3686					1.06	3.65	1e+17	1.5	1e+16	60	60	13.9333
		1.06	3.65	1e+17	1.5	1e+16	60	100	15.0376					1.06	3.65	1e+17	1.5	1e+16	60	100	2.3686					1.06	3.65	1e+17	1.5	1e+16	60	100	13.9333
		1.06	3.65	1e+17	1.5	1e+16	100	20	15.7527					1.06	3.65	1e+17	1.5	1e+16	100	20	2.42103					1.06	3.65	1e+17	1.5	1e+16	100	20	14.5699
		1.06	3.65	1e+17	1.5	1e+16	100	60	15.7526					1.06	3.65	1e+17	1.5	1e+16	100	60	2.42103					1.06	3.65	1e+17	1.5	1e+16	100	60	14.5698
		1.06	3.65	1e+17	1.5	1e+16	100	100	15.7526					1.06	3.65	1e+17	1.5	1e+16	100	100	2.42103					1.06	3.65	1e+17	1.5	1e+16	100	100	14.5697
		1.06	3.65	1e+17	1.75	10000000000000	20	20	22.7345					1.06	3.65	1e+17	1.75	10000000000000	20	20	14.5406					1.06	3.65	1e+17	1.75	10000000000000	20	20	22.5411
		1.06	3.65	1e+17	1.75	10000000000000	20	60	22.735					1.06	3.65	1e+17	1.75	10000000000000	20	60	14.5406					1.06	3.65	1e+17	1.75	10000000000000	20	60	22.5416
		1.06	3.65	1e+17	1.75	10000000000000	20	100	22.7351					1.06	3.65	1e+17	1.75	10000000000000	20	100	14.5406					1.06	3.65	1e+17	1.75	10000000000000	20	100	22.5417
		1.06	3.65	1e+17	1.75	10000000000000	60	20	22.7544					1.06	3.65	1e+17	1.75	10000000000000	60	20	14.6731					1.06	3.65	1e+17	1.75	10000000000000	60	20	22.5633
		1.06	3.65	1e+17	1.75	10000000000000	60	60	22.7549					1.06	3.65	1e+17	1.75	10000000000000	60	60	14.673					1.06	3.65	1e+17	1.75	10000000000000	60	60	22.5638
		1.06	3.65	1e+17	1.75	10000000000000	60	100	22.755					1.06	3.65	1e+17	1.75	10000000000000	60	100	14.673					1.06	3.65	1e+17	1.75	10000000000000	60	100	22.5639
		1.06	3.65	1e+17	1.75	10000000000000	100	20	22.7584					1.06	3.65	1e+17	1.75	10000000000000	100	20	14.7001					1.06	3.65	1e+17	1.75	10000000000000	100	20	22.5677
		1.06	3.65	1e+17	1.75	10000000000000	100	60	22.7589					1.06	3.65	1e+17	1.75	10000000000000	100	60	14.7001					1.06	3.65	1e+17	1.75	10000000000000	100	60	22.5682
		1.06	3.65	1e+17	1.75	10000000000000	100	100	22.759					1.06	3.65	1e+17	1.75	10000000000000	100	100	14.7					1.06	3.65	1e+17	1.75	10000000000000	100	100	22.5683
		1.06	3.65	1e+17	1.75	100000000000000	20	20	22.2756					1.06	3.65	1e+17	1.75	100000000000000	20	20	9.29667					1.06	3.65	1e+17	1.75	100000000000000	20	20	21.9268
		1.06	3.65	1e+17	1.75	100000000000000	20	60	22.2761					1.06	3.65	1e+17	1.75	100000000000000	20	60	9.29663					1.06	3.65	1e+17	1.75	100000000000000	20	60	21.9272
		1.06	3.65	1e+17	1.75	100000000000000	20	100	22.2761					1.06	3.65	1e+17	1.75	100000000000000	20	100	9.29663					1.06	3.65	1e+17	1.75	100000000000000	20	100	21.9272
		1.06	3.65	1e+17	1.75	100000000000000	60	20	22.4589					1.06	3.65	1e+17	1.75	100000000000000	60	20	9.54178					1.06	3.65	1e+17	1.75	100000000000000	60	20	22.1251
		1.06	3.65	1e+17	1.75	100000000000000	60	60	22.4593					1.06	3.65	1e+17	1.75	100000000000000	60	60	9.54176					1.06	3.65	1e+17	1.75	100000000000000	60	60	22.1255
		1.06	3.65	1e+17	1.75	100000000000000	60	100	22.4594					1.06	3.65	1e+17	1.75	100000000000000	60	100	9.54176					1.06	3.65	1e+17	1.75	100000000000000	60	100	22.1256
		1.06	3.65	1e+17	1.75	100000000000000	100	20	22.4964					1.06	3.65	1e+17	1.75	100000000000000	100	20	9.59317					1.06	3.65	1e+17	1.75	100000000000000	100	20	22.1657
		1.06	3.65	1e+17	1.75	100000000000000	100	60	22.4968					1.06	3.65	1e+17	1.75	100000000000000	100	60	9.59317					1.06	3.65	1e+17	1.75	100000000000000	100	60	22.1661
		1.06	3.65	1e+17	1.75	100000000000000	100	100	22.4969					1.06	3.65	1e+17	1.75	100000000000000	100	100	9.59316					1.06	3.65	1e+17	1.75	100000000000000	100	100	22.1662
		1.06	3.65	1e+17	1.75	1000000000000000	20	20	19.3531					1.06	3.65	1e+17	1.75	1000000000000000	20	20	4.95009					1.06	3.65	1e+17	1.75	1000000000000000	20	20	18.4656
		1.06	3.65	1e+17	1.75	1000000000000000	20	60	19.3531					1.06	3.65	1e+17	1.75	1000000000000000	20	60	4.95007					1.06	3.65	1e+17	1.75	1000000000000000	20	60	18.4655
		1.06	3.65	1e+17	1.75	1000000000000000	20	100	19.3531					1.06	3.65	1e+17	1.75	1000000000000000	20	100	4.95006					1.06	3.65	1e+17	1.75	1000000000000000	20	100	18.4655
		1.06	3.65	1e+17	1.75	1000000000000000	60	20	20.4439					1.06	3.65	1e+17	1.75	1000000000000000	60	20	5.32549					1.06	3.65	1e+17	1.75	1000000000000000	60	20	19.5125
		1.06	3.65	1e+17	1.75	1000000000000000	60	60	20.4441					1.06	3.65	1e+17	1.75	1000000000000000	60	60	5.32549					1.06	3.65	1e+17	1.75	1000000000000000	60	60	19.5125
		1.06	3.65	1e+17	1.75	1000000000000000	60	100	20.4441					1.06	3.65	1e+17	1.75	1000000000000000	60	100	5.32549					1.06	3.65	1e+17	1.75	1000000000000000	60	100	19.5126
		1.06	3.65	1e+17	1.75	1000000000000000	100	20	20.7006					1.06	3.65	1e+17	1.75	1000000000000000	100	20	5.41509					1.06	3.65	1e+17	1.75	1000000000000000	100	20	19.7587
		1.06	3.65	1e+17	1.75	1000000000000000	100	60	20.7008					1.06	3.65	1e+17	1.75	1000000000000000	100	60	5.41509					1.06	3.65	1e+17	1.75	1000000000000000	100	60	19.7588
		1.06	3.65	1e+17	1.75	1000000000000000	100	100	20.7008					1.06	3.65	1e+17	1.75	1000000000000000	100	100	5.41509					1.06	3.65	1e+17	1.75	1000000000000000	100	100	19.7588
		1.06	3.65	1e+17	1.75	1e+16	20	20	12.8702					1.06	3.65	1e+17	1.75	1e+16	20	20	2.15383					1.06	3.65	1e+17	1.75	1e+16	20	20	11.9957
		1.06	3.65	1e+17	1.75	1e+16	20	60	12.8701					1.06	3.65	1e+17	1.75	1e+16	20	60	2.15386					1.06	3.65	1e+17	1.75	1e+16	20	60	11.9956
		1.06	3.65	1e+17	1.75	1e+16	20	100	12.8701					1.06	3.65	1e+17	1.75	1e+16	20	100	2.15387					1.06	3.65	1e+17	1.75	1e+16	20	100	11.9956
		1.06	3.65	1e+17	1.75	1e+16	60	20	14.781					1.06	3.65	1e+17	1.75	1e+16	60	20	2.28398					1.06	3.65	1e+17	1.75	1e+16	60	20	13.6891
		1.06	3.65	1e+17	1.75	1e+16	60	60	14.7808					1.06	3.65	1e+17	1.75	1e+16	60	60	2.284					1.06	3.65	1e+17	1.75	1e+16	60	60	13.689
		1.06	3.65	1e+17	1.75	1e+16	60	100	14.7808					1.06	3.65	1e+17	1.75	1e+16	60	100	2.28401					1.06	3.65	1e+17	1.75	1e+16	60	100	13.689
		1.06	3.65	1e+17	1.75	1e+16	100	20	15.4758					1.06	3.65	1e+17	1.75	1e+16	100	20	2.3128					1.06	3.65	1e+17	1.75	1e+16	100	20	14.3014
		1.06	3.65	1e+17	1.75	1e+16	100	60	15.4757					1.06	3.65	1e+17	1.75	1e+16	100	60	2.31281					1.06	3.65	1e+17	1.75	1e+16	100	60	14.3013
		1.06	3.65	1e+17	1.75	1e+16	100	100	15.4757					1.06	3.65	1e+17	1.75	1e+16	100	100	2.31282					1.06	3.65	1e+17	1.75	1e+16	100	100	14.3013
		1.06	3.65	1e+18	0.75	10000000000000	20	20	20.7167					1.06	3.65	1e+18	0.75	10000000000000	20	20	18.2917					1.06	3.65	1e+18	0.75	10000000000000	20	20	20.5606
		1.06	3.65	1e+18	0.75	10000000000000	20	60	20.7167					1.06	3.65	1e+18	0.75	10000000000000	20	60	18.2917					1.06	3.65	1e+18	0.75	10000000000000	20	60	20.5606
		1.06	3.65	1e+18	0.75	10000000000000	20	100	20.7167					1.06	3.65	1e+18	0.75	10000000000000	20	100	18.2917					1.06	3.65	1e+18	0.75	10000000000000	20	100	20.5606
		1.06	3.65	1e+18	0.75	10000000000000	60	20	20.7208					1.06	3.65	1e+18	0.75	10000000000000	60	20	18.3265					1.06	3.65	1e+18	0.75	10000000000000	60	20	20.5648
		1.06	3.65	1e+18	0.75	10000000000000	60	60	20.7208					1.06	3.65	1e+18	0.75	10000000000000	60	60	18.3265					1.06	3.65	1e+18	0.75	10000000000000	60	60	20.5648
		1.06	3.65	1e+18	0.75	10000000000000	60	100	20.7208					1.06	3.65	1e+18	0.75	10000000000000	60	100	18.3265					1.06	3.65	1e+18	0.75	10000000000000	60	100	20.5648
		1.06	3.65	1e+18	0.75	10000000000000	100	20	20.7216					1.06	3.65	1e+18	0.75	10000000000000	100	20	18.3335					1.06	3.65	1e+18	0.75	10000000000000	100	20	20.5656
		1.06	3.65	1e+18	0.75	10000000000000	100	60	20.7216					1.06	3.65	1e+18	0.75	10000000000000	100	60	18.3335					1.06	3.65	1e+18	0.75	10000000000000	100	60	20.5656
		1.06	3.65	1e+18	0.75	10000000000000	100	100	20.7216					1.06	3.65	1e+18	0.75	10000000000000	100	100	18.3335					1.06	3.65	1e+18	0.75	10000000000000	100	100	20.5656
		1.06	3.65	1e+18	0.75	100000000000000	20	20	20.6602					1.06	3.65	1e+18	0.75	100000000000000	20	20	14.9287					1.06	3.65	1e+18	0.75	100000000000000	20	20	20.4982
		1.06	3.65	1e+18	0.75	100000000000000	20	60	20.6602					1.06	3.65	1e+18	0.75	100000000000000	20	60	14.9287					1.06	3.65	1e+18	0.75	100000000000000	20	60	20.4982
		1.06	3.65	1e+18	0.75	100000000000000	20	100	20.6602					1.06	3.65	1e+18	0.75	100000000000000	20	100	14.9287					1.06	3.65	1e+18	0.75	100000000000000	20	100	20.4982
		1.06	3.65	1e+18	0.75	100000000000000	60	20	20.6958					1.06	3.65	1e+18	0.75	100000000000000	60	20	15.0414					1.06	3.65	1e+18	0.75	100000000000000	60	20	20.534
		1.06	3.65	1e+18	0.75	100000000000000	60	60	20.6958					1.06	3.65	1e+18	0.75	100000000000000	60	60	15.0414					1.06	3.65	1e+18	0.75	100000000000000	60	60	20.534
		1.06	3.65	1e+18	0.75	100000000000000	60	100	20.6958					1.06	3.65	1e+18	0.75	100000000000000	60	100	15.0414					1.06	3.65	1e+18	0.75	100000000000000	60	100	20.534
		1.06	3.65	1e+18	0.75	100000000000000	100	20	20.703					1.06	3.65	1e+18	0.75	100000000000000	100	20	15.0643					1.06	3.65	1e+18	0.75	100000000000000	100	20	20.5412
		1.06	3.65	1e+18	0.75	100000000000000	100	60	20.703					1.06	3.65	1e+18	0.75	100000000000000	100	60	15.0643					1.06	3.65	1e+18	0.75	100000000000000	100	60	20.5412
		1.06	3.65	1e+18	0.75	100000000000000	100	100	20.703					1.06	3.65	1e+18	0.75	100000000000000	100	100	15.0643					1.06	3.65	1e+18	0.75	100000000000000	100	100	20.5412
		1.06	3.65	1e+18	0.75	1000000000000000	20	20	20.1241					1.06	3.65	1e+18	0.75	1000000000000000	20	20	10.0149					1.06	3.65	1e+18	0.75	1000000000000000	20	20	19.9104
		1.06	3.65	1e+18	0.75	1000000000000000	20	60	20.1241					1.06	3.65	1e+18	0.75	1000000000000000	20	60	10.0149					1.06	3.65	1e+18	0.75	1000000000000000	20	60	19.9104
		1.06	3.65	1e+18	0.75	1000000000000000	20	100	20.1241					1.06	3.65	1e+18	0.75	1000000000000000	20	100	10.0149					1.06	3.65	1e+18	0.75	1000000000000000	20	100	19.9104
		1.06	3.65	1e+18	0.75	1000000000000000	60	20	20.4526					1.06	3.65	1e+18	0.75	1000000000000000	60	20	10.273					1.06	3.65	1e+18	0.75	1000000000000000	60	20	20.237
		1.06	3.65	1e+18	0.75	1000000000000000	60	60	20.4526					1.06	3.65	1e+18	0.75	1000000000000000	60	60	10.273					1.06	3.65	1e+18	0.75	1000000000000000	60	60	20.237
		1.06	3.65	1e+18	0.75	1000000000000000	60	100	20.4526					1.06	3.65	1e+18	0.75	1000000000000000	60	100	10.273					1.06	3.65	1e+18	0.75	1000000000000000	60	100	20.237
		1.06	3.65	1e+18	0.75	1000000000000000	100	20	20.5206					1.06	3.65	1e+18	0.75	1000000000000000	100	20	10.3271					1.06	3.65	1e+18	0.75	1000000000000000	100	20	20.3047
		1.06	3.65	1e+18	0.75	1000000000000000	100	60	20.5206					1.06	3.65	1e+18	0.75	1000000000000000	100	60	10.3271					1.06	3.65	1e+18	0.75	1000000000000000	100	60	20.3047
		1.06	3.65	1e+18	0.75	1000000000000000	100	100	20.5206					1.06	3.65	1e+18	0.75	1000000000000000	100	100	10.3271					1.06	3.65	1e+18	0.75	1000000000000000	100	100	20.3047
		1.06	3.65	1e+18	0.75	1e+16	20	20	16.5687					1.06	3.65	1e+18	0.75	1e+16	20	20	5.47212					1.06	3.65	1e+18	0.75	1e+16	20	20	16.173
		1.06	3.65	1e+18	0.75	1e+16	20	60	16.5687					1.06	3.65	1e+18	0.75	1e+16	20	60	5.47212					1.06	3.65	1e+18	0.75	1e+16	20	60	16.173
		1.06	3.65	1e+18	0.75	1e+16	20	100	16.5687					1.06	3.65	1e+18	0.75	1e+16	20	100	5.47212					1.06	3.65	1e+18	0.75	1e+16	20	100	16.173
		1.06	3.65	1e+18	0.75	1e+16	60	20	18.5141					1.06	3.65	1e+18	0.75	1e+16	60	20	6.00583					1.06	3.65	1e+18	0.75	1e+16	60	20	18.0101
		1.06	3.65	1e+18	0.75	1e+16	60	60	18.5141					1.06	3.65	1e+18	0.75	1e+16	60	60	6.00583					1.06	3.65	1e+18	0.75	1e+16	60	60	18.0101
		1.06	3.65	1e+18	0.75	1e+16	60	100	18.5141					1.06	3.65	1e+18	0.75	1e+16	60	100	6.00583					1.06	3.65	1e+18	0.75	1e+16	60	100	18.0101
		1.06	3.65	1e+18	0.75	1e+16	100	20	19.0198					1.06	3.65	1e+18	0.75	1e+16	100	20	6.14268					1.06	3.65	1e+18	0.75	1e+16	100	20	18.4864
		1.06	3.65	1e+18	0.75	1e+16	100	60	19.0198					1.06	3.65	1e+18	0.75	1e+16	100	60	6.14268					1.06	3.65	1e+18	0.75	1e+16	100	60	18.4864
		1.06	3.65	1e+18	0.75	1e+16	100	100	19.0198					1.06	3.65	1e+18	0.75	1e+16	100	100	6.14268					1.06	3.65	1e+18	0.75	1e+16	100	100	18.4864
		1.06	3.65	1e+18	1	10000000000000	20	20	21.74					1.06	3.65	1e+18	1	10000000000000	20	20	18.9288					1.06	3.65	1e+18	1	10000000000000	20	20	21.5687
		1.06	3.65	1e+18	1	10000000000000	20	60	21.74					1.06	3.65	1e+18	1	10000000000000	20	60	18.9288					1.06	3.65	1e+18	1	10000000000000	20	60	21.5687
		1.06	3.65	1e+18	1	10000000000000	20	100	21.74					1.06	3.65	1e+18	1	10000000000000	20	100	18.9288					1.06	3.65	1e+18	1	10000000000000	20	100	21.5687
		1.06	3.65	1e+18	1	10000000000000	60	20	21.7464					1.06	3.65	1e+18	1	10000000000000	60	20	18.9741					1.06	3.65	1e+18	1	10000000000000	60	20	21.5752
		1.06	3.65	1e+18	1	10000000000000	60	60	21.7465					1.06	3.65	1e+18	1	10000000000000	60	60	18.9741					1.06	3.65	1e+18	1	10000000000000	60	60	21.5752
		1.06	3.65	1e+18	1	10000000000000	60	100	21.7465					1.06	3.65	1e+18	1	10000000000000	60	100	18.9741					1.06	3.65	1e+18	1	10000000000000	60	100	21.5752
		1.06	3.65	1e+18	1	10000000000000	100	20	21.7477					1.06	3.65	1e+18	1	10000000000000	100	20	18.9832					1.06	3.65	1e+18	1	10000000000000	100	20	21.5765
		1.06	3.65	1e+18	1	10000000000000	100	60	21.7477					1.06	3.65	1e+18	1	10000000000000	100	60	18.9832					1.06	3.65	1e+18	1	10000000000000	100	60	21.5765
		1.06	3.65	1e+18	1	10000000000000	100	100	21.7478					1.06	3.65	1e+18	1	10000000000000	100	100	18.9832					1.06	3.65	1e+18	1	10000000000000	100	100	21.5765
		1.06	3.65	1e+18	1	100000000000000	20	20	21.6501					1.06	3.65	1e+18	1	100000000000000	20	20	14.9894					1.06	3.65	1e+18	1	100000000000000	20	20	21.4705
		1.06	3.65	1e+18	1	100000000000000	20	60	21.6501					1.06	3.65	1e+18	1	100000000000000	20	60	14.9894					1.06	3.65	1e+18	1	100000000000000	20	60	21.4705
		1.06	3.65	1e+18	1	100000000000000	20	100	21.6501					1.06	3.65	1e+18	1	100000000000000	20	100	14.9894					1.06	3.65	1e+18	1	100000000000000	20	100	21.4705
		1.06	3.65	1e+18	1	100000000000000	60	20	21.7076					1.06	3.65	1e+18	1	100000000000000	60	20	15.1235					1.06	3.65	1e+18	1	100000000000000	60	20	21.528
		1.06	3.65	1e+18	1	100000000000000	60	60	21.7076					1.06	3.65	1e+18	1	100000000000000	60	60	15.1235					1.06	3.65	1e+18	1	100000000000000	60	60	21.528
		1.06	3.65	1e+18	1	100000000000000	60	100	21.7076					1.06	3.65	1e+18	1	100000000000000	60	100	15.1235					1.06	3.65	1e+18	1	100000000000000	60	100	21.528
		1.06	3.65	1e+18	1	100000000000000	100	20	21.7191					1.06	3.65	1e+18	1	100000000000000	100	20	15.1508					1.06	3.65	1e+18	1	100000000000000	100	20	21.5396
		1.06	3.65	1e+18	1	100000000000000	100	60	21.7191					1.06	3.65	1e+18	1	100000000000000	100	60	15.1508					1.06	3.65	1e+18	1	100000000000000	100	60	21.5396
		1.06	3.65	1e+18	1	100000000000000	100	100	21.7192					1.06	3.65	1e+18	1	100000000000000	100	100	15.1508					1.06	3.65	1e+18	1	100000000000000	100	100	21.5396
		1.06	3.65	1e+18	1	1000000000000000	20	20	20.8244					1.06	3.65	1e+18	1	1000000000000000	20	20	9.82494					1.06	3.65	1e+18	1	1000000000000000	20	20	20.5772
		1.06	3.65	1e+18	1	1000000000000000	20	60	20.8244					1.06	3.65	1e+18	1	1000000000000000	20	60	9.82494					1.06	3.65	1e+18	1	1000000000000000	20	60	20.5772
		1.06	3.65	1e+18	1	1000000000000000	20	100	20.8244					1.06	3.65	1e+18	1	1000000000000000	20	100	9.82494					1.06	3.65	1e+18	1	1000000000000000	20	100	20.5772
		1.06	3.65	1e+18	1	1000000000000000	60	20	21.3345					1.06	3.65	1e+18	1	1000000000000000	60	20	10.1348					1.06	3.65	1e+18	1	1000000000000000	60	20	21.0811
		1.06	3.65	1e+18	1	1000000000000000	60	60	21.3346					1.06	3.65	1e+18	1	1000000000000000	60	60	10.1348					1.06	3.65	1e+18	1	1000000000000000	60	60	21.0811
		1.06	3.65	1e+18	1	1000000000000000	60	100	21.3346					1.06	3.65	1e+18	1	1000000000000000	60	100	10.1348					1.06	3.65	1e+18	1	1000000000000000	60	100	21.0811
		1.06	3.65	1e+18	1	1000000000000000	100	20	21.4427					1.06	3.65	1e+18	1	1000000000000000	100	20	10.2009					1.06	3.65	1e+18	1	1000000000000000	100	20	21.1879
		1.06	3.65	1e+18	1	1000000000000000	100	60	21.4427					1.06	3.65	1e+18	1	1000000000000000	100	60	10.2009					1.06	3.65	1e+18	1	1000000000000000	100	60	21.1879
		1.06	3.65	1e+18	1	1000000000000000	100	100	21.4427					1.06	3.65	1e+18	1	1000000000000000	100	100	10.2009					1.06	3.65	1e+18	1	1000000000000000	100	100	21.1879
		1.06	3.65	1e+18	1	1e+16	20	20	16.2993					1.06	3.65	1e+18	1	1e+16	20	20	5.23397					1.06	3.65	1e+18	1	1e+16	20	20	15.8877
		1.06	3.65	1e+18	1	1e+16	20	60	16.2993					1.06	3.65	1e+18	1	1e+16	20	60	5.23397					1.06	3.65	1e+18	1	1e+16	20	60	15.8877
		1.06	3.65	1e+18	1	1e+16	20	100	16.2993					1.06	3.65	1e+18	1	1e+16	20	100	5.23397					1.06	3.65	1e+18	1	1e+16	20	100	15.8877
		1.06	3.65	1e+18	1	1e+16	60	20	18.6427					1.06	3.65	1e+18	1	1e+16	60	20	5.76215					1.06	3.65	1e+18	1	1e+16	60	20	18.0712
		1.06	3.65	1e+18	1	1e+16	60	60	18.6427					1.06	3.65	1e+18	1	1e+16	60	60	5.76215					1.06	3.65	1e+18	1	1e+16	60	60	18.0712
		1.06	3.65	1e+18	1	1e+16	60	100	18.6427					1.06	3.65	1e+18	1	1e+16	60	100	5.76215					1.06	3.65	1e+18	1	1e+16	60	100	18.0712
		1.06	3.65	1e+18	1	1e+16	100	20	19.3327					1.06	3.65	1e+18	1	1e+16	100	20	5.91206					1.06	3.65	1e+18	1	1e+16	100	20	18.7106
		1.06	3.65	1e+18	1	1e+16	100	60	19.3327					1.06	3.65	1e+18	1	1e+16	100	60	5.91206					1.06	3.65	1e+18	1	1e+16	100	60	18.7106
		1.06	3.65	1e+18	1	1e+16	100	100	19.3327					1.06	3.65	1e+18	1	1e+16	100	100	5.91206					1.06	3.65	1e+18	1	1e+16	100	100	18.7106
		1.06	3.65	1e+18	1.25	10000000000000	20	20	22.2802					1.06	3.65	1e+18	1.25	10000000000000	20	20	19.1475					1.06	3.65	1e+18	1.25	10000000000000	20	20	22.1018
		1.06	3.65	1e+18	1.25	10000000000000	20	60	22.2803					1.06	3.65	1e+18	1.25	10000000000000	20	60	19.1475					1.06	3.65	1e+18	1.25	10000000000000	20	60	22.1019
		1.06	3.65	1e+18	1.25	10000000000000	20	100	22.2803					1.06	3.65	1e+18	1.25	10000000000000	20	100	19.1475					1.06	3.65	1e+18	1.25	10000000000000	20	100	22.1019
		1.06	3.65	1e+18	1.25	10000000000000	60	20	22.2891					1.06	3.65	1e+18	1.25	10000000000000	60	20	19.2016					1.06	3.65	1e+18	1.25	10000000000000	60	20	22.1108
		1.06	3.65	1e+18	1.25	10000000000000	60	60	22.2892					1.06	3.65	1e+18	1.25	10000000000000	60	60	19.2016					1.06	3.65	1e+18	1.25	10000000000000	60	60	22.1108
		1.06	3.65	1e+18	1.25	10000000000000	60	100	22.2892					1.06	3.65	1e+18	1.25	10000000000000	60	100	19.2016					1.06	3.65	1e+18	1.25	10000000000000	60	100	22.1108
		1.06	3.65	1e+18	1.25	10000000000000	100	20	22.2909					1.06	3.65	1e+18	1.25	10000000000000	100	20	19.2125					1.06	3.65	1e+18	1.25	10000000000000	100	20	22.1125
		1.06	3.65	1e+18	1.25	10000000000000	100	60	22.291					1.06	3.65	1e+18	1.25	10000000000000	100	60	19.2126					1.06	3.65	1e+18	1.25	10000000000000	100	60	22.1126
		1.06	3.65	1e+18	1.25	10000000000000	100	100	22.291					1.06	3.65	1e+18	1.25	10000000000000	100	100	19.2126					1.06	3.65	1e+18	1.25	10000000000000	100	100	22.1126
		1.06	3.65	1e+18	1.25	100000000000000	20	20	22.1551					1.06	3.65	1e+18	1.25	100000000000000	20	20	14.8243					1.06	3.65	1e+18	1.25	100000000000000	20	20	21.9661
		1.06	3.65	1e+18	1.25	100000000000000	20	60	22.1551					1.06	3.65	1e+18	1.25	100000000000000	20	60	14.8243					1.06	3.65	1e+18	1.25	100000000000000	20	60	21.9661
		1.06	3.65	1e+18	1.25	100000000000000	20	100	22.1551					1.06	3.65	1e+18	1.25	100000000000000	20	100	14.8243					1.06	3.65	1e+18	1.25	100000000000000	20	100	21.9661
		1.06	3.65	1e+18	1.25	100000000000000	60	20	22.2357					1.06	3.65	1e+18	1.25	100000000000000	60	20	14.9747					1.06	3.65	1e+18	1.25	100000000000000	60	20	22.0467
		1.06	3.65	1e+18	1.25	100000000000000	60	60	22.2358					1.06	3.65	1e+18	1.25	100000000000000	60	60	14.9747					1.06	3.65	1e+18	1.25	100000000000000	60	60	22.0467
		1.06	3.65	1e+18	1.25	100000000000000	60	100	22.2358					1.06	3.65	1e+18	1.25	100000000000000	60	100	14.9747					1.06	3.65	1e+18	1.25	100000000000000	60	100	22.0467
		1.06	3.65	1e+18	1.25	100000000000000	100	20	22.252					1.06	3.65	1e+18	1.25	100000000000000	100	20	15.0055					1.06	3.65	1e+18	1.25	100000000000000	100	20	22.0629
		1.06	3.65	1e+18	1.25	100000000000000	100	60	22.2521					1.06	3.65	1e+18	1.25	100000000000000	100	60	15.0055					1.06	3.65	1e+18	1.25	100000000000000	100	60	22.063
		1.06	3.65	1e+18	1.25	100000000000000	100	100	22.2521					1.06	3.65	1e+18	1.25	100000000000000	100	100	15.0055					1.06	3.65	1e+18	1.25	100000000000000	100	100	22.063
		1.06	3.65	1e+18	1.25	1000000000000000	20	20	21.0489					1.06	3.65	1e+18	1.25	1000000000000000	20	20	9.55516					1.06	3.65	1e+18	1.25	1000000000000000	20	20	20.78
		1.06	3.65	1e+18	1.25	1000000000000000	20	60	21.0489					1.06	3.65	1e+18	1.25	1000000000000000	20	60	9.55516					1.06	3.65	1e+18	1.25	1000000000000000	20	60	20.7801
		1.06	3.65	1e+18	1.25	1000000000000000	20	100	21.0489					1.06	3.65	1e+18	1.25	1000000000000000	20	100	9.55516					1.06	3.65	1e+18	1.25	1000000000000000	20	100	20.7801
		1.06	3.65	1e+18	1.25	1000000000000000	60	20	21.7315					1.06	3.65	1e+18	1.25	1000000000000000	60	20	9.89812					1.06	3.65	1e+18	1.25	1000000000000000	60	20	21.4506
		1.06	3.65	1e+18	1.25	1000000000000000	60	60	21.7315					1.06	3.65	1e+18	1.25	1000000000000000	60	60	9.89812					1.06	3.65	1e+18	1.25	1000000000000000	60	60	21.4506
		1.06	3.65	1e+18	1.25	1000000000000000	60	100	21.7316					1.06	3.65	1e+18	1.25	1000000000000000	60	100	9.89812					1.06	3.65	1e+18	1.25	1000000000000000	60	100	21.4506
		1.06	3.65	1e+18	1.25	1000000000000000	100	20	21.8804					1.06	3.65	1e+18	1.25	1000000000000000	100	20	9.97303					1.06	3.65	1e+18	1.25	1000000000000000	100	20	21.5969
		1.06	3.65	1e+18	1.25	1000000000000000	100	60	21.8805					1.06	3.65	1e+18	1.25	1000000000000000	100	60	9.97303					1.06	3.65	1e+18	1.25	1000000000000000	100	60	21.5969
		1.06	3.65	1e+18	1.25	1000000000000000	100	100	21.8805					1.06	3.65	1e+18	1.25	1000000000000000	100	100	9.97303					1.06	3.65	1e+18	1.25	1000000000000000	100	100	21.5969
		1.06	3.65	1e+18	1.25	1e+16	20	20	16.0018					1.06	3.65	1e+18	1.25	1e+16	20	20	5.07184					1.06	3.65	1e+18	1.25	1e+16	20	20	15.5899
		1.06	3.65	1e+18	1.25	1e+16	20	60	16.0018					1.06	3.65	1e+18	1.25	1e+16	20	60	5.07184					1.06	3.65	1e+18	1.25	1e+16	20	60	15.5899
		1.06	3.65	1e+18	1.25	1e+16	20	100	16.0018					1.06	3.65	1e+18	1.25	1e+16	20	100	5.07184					1.06	3.65	1e+18	1.25	1e+16	20	100	15.5899
		1.06	3.65	1e+18	1.25	1e+16	60	20	18.4551					1.06	3.65	1e+18	1.25	1e+16	60	20	5.53148					1.06	3.65	1e+18	1.25	1e+16	60	20	17.8509
		1.06	3.65	1e+18	1.25	1e+16	60	60	18.4551					1.06	3.65	1e+18	1.25	1e+16	60	60	5.53148					1.06	3.65	1e+18	1.25	1e+16	60	60	17.8508
		1.06	3.65	1e+18	1.25	1e+16	60	100	18.4551					1.06	3.65	1e+18	1.25	1e+16	60	100	5.53148					1.06	3.65	1e+18	1.25	1e+16	60	100	17.8508
		1.06	3.65	1e+18	1.25	1e+16	100	20	19.2593					1.06	3.65	1e+18	1.25	1e+16	100	20	5.67291					1.06	3.65	1e+18	1.25	1e+16	100	20	18.5861
		1.06	3.65	1e+18	1.25	1e+16	100	60	19.2593					1.06	3.65	1e+18	1.25	1e+16	100	60	5.67291					1.06	3.65	1e+18	1.25	1e+16	100	60	18.5861
		1.06	3.65	1e+18	1.25	1e+16	100	100	19.2593					1.06	3.65	1e+18	1.25	1e+16	100	100	5.67291					1.06	3.65	1e+18	1.25	1e+16	100	100	18.5861
		1.06	3.65	1e+18	1.5	10000000000000	20	20	22.59					1.06	3.65	1e+18	1.5	10000000000000	20	20	19.1781					1.06	3.65	1e+18	1.5	10000000000000	20	20	22.4077
		1.06	3.65	1e+18	1.5	10000000000000	20	60	22.5901					1.06	3.65	1e+18	1.5	10000000000000	20	60	19.1781					1.06	3.65	1e+18	1.5	10000000000000	20	60	22.4077
		1.06	3.65	1e+18	1.5	10000000000000	20	100	22.5901					1.06	3.65	1e+18	1.5	10000000000000	20	100	19.1781					1.06	3.65	1e+18	1.5	10000000000000	20	100	22.4077
		1.06	3.65	1e+18	1.5	10000000000000	60	20	22.6015					1.06	3.65	1e+18	1.5	10000000000000	60	20	19.2397					1.06	3.65	1e+18	1.5	10000000000000	60	20	22.4191
		1.06	3.65	1e+18	1.5	10000000000000	60	60	22.6015					1.06	3.65	1e+18	1.5	10000000000000	60	60	19.2397					1.06	3.65	1e+18	1.5	10000000000000	60	60	22.4192
		1.06	3.65	1e+18	1.5	10000000000000	60	100	22.6016					1.06	3.65	1e+18	1.5	10000000000000	60	100	19.2397					1.06	3.65	1e+18	1.5	10000000000000	60	100	22.4192
		1.06	3.65	1e+18	1.5	10000000000000	100	20	22.6038					1.06	3.65	1e+18	1.5	10000000000000	100	20	19.2522					1.06	3.65	1e+18	1.5	10000000000000	100	20	22.4214
		1.06	3.65	1e+18	1.5	10000000000000	100	60	22.6038					1.06	3.65	1e+18	1.5	10000000000000	100	60	19.2522					1.06	3.65	1e+18	1.5	10000000000000	100	60	22.4215
		1.06	3.65	1e+18	1.5	10000000000000	100	100	22.6038					1.06	3.65	1e+18	1.5	10000000000000	100	100	19.2522					1.06	3.65	1e+18	1.5	10000000000000	100	100	22.4215
		1.06	3.65	1e+18	1.5	100000000000000	20	20	22.4288					1.06	3.65	1e+18	1.5	100000000000000	20	20	14.5904					1.06	3.65	1e+18	1.5	100000000000000	20	20	22.2337
		1.06	3.65	1e+18	1.5	100000000000000	20	60	22.4289					1.06	3.65	1e+18	1.5	100000000000000	20	60	14.5904					1.06	3.65	1e+18	1.5	100000000000000	20	60	22.2337
		1.06	3.65	1e+18	1.5	100000000000000	20	100	22.4289					1.06	3.65	1e+18	1.5	100000000000000	20	100	14.5904					1.06	3.65	1e+18	1.5	100000000000000	20	100	22.2338
		1.06	3.65	1e+18	1.5	100000000000000	60	20	22.5333					1.06	3.65	1e+18	1.5	100000000000000	60	20	14.7535					1.06	3.65	1e+18	1.5	100000000000000	60	20	22.3379
		1.06	3.65	1e+18	1.5	100000000000000	60	60	22.5333					1.06	3.65	1e+18	1.5	100000000000000	60	60	14.7535					1.06	3.65	1e+18	1.5	100000000000000	60	60	22.3379
		1.06	3.65	1e+18	1.5	100000000000000	60	100	22.5333					1.06	3.65	1e+18	1.5	100000000000000	60	100	14.7535					1.06	3.65	1e+18	1.5	100000000000000	60	100	22.3379
		1.06	3.65	1e+18	1.5	100000000000000	100	20	22.5544					1.06	3.65	1e+18	1.5	100000000000000	100	20	14.787					1.06	3.65	1e+18	1.5	100000000000000	100	20	22.359
		1.06	3.65	1e+18	1.5	100000000000000	100	60	22.5545					1.06	3.65	1e+18	1.5	100000000000000	100	60	14.7869					1.06	3.65	1e+18	1.5	100000000000000	100	60	22.359
		1.06	3.65	1e+18	1.5	100000000000000	100	100	22.5545					1.06	3.65	1e+18	1.5	100000000000000	100	100	14.7869					1.06	3.65	1e+18	1.5	100000000000000	100	100	22.359
		1.06	3.65	1e+18	1.5	1000000000000000	20	20	21.0651					1.06	3.65	1e+18	1.5	1000000000000000	20	20	9.29508					1.06	3.65	1e+18	1.5	1000000000000000	20	20	20.7809
		1.06	3.65	1e+18	1.5	1000000000000000	20	60	21.0651					1.06	3.65	1e+18	1.5	1000000000000000	20	60	9.29507					1.06	3.65	1e+18	1.5	1000000000000000	20	60	20.7809
		1.06	3.65	1e+18	1.5	1000000000000000	20	100	21.0651					1.06	3.65	1e+18	1.5	1000000000000000	20	100	9.29507					1.06	3.65	1e+18	1.5	1000000000000000	20	100	20.781
		1.06	3.65	1e+18	1.5	1000000000000000	60	20	21.9007					1.06	3.65	1e+18	1.5	1000000000000000	60	20	9.65476					1.06	3.65	1e+18	1.5	1000000000000000	60	20	21.5976
		1.06	3.65	1e+18	1.5	1000000000000000	60	60	21.9007					1.06	3.65	1e+18	1.5	1000000000000000	60	60	9.65476					1.06	3.65	1e+18	1.5	1000000000000000	60	60	21.5977
		1.06	3.65	1e+18	1.5	1000000000000000	60	100	21.9007					1.06	3.65	1e+18	1.5	1000000000000000	60	100	9.65476					1.06	3.65	1e+18	1.5	1000000000000000	60	100	21.5977
		1.06	3.65	1e+18	1.5	1000000000000000	100	20	22.0889					1.06	3.65	1e+18	1.5	1000000000000000	100	20	9.73543					1.06	3.65	1e+18	1.5	1000000000000000	100	20	21.7816
		1.06	3.65	1e+18	1.5	1000000000000000	100	60	22.089					1.06	3.65	1e+18	1.5	1000000000000000	100	60	9.73543					1.06	3.65	1e+18	1.5	1000000000000000	100	60	21.7817
		1.06	3.65	1e+18	1.5	1000000000000000	100	100	22.089					1.06	3.65	1e+18	1.5	1000000000000000	100	100	9.73543					1.06	3.65	1e+18	1.5	1000000000000000	100	100	21.7817
		1.06	3.65	1e+18	1.5	1e+16	20	20	15.7969					1.06	3.65	1e+18	1.5	1e+16	20	20	4.97605					1.06	3.65	1e+18	1.5	1e+16	20	20	15.3874
		1.06	3.65	1e+18	1.5	1e+16	20	60	15.7969					1.06	3.65	1e+18	1.5	1e+16	20	60	4.97605					1.06	3.65	1e+18	1.5	1e+16	20	60	15.3874
		1.06	3.65	1e+18	1.5	1e+16	20	100	15.7969					1.06	3.65	1e+18	1.5	1e+16	20	100	4.97605					1.06	3.65	1e+18	1.5	1e+16	20	100	15.3874
		1.06	3.65	1e+18	1.5	1e+16	60	20	18.2051					1.06	3.65	1e+18	1.5	1e+16	60	20	5.3488					1.06	3.65	1e+18	1.5	1e+16	60	20	17.5853
		1.06	3.65	1e+18	1.5	1e+16	60	60	18.2051					1.06	3.65	1e+18	1.5	1e+16	60	60	5.3488					1.06	3.65	1e+18	1.5	1e+16	60	60	17.5853
		1.06	3.65	1e+18	1.5	1e+16	60	100	18.2051					1.06	3.65	1e+18	1.5	1e+16	60	100	5.3488					1.06	3.65	1e+18	1.5	1e+16	60	100	17.5853
		1.06	3.65	1e+18	1.5	1e+16	100	20	19.0615					1.06	3.65	1e+18	1.5	1e+16	100	20	5.4683					1.06	3.65	1e+18	1.5	1e+16	100	20	18.3559
		1.06	3.65	1e+18	1.5	1e+16	100	60	19.0614					1.06	3.65	1e+18	1.5	1e+16	100	60	5.4683					1.06	3.65	1e+18	1.5	1e+16	100	60	18.3559
		1.06	3.65	1e+18	1.5	1e+16	100	100	19.0614					1.06	3.65	1e+18	1.5	1e+16	100	100	5.4683					1.06	3.65	1e+18	1.5	1e+16	100	100	18.3559
		1.06	3.65	1e+18	1.75	10000000000000	20	20	22.7801					1.06	3.65	1e+18	1.75	10000000000000	20	20	19.1194					1.06	3.65	1e+18	1.75	10000000000000	20	20	22.5953
		1.06	3.65	1e+18	1.75	10000000000000	20	60	22.7802					1.06	3.65	1e+18	1.75	10000000000000	20	60	19.1194					1.06	3.65	1e+18	1.75	10000000000000	20	60	22.5953
		1.06	3.65	1e+18	1.75	10000000000000	20	100	22.7802					1.06	3.65	1e+18	1.75	10000000000000	20	100	19.1194					1.06	3.65	1e+18	1.75	10000000000000	20	100	22.5953
		1.06	3.65	1e+18	1.75	10000000000000	60	20	22.7942					1.06	3.65	1e+18	1.75	10000000000000	60	20	19.1875					1.06	3.65	1e+18	1.75	10000000000000	60	20	22.6093
		1.06	3.65	1e+18	1.75	10000000000000	60	60	22.7942					1.06	3.65	1e+18	1.75	10000000000000	60	60	19.1875					1.06	3.65	1e+18	1.75	10000000000000	60	60	22.6093
		1.06	3.65	1e+18	1.75	10000000000000	60	100	22.7942					1.06	3.65	1e+18	1.75	10000000000000	60	100	19.1876					1.06	3.65	1e+18	1.75	10000000000000	60	100	22.6093
		1.06	3.65	1e+18	1.75	10000000000000	100	20	22.797					1.06	3.65	1e+18	1.75	10000000000000	100	20	19.2013					1.06	3.65	1e+18	1.75	10000000000000	100	20	22.6121
		1.06	3.65	1e+18	1.75	10000000000000	100	60	22.797					1.06	3.65	1e+18	1.75	10000000000000	100	60	19.2013					1.06	3.65	1e+18	1.75	10000000000000	100	60	22.6121
		1.06	3.65	1e+18	1.75	10000000000000	100	100	22.797					1.06	3.65	1e+18	1.75	10000000000000	100	100	19.2013					1.06	3.65	1e+18	1.75	10000000000000	100	100	22.6122
		1.06	3.65	1e+18	1.75	100000000000000	20	20	22.5827					1.06	3.65	1e+18	1.75	100000000000000	20	20	14.3381					1.06	3.65	1e+18	1.75	100000000000000	20	20	22.383
		1.06	3.65	1e+18	1.75	100000000000000	20	60	22.5827					1.06	3.65	1e+18	1.75	100000000000000	20	60	14.338					1.06	3.65	1e+18	1.75	100000000000000	20	60	22.383
		1.06	3.65	1e+18	1.75	100000000000000	20	100	22.5828					1.06	3.65	1e+18	1.75	100000000000000	20	100	14.338					1.06	3.65	1e+18	1.75	100000000000000	20	100	22.3831
		1.06	3.65	1e+18	1.75	100000000000000	60	20	22.7109					1.06	3.65	1e+18	1.75	100000000000000	60	20	14.5109					1.06	3.65	1e+18	1.75	100000000000000	60	20	22.5108
		1.06	3.65	1e+18	1.75	100000000000000	60	60	22.711					1.06	3.65	1e+18	1.75	100000000000000	60	60	14.5109					1.06	3.65	1e+18	1.75	100000000000000	60	60	22.5108
		1.06	3.65	1e+18	1.75	100000000000000	60	100	22.711					1.06	3.65	1e+18	1.75	100000000000000	60	100	14.5109					1.06	3.65	1e+18	1.75	100000000000000	60	100	22.5108
		1.06	3.65	1e+18	1.75	100000000000000	100	20	22.7371					1.06	3.65	1e+18	1.75	100000000000000	100	20	14.5465					1.06	3.65	1e+18	1.75	100000000000000	100	20	22.5368
		1.06	3.65	1e+18	1.75	100000000000000	100	60	22.7371					1.06	3.65	1e+18	1.75	100000000000000	100	60	14.5465					1.06	3.65	1e+18	1.75	100000000000000	100	60	22.5368
		1.06	3.65	1e+18	1.75	100000000000000	100	100	22.7371					1.06	3.65	1e+18	1.75	100000000000000	100	100	14.5465					1.06	3.65	1e+18	1.75	100000000000000	100	100	22.5369
		1.06	3.65	1e+18	1.75	1000000000000000	20	20	20.9906					1.06	3.65	1e+18	1.75	1000000000000000	20	20	9.05692					1.06	3.65	1e+18	1.75	1000000000000000	20	20	20.6951
		1.06	3.65	1e+18	1.75	1000000000000000	20	60	20.9906					1.06	3.65	1e+18	1.75	1000000000000000	20	60	9.05691					1.06	3.65	1e+18	1.75	1000000000000000	20	60	20.6951
		1.06	3.65	1e+18	1.75	1000000000000000	20	100	20.9906					1.06	3.65	1e+18	1.75	1000000000000000	20	100	9.05691					1.06	3.65	1e+18	1.75	1000000000000000	20	100	20.6951
		1.06	3.65	1e+18	1.75	1000000000000000	60	20	21.9552					1.06	3.65	1e+18	1.75	1000000000000000	60	20	9.41727					1.06	3.65	1e+18	1.75	1000000000000000	60	20	21.6334
		1.06	3.65	1e+18	1.75	1000000000000000	60	60	21.9552					1.06	3.65	1e+18	1.75	1000000000000000	60	60	9.41727					1.06	3.65	1e+18	1.75	1000000000000000	60	60	21.6335
		1.06	3.65	1e+18	1.75	1000000000000000	60	100	21.9552					1.06	3.65	1e+18	1.75	1000000000000000	60	100	9.41727					1.06	3.65	1e+18	1.75	1000000000000000	60	100	21.6335
		1.06	3.65	1e+18	1.75	1000000000000000	100	20	22.1802					1.06	3.65	1e+18	1.75	1000000000000000	100	20	9.50045					1.06	3.65	1e+18	1.75	1000000000000000	100	20	21.8522
		1.06	3.65	1e+18	1.75	1000000000000000	100	60	22.1802					1.06	3.65	1e+18	1.75	1000000000000000	100	60	9.50044					1.06	3.65	1e+18	1.75	1000000000000000	100	60	21.8523
		1.06	3.65	1e+18	1.75	1000000000000000	100	100	22.1803					1.06	3.65	1e+18	1.75	1000000000000000	100	100	9.50044					1.06	3.65	1e+18	1.75	1000000000000000	100	100	21.8523
		1.06	3.65	1e+18	1.75	1e+16	20	20	15.6753					1.06	3.65	1e+18	1.75	1e+16	20	20	4.92305					1.06	3.65	1e+18	1.75	1e+16	20	20	15.2679
		1.06	3.65	1e+18	1.75	1e+16	20	60	15.6753					1.06	3.65	1e+18	1.75	1e+16	20	60	4.92305					1.06	3.65	1e+18	1.75	1e+16	20	60	15.2679
		1.06	3.65	1e+18	1.75	1e+16	20	100	15.6753					1.06	3.65	1e+18	1.75	1e+16	20	100	4.92305					1.06	3.65	1e+18	1.75	1e+16	20	100	15.2679
		1.06	3.65	1e+18	1.75	1e+16	60	20	17.9792					1.06	3.65	1e+18	1.75	1e+16	60	20	5.21375					1.06	3.65	1e+18	1.75	1e+16	60	20	17.3498
		1.06	3.65	1e+18	1.75	1e+16	60	60	17.9792					1.06	3.65	1e+18	1.75	1e+16	60	60	5.21375					1.06	3.65	1e+18	1.75	1e+16	60	60	17.3498
		1.06	3.65	1e+18	1.75	1e+16	60	100	17.9792					1.06	3.65	1e+18	1.75	1e+16	60	100	5.21375					1.06	3.65	1e+18	1.75	1e+16	60	100	17.3498
		1.06	3.65	1e+18	1.75	1e+16	100	20	18.8432					1.06	3.65	1e+18	1.75	1e+16	100	20	5.30458					1.06	3.65	1e+18	1.75	1e+16	100	20	18.1201
		1.06	3.65	1e+18	1.75	1e+16	100	60	18.8432					1.06	3.65	1e+18	1.75	1e+16	100	60	5.30458					1.06	3.65	1e+18	1.75	1e+16	100	60	18.1201
		1.06	3.65	1e+18	1.75	1e+16	100	100	18.8432					1.06	3.65	1e+18	1.75	1e+16	100	100	5.30458					1.06	3.65	1e+18	1.75	1e+16	100	100	18.1201
		1.06	3.75	1000000000000000	0.75	10000000000000	20	20	21.8144					1.06	3.76	1000000000000000	0.75	10000000000000	20	20	15.0029					1.06	3.75	1000000000000000	0.75	10000000000000	20	20	21.0233
		1.06	3.75	1000000000000000	0.75	10000000000000	20	60	21.8199					1.06	3.76	1000000000000000	0.75	10000000000000	20	60	15.0026					1.06	3.75	1000000000000000	0.75	10000000000000	20	60	21.0296
		1.06	3.75	1000000000000000	0.75	10000000000000	20	100	21.821					1.06	3.76	1000000000000000	0.75	10000000000000	20	100	15.0025					1.06	3.75	1000000000000000	0.75	10000000000000	20	100	21.0309
		1.06	3.75	1000000000000000	0.75	10000000000000	60	20	21.8473					1.06	3.76	1000000000000000	0.75	10000000000000	60	20	15.1308					1.06	3.75	1000000000000000	0.75	10000000000000	60	20	21.0655
		1.06	3.75	1000000000000000	0.75	10000000000000	60	60	21.8531					1.06	3.76	1000000000000000	0.75	10000000000000	60	60	15.1304					1.06	3.75	1000000000000000	0.75	10000000000000	60	60	21.0723
		1.06	3.75	1000000000000000	0.75	10000000000000	60	100	21.8543					1.06	3.76	1000000000000000	0.75	10000000000000	60	100	15.1304					1.06	3.75	1000000000000000	0.75	10000000000000	60	100	21.0737
		1.06	3.75	1000000000000000	0.75	10000000000000	100	20	21.8542					1.06	3.76	1000000000000000	0.75	10000000000000	100	20	15.157					1.06	3.75	1000000000000000	0.75	10000000000000	100	20	21.0746
		1.06	3.75	1000000000000000	0.75	10000000000000	100	60	21.8601					1.06	3.76	1000000000000000	0.75	10000000000000	100	60	15.1567					1.06	3.75	1000000000000000	0.75	10000000000000	100	60	21.0815
		1.06	3.75	1000000000000000	0.75	10000000000000	100	100	21.8612					1.06	3.76	1000000000000000	0.75	10000000000000	100	100	15.1566					1.06	3.75	1000000000000000	0.75	10000000000000	100	100	21.0828
		1.06	3.75	1000000000000000	0.75	100000000000000	20	20	19.7163					1.06	3.76	1000000000000000	0.75	100000000000000	20	20	8.01612					1.06	3.75	1000000000000000	0.75	100000000000000	20	20	19.0911
		1.06	3.75	1000000000000000	0.75	100000000000000	20	60	19.72					1.06	3.76	1000000000000000	0.75	100000000000000	20	60	8.01587					1.06	3.75	1000000000000000	0.75	100000000000000	20	60	19.0945
		1.06	3.75	1000000000000000	0.75	100000000000000	20	100	19.7207					1.06	3.76	1000000000000000	0.75	100000000000000	20	100	8.01582					1.06	3.75	1000000000000000	0.75	100000000000000	20	100	19.0952
		1.06	3.75	1000000000000000	0.75	100000000000000	60	20	20.0311					1.06	3.76	1000000000000000	0.75	100000000000000	60	20	8.36195					1.06	3.75	1000000000000000	0.75	100000000000000	60	20	19.4545
		1.06	3.75	1000000000000000	0.75	100000000000000	60	60	20.0357					1.06	3.76	1000000000000000	0.75	100000000000000	60	60	8.36197					1.06	3.75	1000000000000000	0.75	100000000000000	60	60	19.4589
		1.06	3.75	1000000000000000	0.75	100000000000000	60	100	20.0367					1.06	3.76	1000000000000000	0.75	100000000000000	60	100	8.36198					1.06	3.75	1000000000000000	0.75	100000000000000	60	100	19.4598
		1.06	3.75	1000000000000000	0.75	100000000000000	100	20	20.1001					1.06	3.76	1000000000000000	0.75	100000000000000	100	20	8.44048					1.06	3.75	1000000000000000	0.75	100000000000000	100	20	19.5354
		1.06	3.75	1000000000000000	0.75	100000000000000	100	60	20.105					1.06	3.76	1000000000000000	0.75	100000000000000	100	60	8.44057					1.06	3.75	1000000000000000	0.75	100000000000000	100	60	19.5401
		1.06	3.75	1000000000000000	0.75	100000000000000	100	100	20.106					1.06	3.76	1000000000000000	0.75	100000000000000	100	100	8.44059					1.06	3.75	1000000000000000	0.75	100000000000000	100	100	19.5411
		1.06	3.75	1000000000000000	0.75	1000000000000000	20	20	14.3499					1.06	3.76	1000000000000000	0.75	1000000000000000	20	20	2.64062					1.06	3.75	1000000000000000	0.75	1000000000000000	20	20	13.4504
		1.06	3.75	1000000000000000	0.75	1000000000000000	20	60	14.3461					1.06	3.76	1000000000000000	0.75	1000000000000000	20	60	2.63964					1.06	3.75	1000000000000000	0.75	1000000000000000	20	60	13.4468
		1.06	3.75	1000000000000000	0.75	1000000000000000	20	100	14.3454					1.06	3.76	1000000000000000	0.75	1000000000000000	20	100	2.63944					1.06	3.75	1000000000000000	0.75	1000000000000000	20	100	13.4461
		1.06	3.75	1000000000000000	0.75	1000000000000000	60	20	15.8948					1.06	3.76	1000000000000000	0.75	1000000000000000	60	20	3.26166					1.06	3.75	1000000000000000	0.75	1000000000000000	60	20	14.9933
		1.06	3.75	1000000000000000	0.75	1000000000000000	60	60	15.894					1.06	3.76	1000000000000000	0.75	1000000000000000	60	60	3.2611					1.06	3.75	1000000000000000	0.75	1000000000000000	60	60	14.9922
		1.06	3.75	1000000000000000	0.75	1000000000000000	60	100	15.8939					1.06	3.76	1000000000000000	0.75	1000000000000000	60	100	3.26098					1.06	3.75	1000000000000000	0.75	1000000000000000	60	100	14.9919
		1.06	3.75	1000000000000000	0.75	1000000000000000	100	20	16.2834					1.06	3.76	1000000000000000	0.75	1000000000000000	100	20	3.44182					1.06	3.75	1000000000000000	0.75	1000000000000000	100	20	15.3908
		1.06	3.75	1000000000000000	0.75	1000000000000000	100	60	16.2837					1.06	3.76	1000000000000000	0.75	1000000000000000	100	60	3.44149					1.06	3.75	1000000000000000	0.75	1000000000000000	100	60	15.3906
		1.06	3.75	1000000000000000	0.75	1000000000000000	100	100	16.2837					1.06	3.76	1000000000000000	0.75	1000000000000000	100	100	3.44143					1.06	3.75	1000000000000000	0.75	1000000000000000	100	100	15.3905
		1.06	3.75	1000000000000000	0.75	1e+16	20	20	6.84364					1.06	3.76	1000000000000000	0.75	1e+16	20	20	1.49165					1.06	3.75	1000000000000000	0.75	1e+16	20	20	6.60393
		1.06	3.75	1000000000000000	0.75	1e+16	20	60	6.83899					1.06	3.76	1000000000000000	0.75	1e+16	20	60	1.492					1.06	3.75	1000000000000000	0.75	1e+16	20	60	6.599
		1.06	3.75	1000000000000000	0.75	1e+16	20	100	6.83777					1.06	3.76	1000000000000000	0.75	1e+16	20	100	1.49207					1.06	3.75	1000000000000000	0.75	1e+16	20	100	6.59802
		1.06	3.75	1000000000000000	0.75	1e+16	60	20	9.32529					1.06	3.76	1000000000000000	0.75	1e+16	60	20	1.49031					1.06	3.75	1000000000000000	0.75	1e+16	60	20	8.8604
		1.06	3.75	1000000000000000	0.75	1e+16	60	60	9.31856					1.06	3.76	1000000000000000	0.75	1e+16	60	60	1.49067					1.06	3.75	1000000000000000	0.75	1e+16	60	60	8.85523
		1.06	3.75	1000000000000000	0.75	1e+16	60	100	9.31721					1.06	3.76	1000000000000000	0.75	1e+16	60	100	1.49074					1.06	3.75	1000000000000000	0.75	1e+16	60	100	8.85419
		1.06	3.75	1000000000000000	0.75	1e+16	100	20	10.2268					1.06	3.76	1000000000000000	0.75	1e+16	100	20	1.49002					1.06	3.75	1000000000000000	0.75	1e+16	100	20	9.67847
		1.06	3.75	1000000000000000	0.75	1e+16	100	60	10.2207					1.06	3.76	1000000000000000	0.75	1e+16	100	60	1.49038					1.06	3.75	1000000000000000	0.75	1e+16	100	60	9.67395
		1.06	3.75	1000000000000000	0.75	1e+16	100	100	10.2195					1.06	3.76	1000000000000000	0.75	1e+16	100	100	1.49045					1.06	3.75	1000000000000000	0.75	1e+16	100	100	9.67304
		1.06	3.75	1000000000000000	1	10000000000000	20	20	22.7551					1.06	3.76	1000000000000000	1	10000000000000	20	20	14.8924					1.06	3.75	1000000000000000	1	10000000000000	20	20	21.9418
		1.06	3.75	1000000000000000	1	10000000000000	20	60	22.7639					1.06	3.76	1000000000000000	1	10000000000000	20	60	14.8918					1.06	3.75	1000000000000000	1	10000000000000	20	60	21.9519
		1.06	3.75	1000000000000000	1	10000000000000	20	100	22.7657					1.06	3.76	1000000000000000	1	10000000000000	20	100	14.8917					1.06	3.75	1000000000000000	1	10000000000000	20	100	21.9539
		1.06	3.75	1000000000000000	1	10000000000000	60	20	22.8015					1.06	3.76	1000000000000000	1	10000000000000	60	20	15.0384					1.06	3.75	1000000000000000	1	10000000000000	60	20	22.0011
		1.06	3.75	1000000000000000	1	10000000000000	60	60	22.8109					1.06	3.76	1000000000000000	1	10000000000000	60	60	15.0379					1.06	3.75	1000000000000000	1	10000000000000	60	60	22.0121
		1.06	3.75	1000000000000000	1	10000000000000	60	100	22.8128					1.06	3.76	1000000000000000	1	10000000000000	60	100	15.0378					1.06	3.75	1000000000000000	1	10000000000000	60	100	22.0143
		1.06	3.75	1000000000000000	1	10000000000000	100	20	22.8112					1.06	3.76	1000000000000000	1	10000000000000	100	20	15.0685					1.06	3.75	1000000000000000	1	10000000000000	100	20	22.0139
		1.06	3.75	1000000000000000	1	10000000000000	100	60	22.8207					1.06	3.76	1000000000000000	1	10000000000000	100	60	15.068					1.06	3.75	1000000000000000	1	10000000000000	100	60	22.025
		1.06	3.75	1000000000000000	1	10000000000000	100	100	22.8226					1.06	3.76	1000000000000000	1	10000000000000	100	100	15.0679					1.06	3.75	1000000000000000	1	10000000000000	100	100	22.0273
		1.06	3.75	1000000000000000	1	100000000000000	20	20	20.0346					1.06	3.76	1000000000000000	1	100000000000000	20	20	7.45179					1.06	3.75	1000000000000000	1	100000000000000	20	20	19.3401
		1.06	3.75	1000000000000000	1	100000000000000	20	60	20.0394					1.06	3.76	1000000000000000	1	100000000000000	20	60	7.45118					1.06	3.75	1000000000000000	1	100000000000000	20	60	19.3442
		1.06	3.75	1000000000000000	1	100000000000000	20	100	20.0404					1.06	3.76	1000000000000000	1	100000000000000	20	100	7.45106					1.06	3.75	1000000000000000	1	100000000000000	20	100	19.345
		1.06	3.75	1000000000000000	1	100000000000000	60	20	20.4759					1.06	3.76	1000000000000000	1	100000000000000	60	20	7.86276					1.06	3.75	1000000000000000	1	100000000000000	60	20	19.8401
		1.06	3.75	1000000000000000	1	100000000000000	60	60	20.483					1.06	3.76	1000000000000000	1	100000000000000	60	60	7.86269					1.06	3.75	1000000000000000	1	100000000000000	60	60	19.8464
		1.06	3.75	1000000000000000	1	100000000000000	60	100	20.4843					1.06	3.76	1000000000000000	1	100000000000000	60	100	7.86268					1.06	3.75	1000000000000000	1	100000000000000	60	100	19.8476
		1.06	3.75	1000000000000000	1	100000000000000	100	20	20.5746					1.06	3.76	1000000000000000	1	100000000000000	100	20	7.95531					1.06	3.75	1000000000000000	1	100000000000000	100	20	19.9535
		1.06	3.75	1000000000000000	1	100000000000000	100	60	20.5821					1.06	3.76	1000000000000000	1	100000000000000	100	60	7.9554					1.06	3.75	1000000000000000	1	100000000000000	100	60	19.9604
		1.06	3.75	1000000000000000	1	100000000000000	100	100	20.5837					1.06	3.76	1000000000000000	1	100000000000000	100	100	7.95542					1.06	3.75	1000000000000000	1	100000000000000	100	100	19.9617
		1.06	3.75	1000000000000000	1	1000000000000000	20	20	13.7144					1.06	3.76	1000000000000000	1	1000000000000000	20	20	2.19984					1.06	3.75	1000000000000000	1	1000000000000000	20	20	12.8149
		1.06	3.75	1000000000000000	1	1000000000000000	20	60	13.7056					1.06	3.76	1000000000000000	1	1000000000000000	20	60	2.19826					1.06	3.75	1000000000000000	1	1000000000000000	20	60	12.8071
		1.06	3.75	1000000000000000	1	1000000000000000	20	100	13.7038					1.06	3.76	1000000000000000	1	1000000000000000	20	100	2.19794					1.06	3.75	1000000000000000	1	1000000000000000	20	100	12.8055
		1.06	3.75	1000000000000000	1	1000000000000000	60	20	15.6169					1.06	3.76	1000000000000000	1	1000000000000000	60	20	2.80522					1.06	3.75	1000000000000000	1	1000000000000000	60	20	14.6543
		1.06	3.75	1000000000000000	1	1000000000000000	60	60	15.6131					1.06	3.76	1000000000000000	1	1000000000000000	60	60	2.80413					1.06	3.75	1000000000000000	1	1000000000000000	60	60	14.6506
		1.06	3.75	1000000000000000	1	1000000000000000	60	100	15.6124					1.06	3.76	1000000000000000	1	1000000000000000	60	100	2.80391					1.06	3.75	1000000000000000	1	1000000000000000	60	100	14.6498
		1.06	3.75	1000000000000000	1	1000000000000000	100	20	16.1222					1.06	3.76	1000000000000000	1	1000000000000000	100	20	2.99312					1.06	3.75	1000000000000000	1	1000000000000000	100	20	15.1522
		1.06	3.75	1000000000000000	1	1000000000000000	100	60	16.1205					1.06	3.76	1000000000000000	1	1000000000000000	100	60	2.99239					1.06	3.75	1000000000000000	1	1000000000000000	100	60	15.1502
		1.06	3.75	1000000000000000	1	1000000000000000	100	100	16.1201					1.06	3.76	1000000000000000	1	1000000000000000	100	100	2.99224					1.06	3.75	1000000000000000	1	1000000000000000	100	100	15.1498
		1.06	3.75	1000000000000000	1	1e+16	20	20	6.10756					1.06	3.76	1000000000000000	1	1e+16	20	20	1.4898					1.06	3.75	1000000000000000	1	1e+16	20	20	5.94619
		1.06	3.75	1000000000000000	1	1e+16	20	60	6.09933					1.06	3.76	1000000000000000	1	1e+16	20	60	1.49041					1.06	3.75	1000000000000000	1	1e+16	20	60	5.93954
		1.06	3.75	1000000000000000	1	1e+16	20	100	6.09768					1.06	3.76	1000000000000000	1	1e+16	20	100	1.49053					1.06	3.75	1000000000000000	1	1e+16	20	100	5.93821
		1.06	3.75	1000000000000000	1	1e+16	60	20	8.44457					1.06	3.76	1000000000000000	1	1e+16	60	20	1.48813					1.06	3.75	1000000000000000	1	1e+16	60	20	8.09728
		1.06	3.75	1000000000000000	1	1e+16	60	60	8.43308					1.06	3.76	1000000000000000	1	1e+16	60	60	1.48877					1.06	3.75	1000000000000000	1	1e+16	60	60	8.08835
		1.06	3.75	1000000000000000	1	1e+16	60	100	8.43078					1.06	3.76	1000000000000000	1	1e+16	60	100	1.48889					1.06	3.75	1000000000000000	1	1e+16	60	100	8.08656
		1.06	3.75	1000000000000000	1	1e+16	100	20	9.39205					1.06	3.76	1000000000000000	1	1e+16	100	20	1.48776					1.06	3.75	1000000000000000	1	1e+16	100	20	8.96308
		1.06	3.75	1000000000000000	1	1e+16	100	60	9.38072					1.06	3.76	1000000000000000	1	1e+16	100	60	1.4884					1.06	3.75	1000000000000000	1	1e+16	100	60	8.95458
		1.06	3.75	1000000000000000	1	1e+16	100	100	9.37844					1.06	3.76	1000000000000000	1	1e+16	100	100	1.48853					1.06	3.75	1000000000000000	1	1e+16	100	100	8.95287
		1.06	3.75	1000000000000000	1.25	10000000000000	20	20	23.1784					1.06	3.76	1000000000000000	1.25	10000000000000	20	20	14.5327					1.06	3.75	1000000000000000	1.25	10000000000000	20	20	22.3662
		1.06	3.75	1000000000000000	1.25	10000000000000	20	60	23.1907					1.06	3.76	1000000000000000	1.25	10000000000000	20	60	14.5319					1.06	3.75	1000000000000000	1.25	10000000000000	20	60	22.3801
		1.06	3.75	1000000000000000	1.25	10000000000000	20	100	23.1931					1.06	3.76	1000000000000000	1.25	10000000000000	20	100	14.5318					1.06	3.75	1000000000000000	1.25	10000000000000	20	100	22.3829
		1.06	3.75	1000000000000000	1.25	10000000000000	60	20	23.2382					1.06	3.76	1000000000000000	1.25	10000000000000	60	20	14.6937					1.06	3.75	1000000000000000	1.25	10000000000000	60	20	22.4422
		1.06	3.75	1000000000000000	1.25	10000000000000	60	60	23.2514					1.06	3.76	1000000000000000	1.25	10000000000000	60	60	14.693					1.06	3.75	1000000000000000	1.25	10000000000000	60	60	22.4574
		1.06	3.75	1000000000000000	1.25	10000000000000	60	100	23.254					1.06	3.76	1000000000000000	1.25	10000000000000	60	100	14.6929					1.06	3.75	1000000000000000	1.25	10000000000000	60	100	22.4604
		1.06	3.75	1000000000000000	1.25	10000000000000	100	20	23.2508					1.06	3.76	1000000000000000	1.25	10000000000000	100	20	14.7269					1.06	3.75	1000000000000000	1.25	10000000000000	100	20	22.4586
		1.06	3.75	1000000000000000	1.25	10000000000000	100	60	23.2641					1.06	3.76	1000000000000000	1.25	10000000000000	100	60	14.7263					1.06	3.75	1000000000000000	1.25	10000000000000	100	60	22.4741
		1.06	3.75	1000000000000000	1.25	10000000000000	100	100	23.2668					1.06	3.76	1000000000000000	1.25	10000000000000	100	100	14.7262					1.06	3.75	1000000000000000	1.25	10000000000000	100	100	22.4772
		1.06	3.75	1000000000000000	1.25	100000000000000	20	20	19.9642					1.06	3.76	1000000000000000	1.25	100000000000000	20	20	6.90226					1.06	3.75	1000000000000000	1.25	100000000000000	20	20	19.2145
		1.06	3.75	1000000000000000	1.25	100000000000000	20	60	19.9693					1.06	3.76	1000000000000000	1.25	100000000000000	20	60	6.90111					1.06	3.75	1000000000000000	1.25	100000000000000	20	60	19.2184
		1.06	3.75	1000000000000000	1.25	100000000000000	20	100	19.9703					1.06	3.76	1000000000000000	1.25	100000000000000	20	100	6.90087					1.06	3.75	1000000000000000	1.25	100000000000000	20	100	19.2192
		1.06	3.75	1000000000000000	1.25	100000000000000	60	20	20.5249					1.06	3.76	1000000000000000	1.25	100000000000000	60	20	7.36315					1.06	3.75	1000000000000000	1.25	100000000000000	60	20	19.8364
		1.06	3.75	1000000000000000	1.25	100000000000000	60	60	20.5337					1.06	3.76	1000000000000000	1.25	100000000000000	60	60	7.36287					1.06	3.75	1000000000000000	1.25	100000000000000	60	60	19.8438
		1.06	3.75	1000000000000000	1.25	100000000000000	60	100	20.5355					1.06	3.76	1000000000000000	1.25	100000000000000	60	100	7.36282					1.06	3.75	1000000000000000	1.25	100000000000000	60	100	19.8454
		1.06	3.75	1000000000000000	1.25	100000000000000	100	20	20.6523					1.06	3.76	1000000000000000	1.25	100000000000000	100	20	7.46931					1.06	3.75	1000000000000000	1.25	100000000000000	100	20	19.9796
		1.06	3.75	1000000000000000	1.25	100000000000000	100	60	20.6621					1.06	3.76	1000000000000000	1.25	100000000000000	100	60	7.4693					1.06	3.75	1000000000000000	1.25	100000000000000	100	60	19.988
		1.06	3.75	1000000000000000	1.25	100000000000000	100	100	20.664					1.06	3.76	1000000000000000	1.25	100000000000000	100	100	7.46929					1.06	3.75	1000000000000000	1.25	100000000000000	100	100	19.9896
		1.06	3.75	1000000000000000	1.25	1000000000000000	20	20	13.0421					1.06	3.76	1000000000000000	1.25	1000000000000000	20	20	1.89969					1.06	3.75	1000000000000000	1.25	1000000000000000	20	20	12.182
		1.06	3.75	1000000000000000	1.25	1000000000000000	20	60	13.0271					1.06	3.76	1000000000000000	1.25	1000000000000000	20	60	1.8976					1.06	3.75	1000000000000000	1.25	1000000000000000	20	60	12.1694
		1.06	3.75	1000000000000000	1.25	1000000000000000	20	100	13.0241					1.06	3.76	1000000000000000	1.25	1000000000000000	20	100	1.89718					1.06	3.75	1000000000000000	1.25	1000000000000000	20	100	12.1668
		1.06	3.75	1000000000000000	1.25	1000000000000000	60	20	15.1794					1.06	3.76	1000000000000000	1.25	1000000000000000	60	20	2.46306					1.06	3.75	1000000000000000	1.25	1000000000000000	60	20	14.2068
		1.06	3.75	1000000000000000	1.25	1000000000000000	60	60	15.1714					1.06	3.76	1000000000000000	1.25	1000000000000000	60	60	2.4614					1.06	3.75	1000000000000000	1.25	1000000000000000	60	60	14.1997
		1.06	3.75	1000000000000000	1.25	1000000000000000	60	100	15.1697					1.06	3.76	1000000000000000	1.25	1000000000000000	60	100	2.46107					1.06	3.75	1000000000000000	1.25	1000000000000000	60	100	14.1982
		1.06	3.75	1000000000000000	1.25	1000000000000000	100	20	15.7692					1.06	3.76	1000000000000000	1.25	1000000000000000	100	20	2.64885					1.06	3.75	1000000000000000	1.25	1000000000000000	100	20	14.778
		1.06	3.75	1000000000000000	1.25	1000000000000000	100	60	15.7642					1.06	3.76	1000000000000000	1.25	1000000000000000	100	60	2.64765					1.06	3.75	1000000000000000	1.25	1000000000000000	100	60	14.7734
		1.06	3.75	1000000000000000	1.25	1000000000000000	100	100	15.7632					1.06	3.76	1000000000000000	1.25	1000000000000000	100	100	2.6474					1.06	3.75	1000000000000000	1.25	1000000000000000	100	100	14.7724
		1.06	3.75	1000000000000000	1.25	1e+16	20	20	5.70567					1.06	3.76	1000000000000000	1.25	1e+16	20	20	1.48878					1.06	3.75	1000000000000000	1.25	1e+16	20	20	5.58134
		1.06	3.75	1000000000000000	1.25	1e+16	20	60	5.69671					1.06	3.76	1000000000000000	1.25	1e+16	20	60	1.48965					1.06	3.75	1000000000000000	1.25	1e+16	20	60	5.57429
		1.06	3.75	1000000000000000	1.25	1e+16	20	100	5.69492					1.06	3.76	1000000000000000	1.25	1e+16	20	100	1.48983					1.06	3.75	1000000000000000	1.25	1e+16	20	100	5.57287
		1.06	3.75	1000000000000000	1.25	1e+16	60	20	7.80422					1.06	3.76	1000000000000000	1.25	1e+16	60	20	1.48681					1.06	3.75	1000000000000000	1.25	1e+16	60	20	7.53183
		1.06	3.75	1000000000000000	1.25	1e+16	60	60	7.78903					1.06	3.76	1000000000000000	1.25	1e+16	60	60	1.48775					1.06	3.75	1000000000000000	1.25	1e+16	60	60	7.51997
		1.06	3.75	1000000000000000	1.25	1e+16	60	100	7.78598					1.06	3.76	1000000000000000	1.25	1e+16	60	100	1.48794					1.06	3.75	1000000000000000	1.25	1e+16	60	100	7.51759
		1.06	3.75	1000000000000000	1.25	1e+16	100	20	8.72102					1.06	3.76	1000000000000000	1.25	1e+16	100	20	1.48637					1.06	3.75	1000000000000000	1.25	1e+16	100	20	8.38047
		1.06	3.75	1000000000000000	1.25	1e+16	100	60	8.70495					1.06	3.76	1000000000000000	1.25	1e+16	100	60	1.48732					1.06	3.75	1000000000000000	1.25	1e+16	100	60	8.36831
		1.06	3.75	1000000000000000	1.25	1e+16	100	100	8.70172					1.06	3.76	1000000000000000	1.25	1e+16	100	100	1.48752					1.06	3.75	1000000000000000	1.25	1e+16	100	100	8.36586
		1.06	3.75	1000000000000000	1.5	10000000000000	20	20	23.3594					1.06	3.76	1000000000000000	1.5	10000000000000	20	20	14.1011					1.06	3.75	1000000000000000	1.5	10000000000000	20	20	22.5566
		1.06	3.75	1000000000000000	1.5	10000000000000	20	60	23.3751					1.06	3.76	1000000000000000	1.5	10000000000000	20	60	14.1003					1.06	3.75	1000000000000000	1.5	10000000000000	20	60	22.5742
		1.06	3.75	1000000000000000	1.5	10000000000000	20	100	23.3782					1.06	3.76	1000000000000000	1.5	10000000000000	20	100	14.1001					1.06	3.75	1000000000000000	1.5	10000000000000	20	100	22.5777
		1.06	3.75	1000000000000000	1.5	10000000000000	60	20	23.4325					1.06	3.76	1000000000000000	1.5	10000000000000	60	20	14.2753					1.06	3.75	1000000000000000	1.5	10000000000000	60	20	22.6489
		1.06	3.75	1000000000000000	1.5	10000000000000	60	60	23.4495					1.06	3.76	1000000000000000	1.5	10000000000000	60	60	14.2745					1.06	3.75	1000000000000000	1.5	10000000000000	60	60	22.6683
		1.06	3.75	1000000000000000	1.5	10000000000000	60	100	23.4529					1.06	3.76	1000000000000000	1.5	10000000000000	60	100	14.2744					1.06	3.75	1000000000000000	1.5	10000000000000	60	100	22.6722
		1.06	3.75	1000000000000000	1.5	10000000000000	100	20	23.448					1.06	3.76	1000000000000000	1.5	10000000000000	100	20	14.3114					1.06	3.75	1000000000000000	1.5	10000000000000	100	20	22.6688
		1.06	3.75	1000000000000000	1.5	10000000000000	100	60	23.4652					1.06	3.76	1000000000000000	1.5	10000000000000	100	60	14.3106					1.06	3.75	1000000000000000	1.5	10000000000000	100	60	22.6887
		1.06	3.75	1000000000000000	1.5	10000000000000	100	100	23.4686					1.06	3.76	1000000000000000	1.5	10000000000000	100	100	14.3105					1.06	3.75	1000000000000000	1.5	10000000000000	100	100	22.6926
		1.06	3.75	1000000000000000	1.5	100000000000000	20	20	19.7442					1.06	3.76	1000000000000000	1.5	100000000000000	20	20	6.412					1.06	3.75	1000000000000000	1.5	100000000000000	20	20	18.9439
		1.06	3.75	1000000000000000	1.5	100000000000000	20	60	19.7488					1.06	3.76	1000000000000000	1.5	100000000000000	20	60	6.41013					1.06	3.75	1000000000000000	1.5	100000000000000	20	60	18.9466
		1.06	3.75	1000000000000000	1.5	100000000000000	20	100	19.7497					1.06	3.76	1000000000000000	1.5	100000000000000	20	100	6.40975					1.06	3.75	1000000000000000	1.5	100000000000000	20	100	18.9472
		1.06	3.75	1000000000000000	1.5	100000000000000	60	20	20.4123					1.06	3.76	1000000000000000	1.5	100000000000000	60	20	6.91455					1.06	3.75	1000000000000000	1.5	100000000000000	60	20	19.677
		1.06	3.75	1000000000000000	1.5	100000000000000	60	60	20.4224					1.06	3.76	1000000000000000	1.5	100000000000000	60	60	6.91393					1.06	3.75	1000000000000000	1.5	100000000000000	60	60	19.6848
		1.06	3.75	1000000000000000	1.5	100000000000000	60	100	20.4244					1.06	3.76	1000000000000000	1.5	100000000000000	60	100	6.9138					1.06	3.75	1000000000000000	1.5	100000000000000	60	100	19.6864
		1.06	3.75	1000000000000000	1.5	100000000000000	100	20	20.5661					1.06	3.76	1000000000000000	1.5	100000000000000	100	20	7.03201					1.06	3.75	1000000000000000	1.5	100000000000000	100	20	19.848
		1.06	3.75	1000000000000000	1.5	100000000000000	100	60	20.5776					1.06	3.76	1000000000000000	1.5	100000000000000	100	60	7.03178					1.06	3.75	1000000000000000	1.5	100000000000000	100	60	19.8572
		1.06	3.75	1000000000000000	1.5	100000000000000	100	100	20.5799					1.06	3.76	1000000000000000	1.5	100000000000000	100	100	7.03173					1.06	3.75	1000000000000000	1.5	100000000000000	100	100	19.8591
		1.06	3.75	1000000000000000	1.5	1000000000000000	20	20	12.4366					1.06	3.76	1000000000000000	1.5	1000000000000000	20	20	1.68955					1.06	3.75	1000000000000000	1.5	1000000000000000	20	20	11.6246
		1.06	3.75	1000000000000000	1.5	1000000000000000	20	60	12.4153					1.06	3.76	1000000000000000	1.5	1000000000000000	20	60	1.6871					1.06	3.75	1000000000000000	1.5	1000000000000000	20	60	11.607
		1.06	3.75	1000000000000000	1.5	1000000000000000	20	100	12.411					1.06	3.76	1000000000000000	1.5	1000000000000000	20	100	1.6866					1.06	3.75	1000000000000000	1.5	1000000000000000	20	100	11.6034
		1.06	3.75	1000000000000000	1.5	1000000000000000	60	20	14.7177					1.06	3.76	1000000000000000	1.5	1000000000000000	60	20	2.20447					1.06	3.75	1000000000000000	1.5	1000000000000000	60	20	13.7603
		1.06	3.75	1000000000000000	1.5	1000000000000000	60	60	14.7045					1.06	3.76	1000000000000000	1.5	1000000000000000	60	60	2.20227					1.06	3.75	1000000000000000	1.5	1000000000000000	60	60	13.7491
		1.06	3.75	1000000000000000	1.5	1000000000000000	60	100	14.7018					1.06	3.76	1000000000000000	1.5	1000000000000000	60	100	2.20182					1.06	3.75	1000000000000000	1.5	1000000000000000	60	100	13.7468
		1.06	3.75	1000000000000000	1.5	1000000000000000	100	20	15.374					1.06	3.76	1000000000000000	1.5	1000000000000000	100	20	2.3856					1.06	3.75	1000000000000000	1.5	1000000000000000	100	20	14.385
		1.06	3.75	1000000000000000	1.5	1000000000000000	100	60	15.365					1.06	3.76	1000000000000000	1.5	1000000000000000	100	60	2.3839					1.06	3.75	1000000000000000	1.5	1000000000000000	100	60	14.3772
		1.06	3.75	1000000000000000	1.5	1000000000000000	100	100	15.3631					1.06	3.76	1000000000000000	1.5	1000000000000000	100	100	2.38356					1.06	3.75	1000000000000000	1.5	1000000000000000	100	100	14.3756
		1.06	3.75	1000000000000000	1.5	1e+16	20	20	5.48909					1.06	3.76	1000000000000000	1.5	1e+16	20	20	1.48812					1.06	3.75	1000000000000000	1.5	1e+16	20	20	5.38377
		1.06	3.75	1000000000000000	1.5	1e+16	20	60	5.48044					1.06	3.76	1000000000000000	1.5	1e+16	20	60	1.48923					1.06	3.75	1000000000000000	1.5	1e+16	20	60	5.37729
		1.06	3.75	1000000000000000	1.5	1e+16	20	100	5.47871					1.06	3.76	1000000000000000	1.5	1e+16	20	100	1.48945					1.06	3.75	1000000000000000	1.5	1e+16	20	100	5.37599
		1.06	3.75	1000000000000000	1.5	1e+16	60	20	7.35444					1.06	3.76	1000000000000000	1.5	1e+16	60	20	1.48588					1.06	3.75	1000000000000000	1.5	1e+16	60	20	7.13007
		1.06	3.75	1000000000000000	1.5	1e+16	60	60	7.33687					1.06	3.76	1000000000000000	1.5	1e+16	60	60	1.48712					1.06	3.75	1000000000000000	1.5	1e+16	60	60	7.11643
		1.06	3.75	1000000000000000	1.5	1e+16	60	100	7.33334					1.06	3.76	1000000000000000	1.5	1e+16	60	100	1.48737					1.06	3.75	1000000000000000	1.5	1e+16	60	100	7.11368
		1.06	3.75	1000000000000000	1.5	1e+16	100	20	8.20981					1.06	3.76	1000000000000000	1.5	1e+16	100	20	1.48535					1.06	3.75	1000000000000000	1.5	1e+16	100	20	7.92869
		1.06	3.75	1000000000000000	1.5	1e+16	100	60	8.19003					1.06	3.76	1000000000000000	1.5	1e+16	100	60	1.48663					1.06	3.75	1000000000000000	1.5	1e+16	100	60	7.91365
		1.06	3.75	1000000000000000	1.5	1e+16	100	100	8.18605					1.06	3.76	1000000000000000	1.5	1e+16	100	100	1.48689					1.06	3.75	1000000000000000	1.5	1e+16	100	100	7.91061
		1.06	3.75	1000000000000000	1.75	10000000000000	20	20	23.418					1.06	3.76	1000000000000000	1.75	10000000000000	20	20	13.6695					1.06	3.75	1000000000000000	1.75	10000000000000	20	20	22.6272
		1.06	3.75	1000000000000000	1.75	10000000000000	20	60	23.437					1.06	3.76	1000000000000000	1.75	10000000000000	20	60	13.6685					1.06	3.75	1000000000000000	1.75	10000000000000	20	60	22.6483
		1.06	3.75	1000000000000000	1.75	10000000000000	20	100	23.4408					1.06	3.76	1000000000000000	1.75	10000000000000	20	100	13.6682					1.06	3.75	1000000000000000	1.75	10000000000000	20	100	22.6525
		1.06	3.75	1000000000000000	1.75	10000000000000	60	20	23.5044					1.06	3.76	1000000000000000	1.75	10000000000000	60	20	13.8555					1.06	3.75	1000000000000000	1.75	10000000000000	60	20	22.7355
		1.06	3.75	1000000000000000	1.75	10000000000000	60	60	23.5252					1.06	3.76	1000000000000000	1.75	10000000000000	60	60	13.8546					1.06	3.75	1000000000000000	1.75	10000000000000	60	60	22.759
		1.06	3.75	1000000000000000	1.75	10000000000000	60	100	23.5293					1.06	3.76	1000000000000000	1.75	10000000000000	60	100	13.8544					1.06	3.75	1000000000000000	1.75	10000000000000	60	100	22.7637
		1.06	3.75	1000000000000000	1.75	10000000000000	100	20	23.5227					1.06	3.76	1000000000000000	1.75	10000000000000	100	20	13.8941					1.06	3.75	1000000000000000	1.75	10000000000000	100	20	22.759
		1.06	3.75	1000000000000000	1.75	10000000000000	100	60	23.5438					1.06	3.76	1000000000000000	1.75	10000000000000	100	60	13.8932					1.06	3.75	1000000000000000	1.75	10000000000000	100	60	22.7831
		1.06	3.75	1000000000000000	1.75	10000000000000	100	100	23.548					1.06	3.76	1000000000000000	1.75	10000000000000	100	100	13.8931					1.06	3.75	1000000000000000	1.75	10000000000000	100	100	22.7879
		1.06	3.75	1000000000000000	1.75	100000000000000	20	20	19.4687					1.06	3.76	1000000000000000	1.75	100000000000000	20	20	5.98352					1.06	3.75	1000000000000000	1.75	100000000000000	20	20	18.6277
		1.06	3.75	1000000000000000	1.75	100000000000000	20	60	19.4721					1.06	3.76	1000000000000000	1.75	100000000000000	20	60	5.98087					1.06	3.75	1000000000000000	1.75	100000000000000	20	60	18.6285
		1.06	3.75	1000000000000000	1.75	100000000000000	20	100	19.4727					1.06	3.76	1000000000000000	1.75	100000000000000	20	100	5.98032					1.06	3.75	1000000000000000	1.75	100000000000000	20	100	18.6287
		1.06	3.75	1000000000000000	1.75	100000000000000	60	20	20.2346					1.06	3.76	1000000000000000	1.75	100000000000000	60	20	6.51633					1.06	3.75	1000000000000000	1.75	100000000000000	60	20	19.4587
		1.06	3.75	1000000000000000	1.75	100000000000000	60	60	20.2453					1.06	3.76	1000000000000000	1.75	100000000000000	60	60	6.51525					1.06	3.75	1000000000000000	1.75	100000000000000	60	60	19.4665
		1.06	3.75	1000000000000000	1.75	100000000000000	60	100	20.2475					1.06	3.76	1000000000000000	1.75	100000000000000	60	100	6.51503					1.06	3.75	1000000000000000	1.75	100000000000000	60	100	19.468
		1.06	3.75	1000000000000000	1.75	100000000000000	100	20	20.4128					1.06	3.76	1000000000000000	1.75	100000000000000	100	20	6.64312					1.06	3.75	1000000000000000	1.75	100000000000000	100	20	19.6548
		1.06	3.75	1000000000000000	1.75	100000000000000	100	60	20.4256					1.06	3.76	1000000000000000	1.75	100000000000000	100	60	6.64259					1.06	3.75	1000000000000000	1.75	100000000000000	100	60	19.6646
		1.06	3.75	1000000000000000	1.75	100000000000000	100	100	20.4282					1.06	3.76	1000000000000000	1.75	100000000000000	100	100	6.64248					1.06	3.75	1000000000000000	1.75	100000000000000	100	100	19.6665
		1.06	3.75	1000000000000000	1.75	1000000000000000	20	20	11.9176					1.06	3.76	1000000000000000	1.75	1000000000000000	20	20	1.53963					1.06	3.75	1000000000000000	1.75	1000000000000000	20	20	11.1531
		1.06	3.75	1000000000000000	1.75	1000000000000000	20	60	11.8902					1.06	3.76	1000000000000000	1.75	1000000000000000	20	60	1.53697					1.06	3.75	1000000000000000	1.75	1000000000000000	20	60	11.1309
		1.06	3.75	1000000000000000	1.75	1000000000000000	20	100	11.8847					1.06	3.76	1000000000000000	1.75	1000000000000000	20	100	1.53644					1.06	3.75	1000000000000000	1.75	1000000000000000	20	100	11.1264
		1.06	3.75	1000000000000000	1.75	1000000000000000	60	20	14.2817					1.06	3.76	1000000000000000	1.75	1000000000000000	60	20	2.00667					1.06	3.75	1000000000000000	1.75	1000000000000000	60	20	13.347
		1.06	3.75	1000000000000000	1.75	1000000000000000	60	60	14.2627					1.06	3.76	1000000000000000	1.75	1000000000000000	60	60	2.00399					1.06	3.75	1000000000000000	1.75	1000000000000000	60	60	13.3314
		1.06	3.75	1000000000000000	1.75	1000000000000000	60	100	14.2588					1.06	3.76	1000000000000000	1.75	1000000000000000	60	100	2.00345					1.06	3.75	1000000000000000	1.75	1000000000000000	60	100	13.3282
		1.06	3.75	1000000000000000	1.75	1000000000000000	100	20	14.9843					1.06	3.76	1000000000000000	1.75	1000000000000000	100	20	2.17653					1.06	3.75	1000000000000000	1.75	1000000000000000	100	20	14.0106
		1.06	3.75	1000000000000000	1.75	1000000000000000	100	60	14.9703					1.06	3.76	1000000000000000	1.75	1000000000000000	100	60	2.17437					1.06	3.75	1000000000000000	1.75	1000000000000000	100	60	13.9991
		1.06	3.75	1000000000000000	1.75	1000000000000000	100	100	14.9674					1.06	3.76	1000000000000000	1.75	1000000000000000	100	100	2.17393					1.06	3.75	1000000000000000	1.75	1000000000000000	100	100	13.9968
		1.06	3.75	1000000000000000	1.75	1e+16	20	20	5.37492					1.06	3.76	1000000000000000	1.75	1e+16	20	20	1.48766					1.06	3.75	1000000000000000	1.75	1e+16	20	20	5.27818
		1.06	3.75	1000000000000000	1.75	1e+16	20	60	5.3672					1.06	3.76	1000000000000000	1.75	1e+16	20	60	1.48898					1.06	3.75	1000000000000000	1.75	1e+16	20	60	5.27288
		1.06	3.75	1000000000000000	1.75	1e+16	20	100	5.36566					1.06	3.76	1000000000000000	1.75	1e+16	20	100	1.48924					1.06	3.75	1000000000000000	1.75	1e+16	20	100	5.27182
		1.06	3.75	1000000000000000	1.75	1e+16	60	20	7.04158					1.06	3.76	1000000000000000	1.75	1e+16	60	20	1.48515					1.06	3.75	1000000000000000	1.75	1e+16	60	20	6.84937
		1.06	3.75	1000000000000000	1.75	1e+16	60	60	7.0229					1.06	3.76	1000000000000000	1.75	1e+16	60	60	1.48668					1.06	3.75	1000000000000000	1.75	1e+16	60	60	6.83507
		1.06	3.75	1000000000000000	1.75	1e+16	60	100	7.01914					1.06	3.76	1000000000000000	1.75	1e+16	60	100	1.48699					1.06	3.75	1000000000000000	1.75	1e+16	60	100	6.83219
		1.06	3.75	1000000000000000	1.75	1e+16	100	20	7.82403					1.06	3.76	1000000000000000	1.75	1e+16	100	20	1.48454					1.06	3.75	1000000000000000	1.75	1e+16	100	20	7.58626
		1.06	3.75	1000000000000000	1.75	1e+16	100	60	7.80172					1.06	3.76	1000000000000000	1.75	1e+16	100	60	1.48614					1.06	3.75	1000000000000000	1.75	1e+16	100	60	7.56933
		1.06	3.75	1000000000000000	1.75	1e+16	100	100	7.79723					1.06	3.76	1000000000000000	1.75	1e+16	100	100	1.48646					1.06	3.75	1000000000000000	1.75	1e+16	100	100	7.56591
		1.06	3.75	1e+16	0.75	10000000000000	20	20	22.0882					1.06	3.76	1e+16	0.75	10000000000000	20	20	15.2348					1.06	3.75	1e+16	0.75	10000000000000	20	20	21.2435
		1.06	3.75	1e+16	0.75	10000000000000	20	60	22.0894					1.06	3.76	1e+16	0.75	10000000000000	20	60	15.2345					1.06	3.75	1e+16	0.75	10000000000000	20	60	21.2449
		1.06	3.75	1e+16	0.75	10000000000000	20	100	22.0897					1.06	3.76	1e+16	0.75	10000000000000	20	100	15.2345					1.06	3.75	1e+16	0.75	10000000000000	20	100	21.2451
		1.06	3.75	1e+16	0.75	10000000000000	60	20	22.1081					1.06	3.76	1e+16	0.75	10000000000000	60	20	15.3679					1.06	3.75	1e+16	0.75	10000000000000	60	20	21.2648
		1.06	3.75	1e+16	0.75	10000000000000	60	60	22.1094					1.06	3.76	1e+16	0.75	10000000000000	60	60	15.3677					1.06	3.75	1e+16	0.75	10000000000000	60	60	21.2662
		1.06	3.75	1e+16	0.75	10000000000000	60	100	22.1097					1.06	3.76	1e+16	0.75	10000000000000	60	100	15.3676					1.06	3.75	1e+16	0.75	10000000000000	60	100	21.2665
		1.06	3.75	1e+16	0.75	10000000000000	100	20	22.1121					1.06	3.76	1e+16	0.75	10000000000000	100	20	15.3952					1.06	3.75	1e+16	0.75	10000000000000	100	20	21.2691
		1.06	3.75	1e+16	0.75	10000000000000	100	60	22.1134					1.06	3.76	1e+16	0.75	10000000000000	100	60	15.395					1.06	3.75	1e+16	0.75	10000000000000	100	60	21.2705
		1.06	3.75	1e+16	0.75	10000000000000	100	100	22.1137					1.06	3.76	1e+16	0.75	10000000000000	100	100	15.395					1.06	3.75	1e+16	0.75	10000000000000	100	100	21.2708
		1.06	3.75	1e+16	0.75	100000000000000	20	20	21.2296					1.06	3.76	1e+16	0.75	100000000000000	20	20	9.69131					1.06	3.75	1e+16	0.75	100000000000000	20	20	20.5665
		1.06	3.75	1e+16	0.75	100000000000000	20	60	21.2306					1.06	3.76	1e+16	0.75	100000000000000	20	60	9.69126					1.06	3.75	1e+16	0.75	100000000000000	20	60	20.5676
		1.06	3.75	1e+16	0.75	100000000000000	20	100	21.2308					1.06	3.76	1e+16	0.75	100000000000000	20	100	9.69125					1.06	3.75	1e+16	0.75	100000000000000	20	100	20.5678
		1.06	3.75	1e+16	0.75	100000000000000	60	20	21.3787					1.06	3.76	1e+16	0.75	100000000000000	60	20	10.0467					1.06	3.75	1e+16	0.75	100000000000000	60	20	20.7353
		1.06	3.75	1e+16	0.75	100000000000000	60	60	21.3798					1.06	3.76	1e+16	0.75	100000000000000	60	60	10.0472					1.06	3.75	1e+16	0.75	100000000000000	60	60	20.7365
		1.06	3.75	1e+16	0.75	100000000000000	60	100	21.38					1.06	3.76	1e+16	0.75	100000000000000	60	100	10.0472					1.06	3.75	1e+16	0.75	100000000000000	60	100	20.7367
		1.06	3.75	1e+16	0.75	100000000000000	100	20	21.4091					1.06	3.76	1e+16	0.75	100000000000000	100	20	10.1235					1.06	3.75	1e+16	0.75	100000000000000	100	20	20.7699
		1.06	3.75	1e+16	0.75	100000000000000	100	60	21.4102					1.06	3.76	1e+16	0.75	100000000000000	100	60	10.1236					1.06	3.75	1e+16	0.75	100000000000000	100	60	20.7711
		1.06	3.75	1e+16	0.75	100000000000000	100	100	21.4104					1.06	3.76	1e+16	0.75	100000000000000	100	100	10.1236					1.06	3.75	1e+16	0.75	100000000000000	100	100	20.7713
		1.06	3.75	1e+16	0.75	1000000000000000	20	20	18.283					1.06	3.76	1e+16	0.75	1000000000000000	20	20	5.15723					1.06	3.75	1e+16	0.75	1000000000000000	20	20	17.5358
		1.06	3.75	1e+16	0.75	1000000000000000	20	60	18.2831					1.06	3.76	1e+16	0.75	1000000000000000	20	60	5.15707					1.06	3.75	1e+16	0.75	1000000000000000	20	60	17.5358
		1.06	3.75	1e+16	0.75	1000000000000000	20	100	18.2832					1.06	3.76	1e+16	0.75	1000000000000000	20	100	5.15704					1.06	3.75	1e+16	0.75	1000000000000000	20	100	17.5358
		1.06	3.75	1e+16	0.75	1000000000000000	60	20	19.0981					1.06	3.76	1e+16	0.75	1000000000000000	60	20	5.8448					1.06	3.75	1e+16	0.75	1000000000000000	60	20	18.4297
		1.06	3.75	1e+16	0.75	1000000000000000	60	60	19.0986					1.06	3.76	1e+16	0.75	1000000000000000	60	60	5.84478					1.06	3.75	1e+16	0.75	1000000000000000	60	60	18.4301
		1.06	3.75	1e+16	0.75	1000000000000000	60	100	19.0987					1.06	3.76	1e+16	0.75	1000000000000000	60	100	5.84478					1.06	3.75	1e+16	0.75	1000000000000000	60	100	18.4302
		1.06	3.75	1e+16	0.75	1000000000000000	100	20	19.2757					1.06	3.76	1e+16	0.75	1000000000000000	100	20	6.01251					1.06	3.75	1e+16	0.75	1000000000000000	100	20	18.6277
		1.06	3.75	1e+16	0.75	1000000000000000	100	60	19.2763					1.06	3.76	1e+16	0.75	1000000000000000	100	60	6.01254					1.06	3.75	1e+16	0.75	1000000000000000	100	60	18.6282
		1.06	3.75	1e+16	0.75	1000000000000000	100	100	19.2764					1.06	3.76	1e+16	0.75	1000000000000000	100	100	6.01255					1.06	3.75	1e+16	0.75	1000000000000000	100	100	18.6283
		1.06	3.75	1e+16	0.75	1e+16	20	20	11.8562					1.06	3.76	1e+16	0.75	1e+16	20	20	1.89312					1.06	3.75	1e+16	0.75	1e+16	20	20	11.1411
		1.06	3.75	1e+16	0.75	1e+16	20	60	11.8553					1.06	3.76	1e+16	0.75	1e+16	20	60	1.89304					1.06	3.75	1e+16	0.75	1e+16	20	60	11.1403
		1.06	3.75	1e+16	0.75	1e+16	20	100	11.8552					1.06	3.76	1e+16	0.75	1e+16	20	100	1.89302					1.06	3.75	1e+16	0.75	1e+16	20	100	11.1402
		1.06	3.75	1e+16	0.75	1e+16	60	20	14.2594					1.06	3.76	1e+16	0.75	1e+16	60	20	2.45908					1.06	3.75	1e+16	0.75	1e+16	60	20	13.4164
		1.06	3.75	1e+16	0.75	1e+16	60	60	14.2589					1.06	3.76	1e+16	0.75	1e+16	60	60	2.45901					1.06	3.75	1e+16	0.75	1e+16	60	60	13.4159
		1.06	3.75	1e+16	0.75	1e+16	60	100	14.2588					1.06	3.76	1e+16	0.75	1e+16	60	100	2.459					1.06	3.75	1e+16	0.75	1e+16	60	100	13.4158
		1.06	3.75	1e+16	0.75	1e+16	100	20	14.9532					1.06	3.76	1e+16	0.75	1e+16	100	20	2.6542					1.06	3.75	1e+16	0.75	1e+16	100	20	14.0801
		1.06	3.75	1e+16	0.75	1e+16	100	60	14.9529					1.06	3.76	1e+16	0.75	1e+16	100	60	2.65416					1.06	3.75	1e+16	0.75	1e+16	100	60	14.0798
		1.06	3.75	1e+16	0.75	1e+16	100	100	14.9528					1.06	3.76	1e+16	0.75	1e+16	100	100	2.65416					1.06	3.75	1e+16	0.75	1e+16	100	100	14.0798
		1.06	3.75	1e+16	1	10000000000000	20	20	23.1445					1.06	3.76	1e+16	1	10000000000000	20	20	15.2068					1.06	3.75	1e+16	1	10000000000000	20	20	22.2632
		1.06	3.75	1e+16	1	10000000000000	20	60	23.1465					1.06	3.76	1e+16	1	10000000000000	20	60	15.2064					1.06	3.75	1e+16	1	10000000000000	20	60	22.2653
		1.06	3.75	1e+16	1	10000000000000	20	100	23.1469					1.06	3.76	1e+16	1	10000000000000	20	100	15.2064					1.06	3.75	1e+16	1	10000000000000	20	100	22.2657
		1.06	3.75	1e+16	1	10000000000000	60	20	23.1734					1.06	3.76	1e+16	1	10000000000000	60	20	15.3606					1.06	3.75	1e+16	1	10000000000000	60	20	22.2943
		1.06	3.75	1e+16	1	10000000000000	60	60	23.1754					1.06	3.76	1e+16	1	10000000000000	60	60	15.3603					1.06	3.75	1e+16	1	10000000000000	60	60	22.2964
		1.06	3.75	1e+16	1	10000000000000	60	100	23.1758					1.06	3.76	1e+16	1	10000000000000	60	100	15.3602					1.06	3.75	1e+16	1	10000000000000	60	100	22.2968
		1.06	3.75	1e+16	1	10000000000000	100	20	23.1792					1.06	3.76	1e+16	1	10000000000000	100	20	15.3923					1.06	3.75	1e+16	1	10000000000000	100	20	22.3005
		1.06	3.75	1e+16	1	10000000000000	100	60	23.1813					1.06	3.76	1e+16	1	10000000000000	100	60	15.392					1.06	3.75	1e+16	1	10000000000000	100	60	22.3027
		1.06	3.75	1e+16	1	10000000000000	100	100	23.1817					1.06	3.76	1e+16	1	10000000000000	100	100	15.3919					1.06	3.75	1e+16	1	10000000000000	100	100	22.3031
		1.06	3.75	1e+16	1	100000000000000	20	20	22.0088					1.06	3.76	1e+16	1	100000000000000	20	20	9.44124					1.06	3.75	1e+16	1	100000000000000	20	20	21.3252
		1.06	3.75	1e+16	1	100000000000000	20	60	22.0102					1.06	3.76	1e+16	1	100000000000000	20	60	9.44112					1.06	3.75	1e+16	1	100000000000000	20	60	21.3266
		1.06	3.75	1e+16	1	100000000000000	20	100	22.0105					1.06	3.76	1e+16	1	100000000000000	20	100	9.4411					1.06	3.75	1e+16	1	100000000000000	20	100	21.3269
		1.06	3.75	1e+16	1	100000000000000	60	20	22.2195					1.06	3.76	1e+16	1	100000000000000	60	20	9.86034					1.06	3.75	1e+16	1	100000000000000	60	20	21.5646
		1.06	3.75	1e+16	1	100000000000000	60	60	22.221					1.06	3.76	1e+16	1	100000000000000	60	60	9.86039					1.06	3.75	1e+16	1	100000000000000	60	60	21.5663
		1.06	3.75	1e+16	1	100000000000000	60	100	22.2213					1.06	3.76	1e+16	1	100000000000000	60	100	9.8604					1.06	3.75	1e+16	1	100000000000000	60	100	21.5666
		1.06	3.75	1e+16	1	100000000000000	100	20	22.2626					1.06	3.76	1e+16	1	100000000000000	100	20	9.95402					1.06	3.75	1e+16	1	100000000000000	100	20	21.6129
		1.06	3.75	1e+16	1	100000000000000	100	60	22.2642					1.06	3.76	1e+16	1	100000000000000	100	60	9.95411					1.06	3.75	1e+16	1	100000000000000	100	60	21.6146
		1.06	3.75	1e+16	1	100000000000000	100	100	22.2646					1.06	3.76	1e+16	1	100000000000000	100	100	9.95413					1.06	3.75	1e+16	1	100000000000000	100	100	21.615
		1.06	3.75	1e+16	1	1000000000000000	20	20	18.4073					1.06	3.76	1e+16	1	1000000000000000	20	20	4.80113					1.06	3.75	1e+16	1	1000000000000000	20	20	17.5793
		1.06	3.75	1e+16	1	1000000000000000	20	60	18.4071					1.06	3.76	1e+16	1	1000000000000000	20	60	4.80084					1.06	3.75	1e+16	1	1000000000000000	20	60	17.5791
		1.06	3.75	1e+16	1	1000000000000000	20	100	18.4071					1.06	3.76	1e+16	1	1000000000000000	20	100	4.80078					1.06	3.75	1e+16	1	1000000000000000	20	100	17.579
		1.06	3.75	1e+16	1	1000000000000000	60	20	19.4884					1.06	3.76	1e+16	1	1000000000000000	60	20	5.54693					1.06	3.75	1e+16	1	1000000000000000	60	20	18.7299
		1.06	3.75	1e+16	1	1000000000000000	60	60	19.489					1.06	3.76	1e+16	1	1000000000000000	60	60	5.54685					1.06	3.75	1e+16	1	1000000000000000	60	60	18.7303
		1.06	3.75	1e+16	1	1000000000000000	60	100	19.4891					1.06	3.76	1e+16	1	1000000000000000	60	100	5.54684					1.06	3.75	1e+16	1	1000000000000000	60	100	18.7304
		1.06	3.75	1e+16	1	1000000000000000	100	20	19.73					1.06	3.76	1e+16	1	1000000000000000	100	20	5.73561					1.06	3.75	1e+16	1	1000000000000000	100	20	18.9924
		1.06	3.75	1e+16	1	1000000000000000	100	60	19.7308					1.06	3.76	1e+16	1	1000000000000000	100	60	5.73561					1.06	3.75	1e+16	1	1000000000000000	100	60	18.993
		1.06	3.75	1e+16	1	1000000000000000	100	100	19.7309					1.06	3.76	1e+16	1	1000000000000000	100	100	5.73561					1.06	3.75	1e+16	1	1000000000000000	100	100	18.9931
		1.06	3.75	1e+16	1	1e+16	20	20	11.3323					1.06	3.76	1e+16	1	1e+16	20	20	1.73558					1.06	3.75	1e+16	1	1e+16	20	20	10.6517
		1.06	3.75	1e+16	1	1e+16	20	60	11.3311					1.06	3.76	1e+16	1	1e+16	20	60	1.73551					1.06	3.75	1e+16	1	1e+16	20	60	10.6506
		1.06	3.75	1e+16	1	1e+16	20	100	11.3309					1.06	3.76	1e+16	1	1e+16	20	100	1.7355					1.06	3.75	1e+16	1	1e+16	20	100	10.6504
		1.06	3.75	1e+16	1	1e+16	60	20	13.9107					1.06	3.76	1e+16	1	1e+16	60	20	2.21875					1.06	3.75	1e+16	1	1e+16	60	20	13.064
		1.06	3.75	1e+16	1	1e+16	60	60	13.9097					1.06	3.76	1e+16	1	1e+16	60	60	2.21867					1.06	3.75	1e+16	1	1e+16	60	60	13.0631
		1.06	3.75	1e+16	1	1e+16	60	100	13.9095					1.06	3.76	1e+16	1	1e+16	60	100	2.21865					1.06	3.75	1e+16	1	1e+16	60	100	13.063
		1.06	3.75	1e+16	1	1e+16	100	20	14.7361					1.06	3.76	1e+16	1	1e+16	100	20	2.40193					1.06	3.75	1e+16	1	1e+16	100	20	13.8424
		1.06	3.75	1e+16	1	1e+16	100	60	14.7353					1.06	3.76	1e+16	1	1e+16	100	60	2.40187					1.06	3.75	1e+16	1	1e+16	100	60	13.8418
		1.06	3.75	1e+16	1	1e+16	100	100	14.7352					1.06	3.76	1e+16	1	1e+16	100	100	2.40185					1.06	3.75	1e+16	1	1e+16	100	100	13.8417
		1.06	3.75	1e+16	1.25	10000000000000	20	20	23.6762					1.06	3.76	1e+16	1.25	10000000000000	20	20	14.935					1.06	3.75	1e+16	1.25	10000000000000	20	20	22.7847
		1.06	3.75	1e+16	1.25	10000000000000	20	60	23.6789					1.06	3.76	1e+16	1.25	10000000000000	20	60	14.9345					1.06	3.75	1e+16	1.25	10000000000000	20	60	22.7876
		1.06	3.75	1e+16	1.25	10000000000000	20	100	23.6795					1.06	3.76	1e+16	1.25	10000000000000	20	100	14.9344					1.06	3.75	1e+16	1.25	10000000000000	20	100	22.7881
		1.06	3.75	1e+16	1.25	10000000000000	60	20	23.7139					1.06	3.76	1e+16	1.25	10000000000000	60	20	15.1064					1.06	3.75	1e+16	1.25	10000000000000	60	20	22.8253
		1.06	3.75	1e+16	1.25	10000000000000	60	60	23.7166					1.06	3.76	1e+16	1.25	10000000000000	60	60	15.106					1.06	3.75	1e+16	1.25	10000000000000	60	60	22.8283
		1.06	3.75	1e+16	1.25	10000000000000	60	100	23.7172					1.06	3.76	1e+16	1.25	10000000000000	60	100	15.1059					1.06	3.75	1e+16	1.25	10000000000000	60	100	22.8289
		1.06	3.75	1e+16	1.25	10000000000000	100	20	23.7215					1.06	3.76	1e+16	1.25	10000000000000	100	20	15.1419					1.06	3.75	1e+16	1.25	10000000000000	100	20	22.8336
		1.06	3.75	1e+16	1.25	10000000000000	100	60	23.7243					1.06	3.76	1e+16	1.25	10000000000000	100	60	15.1415					1.06	3.75	1e+16	1.25	10000000000000	100	60	22.8365
		1.06	3.75	1e+16	1.25	10000000000000	100	100	23.7248					1.06	3.76	1e+16	1.25	10000000000000	100	100	15.1414					1.06	3.75	1e+16	1.25	10000000000000	100	100	22.8371
		1.06	3.75	1e+16	1.25	100000000000000	20	20	22.3102					1.06	3.76	1e+16	1.25	100000000000000	20	20	9.13167					1.06	3.75	1e+16	1.25	100000000000000	20	20	21.6153
		1.06	3.75	1e+16	1.25	100000000000000	20	60	22.312					1.06	3.76	1e+16	1.25	100000000000000	20	60	9.13145					1.06	3.75	1e+16	1.25	100000000000000	20	60	21.6171
		1.06	3.75	1e+16	1.25	100000000000000	20	100	22.3123					1.06	3.76	1e+16	1.25	100000000000000	20	100	9.1314					1.06	3.75	1e+16	1.25	100000000000000	20	100	21.6174
		1.06	3.75	1e+16	1.25	100000000000000	60	20	22.5779					1.06	3.76	1e+16	1.25	100000000000000	60	20	9.59922					1.06	3.75	1e+16	1.25	100000000000000	60	20	21.9194
		1.06	3.75	1e+16	1.25	100000000000000	60	60	22.5799					1.06	3.76	1e+16	1.25	100000000000000	60	60	9.59925					1.06	3.75	1e+16	1.25	100000000000000	60	60	21.9215
		1.06	3.75	1e+16	1.25	100000000000000	60	100	22.5803					1.06	3.76	1e+16	1.25	100000000000000	60	100	9.59925					1.06	3.75	1e+16	1.25	100000000000000	60	100	21.9219
		1.06	3.75	1e+16	1.25	100000000000000	100	20	22.6331					1.06	3.76	1e+16	1.25	100000000000000	100	20	9.70229					1.06	3.75	1e+16	1.25	100000000000000	100	20	21.9825
		1.06	3.75	1e+16	1.25	100000000000000	100	60	22.6352					1.06	3.76	1e+16	1.25	100000000000000	100	60	9.70238					1.06	3.75	1e+16	1.25	100000000000000	100	60	21.9847
		1.06	3.75	1e+16	1.25	100000000000000	100	100	22.6356					1.06	3.76	1e+16	1.25	100000000000000	100	100	9.7024					1.06	3.75	1e+16	1.25	100000000000000	100	100	21.9851
		1.06	3.75	1e+16	1.25	1000000000000000	20	20	18.2177					1.06	3.76	1e+16	1.25	1000000000000000	20	20	4.48909					1.06	3.75	1e+16	1.25	1000000000000000	20	20	17.3405
		1.06	3.75	1e+16	1.25	1000000000000000	20	60	18.2171					1.06	3.76	1e+16	1.25	1000000000000000	20	60	4.48868					1.06	3.75	1e+16	1.25	1000000000000000	20	60	17.3398
		1.06	3.75	1e+16	1.25	1000000000000000	20	100	18.217					1.06	3.76	1e+16	1.25	1000000000000000	20	100	4.4886					1.06	3.75	1e+16	1.25	1000000000000000	20	100	17.3396
		1.06	3.75	1e+16	1.25	1000000000000000	60	20	19.5029					1.06	3.76	1e+16	1.25	1000000000000000	60	20	5.25712					1.06	3.75	1e+16	1.25	1000000000000000	60	20	18.6887
		1.06	3.75	1e+16	1.25	1000000000000000	60	60	19.5034					1.06	3.76	1e+16	1.25	1000000000000000	60	60	5.25698					1.06	3.75	1e+16	1.25	1000000000000000	60	60	18.689
		1.06	3.75	1e+16	1.25	1000000000000000	60	100	19.5035					1.06	3.76	1e+16	1.25	1000000000000000	60	100	5.25695					1.06	3.75	1e+16	1.25	1000000000000000	60	100	18.689
		1.06	3.75	1e+16	1.25	1000000000000000	100	20	19.8003					1.06	3.76	1e+16	1.25	1000000000000000	100	20	5.45803					1.06	3.75	1e+16	1.25	1000000000000000	100	20	19.0051
		1.06	3.75	1e+16	1.25	1000000000000000	100	60	19.8012					1.06	3.76	1e+16	1.25	1000000000000000	100	60	5.45799					1.06	3.75	1e+16	1.25	1000000000000000	100	60	19.0056
		1.06	3.75	1e+16	1.25	1000000000000000	100	100	19.8013					1.06	3.76	1e+16	1.25	1000000000000000	100	100	5.45798					1.06	3.75	1e+16	1.25	1000000000000000	100	100	19.0057
		1.06	3.75	1e+16	1.25	1e+16	20	20	10.9576					1.06	3.76	1e+16	1.25	1e+16	20	20	1.64978					1.06	3.75	1e+16	1.25	1e+16	20	20	10.3067
		1.06	3.75	1e+16	1.25	1e+16	20	60	10.9563					1.06	3.76	1e+16	1.25	1e+16	20	60	1.64976					1.06	3.75	1e+16	1.25	1e+16	20	60	10.3055
		1.06	3.75	1e+16	1.25	1e+16	20	100	10.956					1.06	3.76	1e+16	1.25	1e+16	20	100	1.64975					1.06	3.75	1e+16	1.25	1e+16	20	100	10.3053
		1.06	3.75	1e+16	1.25	1e+16	60	20	13.4814					1.06	3.76	1e+16	1.25	1e+16	60	20	2.0511					1.06	3.75	1e+16	1.25	1e+16	60	20	12.6549
		1.06	3.75	1e+16	1.25	1e+16	60	60	13.4799					1.06	3.76	1e+16	1.25	1e+16	60	60	2.05102					1.06	3.75	1e+16	1.25	1e+16	60	60	12.6537
		1.06	3.75	1e+16	1.25	1e+16	60	100	13.4796					1.06	3.76	1e+16	1.25	1e+16	60	100	2.051					1.06	3.75	1e+16	1.25	1e+16	60	100	12.6534
		1.06	3.75	1e+16	1.25	1e+16	100	20	14.3623					1.06	3.76	1e+16	1.25	1e+16	100	20	2.20799					1.06	3.75	1e+16	1.25	1e+16	100	20	13.4781
		1.06	3.75	1e+16	1.25	1e+16	100	60	14.361					1.06	3.76	1e+16	1.25	1e+16	100	60	2.20792					1.06	3.75	1e+16	1.25	1e+16	100	60	13.477
		1.06	3.75	1e+16	1.25	1e+16	100	100	14.3608					1.06	3.76	1e+16	1.25	1e+16	100	100	2.20791					1.06	3.75	1e+16	1.25	1e+16	100	100	13.4768
		1.06	3.75	1e+16	1.5	10000000000000	20	20	23.9592					1.06	3.76	1e+16	1.5	10000000000000	20	20	14.5945					1.06	3.75	1e+16	1.5	10000000000000	20	20	23.0683
		1.06	3.75	1e+16	1.5	10000000000000	20	60	23.9626					1.06	3.76	1e+16	1.5	10000000000000	20	60	14.594					1.06	3.75	1e+16	1.5	10000000000000	20	60	23.0719
		1.06	3.75	1e+16	1.5	10000000000000	20	100	23.9633					1.06	3.76	1e+16	1.5	10000000000000	20	100	14.5939					1.06	3.75	1e+16	1.5	10000000000000	20	100	23.0727
		1.06	3.75	1e+16	1.5	10000000000000	60	20	24.0054					1.06	3.76	1e+16	1.5	10000000000000	60	20	14.7819					1.06	3.75	1e+16	1.5	10000000000000	60	20	23.1184
		1.06	3.75	1e+16	1.5	10000000000000	60	60	24.0089					1.06	3.76	1e+16	1.5	10000000000000	60	60	14.7815					1.06	3.75	1e+16	1.5	10000000000000	60	60	23.1221
		1.06	3.75	1e+16	1.5	10000000000000	60	100	24.0096					1.06	3.76	1e+16	1.5	10000000000000	60	100	14.7814					1.06	3.75	1e+16	1.5	10000000000000	60	100	23.1228
		1.06	3.75	1e+16	1.5	10000000000000	100	20	24.0147					1.06	3.76	1e+16	1.5	10000000000000	100	20	14.8208					1.06	3.75	1e+16	1.5	10000000000000	100	20	23.1285
		1.06	3.75	1e+16	1.5	10000000000000	100	60	24.0182					1.06	3.76	1e+16	1.5	10000000000000	100	60	14.8204					1.06	3.75	1e+16	1.5	10000000000000	100	60	23.1322
		1.06	3.75	1e+16	1.5	10000000000000	100	100	24.0189					1.06	3.76	1e+16	1.5	10000000000000	100	100	14.8203					1.06	3.75	1e+16	1.5	10000000000000	100	100	23.133
		1.06	3.75	1e+16	1.5	100000000000000	20	20	22.3969					1.06	3.76	1e+16	1.5	100000000000000	20	20	8.82124					1.06	3.75	1e+16	1.5	100000000000000	20	20	21.6933
		1.06	3.75	1e+16	1.5	100000000000000	20	60	22.3989					1.06	3.76	1e+16	1.5	100000000000000	20	60	8.82088					1.06	3.75	1e+16	1.5	100000000000000	20	60	21.6953
		1.06	3.75	1e+16	1.5	100000000000000	20	100	22.3993					1.06	3.76	1e+16	1.5	100000000000000	20	100	8.82081					1.06	3.75	1e+16	1.5	100000000000000	20	100	21.6957
		1.06	3.75	1e+16	1.5	100000000000000	60	20	22.7173					1.06	3.76	1e+16	1.5	100000000000000	60	20	9.32579					1.06	3.75	1e+16	1.5	100000000000000	60	20	22.0566
		1.06	3.75	1e+16	1.5	100000000000000	60	60	22.7198					1.06	3.76	1e+16	1.5	100000000000000	60	60	9.32578					1.06	3.75	1e+16	1.5	100000000000000	60	60	22.0591
		1.06	3.75	1e+16	1.5	100000000000000	60	100	22.7203					1.06	3.76	1e+16	1.5	100000000000000	60	100	9.32578					1.06	3.75	1e+16	1.5	100000000000000	60	100	22.0596
		1.06	3.75	1e+16	1.5	100000000000000	100	20	22.7837					1.06	3.76	1e+16	1.5	100000000000000	100	20	9.43732					1.06	3.75	1e+16	1.5	100000000000000	100	20	22.1324
		1.06	3.75	1e+16	1.5	100000000000000	100	60	22.7863					1.06	3.76	1e+16	1.5	100000000000000	100	60	9.4374					1.06	3.75	1e+16	1.5	100000000000000	100	60	22.1351
		1.06	3.75	1e+16	1.5	100000000000000	100	100	22.7868					1.06	3.76	1e+16	1.5	100000000000000	100	100	9.43741					1.06	3.75	1e+16	1.5	100000000000000	100	100	22.1356
		1.06	3.75	1e+16	1.5	1000000000000000	20	20	17.9296					1.06	3.76	1e+16	1.5	1000000000000000	20	20	4.2284					1.06	3.75	1e+16	1.5	1000000000000000	20	20	17.027
		1.06	3.75	1e+16	1.5	1000000000000000	20	60	17.9286					1.06	3.76	1e+16	1.5	1000000000000000	20	60	4.22789					1.06	3.75	1e+16	1.5	1000000000000000	20	60	17.0259
		1.06	3.75	1e+16	1.5	1000000000000000	20	100	17.9284					1.06	3.76	1e+16	1.5	1000000000000000	20	100	4.22778					1.06	3.75	1e+16	1.5	1000000000000000	20	100	17.0256
		1.06	3.75	1e+16	1.5	1000000000000000	60	20	19.3721					1.06	3.76	1e+16	1.5	1000000000000000	60	20	4.99427					1.06	3.75	1e+16	1.5	1000000000000000	60	20	18.5148
		1.06	3.75	1e+16	1.5	1000000000000000	60	60	19.3724					1.06	3.76	1e+16	1.5	1000000000000000	60	60	4.99404					1.06	3.75	1e+16	1.5	1000000000000000	60	60	18.5148
		1.06	3.75	1e+16	1.5	1000000000000000	60	100	19.3725					1.06	3.76	1e+16	1.5	1000000000000000	60	100	4.994					1.06	3.75	1e+16	1.5	1000000000000000	60	100	18.5148
		1.06	3.75	1e+16	1.5	1000000000000000	100	20	19.7166					1.06	3.76	1e+16	1.5	1000000000000000	100	20	5.20108					1.06	3.75	1e+16	1.5	1000000000000000	100	20	18.8758
		1.06	3.75	1e+16	1.5	1000000000000000	100	60	19.7173					1.06	3.76	1e+16	1.5	1000000000000000	100	60	5.20098					1.06	3.75	1e+16	1.5	1000000000000000	100	60	18.8762
		1.06	3.75	1e+16	1.5	1000000000000000	100	100	19.7175					1.06	3.76	1e+16	1.5	1000000000000000	100	100	5.20096					1.06	3.75	1e+16	1.5	1000000000000000	100	100	18.8763
		1.06	3.75	1e+16	1.5	1e+16	20	20	10.7329					1.06	3.76	1e+16	1.5	1e+16	20	20	1.60426					1.06	3.75	1e+16	1.5	1e+16	20	20	10.0995
		1.06	3.75	1e+16	1.5	1e+16	20	60	10.7316					1.06	3.76	1e+16	1.5	1e+16	20	60	1.6043					1.06	3.75	1e+16	1.5	1e+16	20	60	10.0985
		1.06	3.75	1e+16	1.5	1e+16	20	100	10.7314					1.06	3.76	1e+16	1.5	1e+16	20	100	1.60431					1.06	3.75	1e+16	1.5	1e+16	20	100	10.0983
		1.06	3.75	1e+16	1.5	1e+16	60	20	13.1059					1.06	3.76	1e+16	1.5	1e+16	60	20	1.93446					1.06	3.75	1e+16	1.5	1e+16	60	20	12.3045
		1.06	3.75	1e+16	1.5	1e+16	60	60	13.104					1.06	3.76	1e+16	1.5	1e+16	60	60	1.93442					1.06	3.75	1e+16	1.5	1e+16	60	60	12.303
		1.06	3.75	1e+16	1.5	1e+16	60	100	13.1037					1.06	3.76	1e+16	1.5	1e+16	60	100	1.93441					1.06	3.75	1e+16	1.5	1e+16	60	100	12.3026
		1.06	3.75	1e+16	1.5	1e+16	100	20	13.9867					1.06	3.76	1e+16	1.5	1e+16	100	20	2.06469					1.06	3.75	1e+16	1.5	1e+16	100	20	13.1241
		1.06	3.75	1e+16	1.5	1e+16	100	60	13.985					1.06	3.76	1e+16	1.5	1e+16	100	60	2.06464					1.06	3.75	1e+16	1.5	1e+16	100	60	13.1227
		1.06	3.75	1e+16	1.5	1e+16	100	100	13.9847					1.06	3.76	1e+16	1.5	1e+16	100	100	2.06463					1.06	3.75	1e+16	1.5	1e+16	100	100	13.1224
		1.06	3.75	1e+16	1.75	10000000000000	20	20	24.1139					1.06	3.76	1e+16	1.75	10000000000000	20	20	14.258					1.06	3.75	1e+16	1.75	10000000000000	20	20	23.2286
		1.06	3.75	1e+16	1.75	10000000000000	20	60	24.118					1.06	3.76	1e+16	1.75	10000000000000	20	60	14.2574					1.06	3.75	1e+16	1.75	10000000000000	20	60	23.233
		1.06	3.75	1e+16	1.75	10000000000000	20	100	24.1188					1.06	3.76	1e+16	1.75	10000000000000	20	100	14.2573					1.06	3.75	1e+16	1.75	10000000000000	20	100	23.2339
		1.06	3.75	1e+16	1.75	10000000000000	60	20	24.1684					1.06	3.76	1e+16	1.75	10000000000000	60	20	14.4574					1.06	3.75	1e+16	1.75	10000000000000	60	20	23.2878
		1.06	3.75	1e+16	1.75	10000000000000	60	60	24.1726					1.06	3.76	1e+16	1.75	10000000000000	60	60	14.4569					1.06	3.75	1e+16	1.75	10000000000000	60	60	23.2923
		1.06	3.75	1e+16	1.75	10000000000000	60	100	24.1735					1.06	3.76	1e+16	1.75	10000000000000	60	100	14.4568					1.06	3.75	1e+16	1.75	10000000000000	60	100	23.2933
		1.06	3.75	1e+16	1.75	10000000000000	100	20	24.1794					1.06	3.76	1e+16	1.75	10000000000000	100	20	14.4994					1.06	3.75	1e+16	1.75	10000000000000	100	20	23.2998
		1.06	3.75	1e+16	1.75	10000000000000	100	60	24.1837					1.06	3.76	1e+16	1.75	10000000000000	100	60	14.4989					1.06	3.75	1e+16	1.75	10000000000000	100	60	23.3044
		1.06	3.75	1e+16	1.75	10000000000000	100	100	24.1845					1.06	3.76	1e+16	1.75	10000000000000	100	100	14.4988					1.06	3.75	1e+16	1.75	10000000000000	100	100	23.3053
		1.06	3.75	1e+16	1.75	100000000000000	20	20	22.3807					1.06	3.76	1e+16	1.75	100000000000000	20	20	8.53698					1.06	3.75	1e+16	1.75	100000000000000	20	20	21.6691
		1.06	3.75	1e+16	1.75	100000000000000	20	60	22.383					1.06	3.76	1e+16	1.75	100000000000000	20	60	8.53648					1.06	3.75	1e+16	1.75	100000000000000	20	60	21.6712
		1.06	3.75	1e+16	1.75	100000000000000	20	100	22.3834					1.06	3.76	1e+16	1.75	100000000000000	20	100	8.53638					1.06	3.75	1e+16	1.75	100000000000000	20	100	21.6717
		1.06	3.75	1e+16	1.75	100000000000000	60	20	22.75					1.06	3.76	1e+16	1.75	100000000000000	60	20	9.07097					1.06	3.75	1e+16	1.75	100000000000000	60	20	22.0865
		1.06	3.75	1e+16	1.75	100000000000000	60	60	22.7528					1.06	3.76	1e+16	1.75	100000000000000	60	60	9.0709					1.06	3.75	1e+16	1.75	100000000000000	60	60	22.0894
		1.06	3.75	1e+16	1.75	100000000000000	60	100	22.7534					1.06	3.76	1e+16	1.75	100000000000000	60	100	9.07089					1.06	3.75	1e+16	1.75	100000000000000	60	100	22.09
		1.06	3.75	1e+16	1.75	100000000000000	100	20	22.8269					1.06	3.76	1e+16	1.75	100000000000000	100	20	9.19029					1.06	3.75	1e+16	1.75	100000000000000	100	20	22.1743
		1.06	3.75	1e+16	1.75	100000000000000	100	60	22.8299					1.06	3.76	1e+16	1.75	100000000000000	100	60	9.19034					1.06	3.75	1e+16	1.75	100000000000000	100	60	22.1773
		1.06	3.75	1e+16	1.75	100000000000000	100	100	22.8305					1.06	3.76	1e+16	1.75	100000000000000	100	100	9.19035					1.06	3.75	1e+16	1.75	100000000000000	100	100	22.1779
		1.06	3.75	1e+16	1.75	1000000000000000	20	20	17.6277					1.06	3.76	1e+16	1.75	1000000000000000	20	20	4.01726					1.06	3.75	1e+16	1.75	1000000000000000	20	20	16.712
		1.06	3.75	1e+16	1.75	1000000000000000	20	60	17.6262					1.06	3.76	1e+16	1.75	1000000000000000	20	60	4.01668					1.06	3.75	1e+16	1.75	1000000000000000	20	60	16.7104
		1.06	3.75	1e+16	1.75	1000000000000000	20	100	17.6259					1.06	3.76	1e+16	1.75	1000000000000000	20	100	4.01656					1.06	3.75	1e+16	1.75	1000000000000000	20	100	16.71
		1.06	3.75	1e+16	1.75	1000000000000000	60	20	19.1839					1.06	3.76	1e+16	1.75	1000000000000000	60	20	4.76557					1.06	3.75	1e+16	1.75	1000000000000000	60	20	18.2975
		1.06	3.75	1e+16	1.75	1000000000000000	60	60	19.184					1.06	3.76	1e+16	1.75	1000000000000000	60	60	4.76527					1.06	3.75	1e+16	1.75	1000000000000000	60	60	18.2973
		1.06	3.75	1e+16	1.75	1000000000000000	60	100	19.1841					1.06	3.76	1e+16	1.75	1000000000000000	60	100	4.76521					1.06	3.75	1e+16	1.75	1000000000000000	60	100	18.2973
		1.06	3.75	1e+16	1.75	1000000000000000	100	20	19.5677					1.06	3.76	1e+16	1.75	1000000000000000	100	20	4.97376					1.06	3.75	1e+16	1.75	1000000000000000	100	20	18.6945
		1.06	3.75	1e+16	1.75	1000000000000000	100	60	19.5684					1.06	3.76	1e+16	1.75	1000000000000000	100	60	4.97361					1.06	3.75	1e+16	1.75	1000000000000000	100	60	18.6948
		1.06	3.75	1e+16	1.75	1000000000000000	100	100	19.5686					1.06	3.76	1e+16	1.75	1000000000000000	100	100	4.97358					1.06	3.75	1e+16	1.75	1000000000000000	100	100	18.6949
		1.06	3.75	1e+16	1.75	1e+16	20	20	10.6073					1.06	3.76	1e+16	1.75	1e+16	20	20	1.58045					1.06	3.75	1e+16	1.75	1e+16	20	20	9.98375
		1.06	3.75	1e+16	1.75	1e+16	20	60	10.6062					1.06	3.76	1e+16	1.75	1e+16	20	60	1.58056					1.06	3.75	1e+16	1.75	1e+16	20	60	9.98292
		1.06	3.75	1e+16	1.75	1e+16	20	100	10.606					1.06	3.76	1e+16	1.75	1e+16	20	100	1.58059					1.06	3.75	1e+16	1.75	1e+16	20	100	9.98276
		1.06	3.75	1e+16	1.75	1e+16	60	20	12.816					1.06	3.76	1e+16	1.75	1e+16	60	20	1.85515					1.06	3.75	1e+16	1.75	1e+16	60	20	12.0343
		1.06	3.75	1e+16	1.75	1e+16	60	60	12.814					1.06	3.76	1e+16	1.75	1e+16	60	60	1.85517					1.06	3.75	1e+16	1.75	1e+16	60	60	12.0327
		1.06	3.75	1e+16	1.75	1e+16	60	100	12.8136					1.06	3.76	1e+16	1.75	1e+16	60	100	1.85517					1.06	3.75	1e+16	1.75	1e+16	60	100	12.0323
		1.06	3.75	1e+16	1.75	1e+16	100	20	13.6634					1.06	3.76	1e+16	1.75	1e+16	100	20	1.95974					1.06	3.75	1e+16	1.75	1e+16	100	20	12.8208
		1.06	3.75	1e+16	1.75	1e+16	100	60	13.6614					1.06	3.76	1e+16	1.75	1e+16	100	60	1.95973					1.06	3.75	1e+16	1.75	1e+16	100	60	12.8192
		1.06	3.75	1e+16	1.75	1e+16	100	100	13.661					1.06	3.76	1e+16	1.75	1e+16	100	100	1.95973					1.06	3.75	1e+16	1.75	1e+16	100	100	12.8188
		1.06	3.75	1e+17	0.75	10000000000000	20	20	22.231					1.06	3.76	1e+17	0.75	10000000000000	20	20	17.2466					1.06	3.75	1e+17	0.75	10000000000000	20	20	21.3295
		1.06	3.75	1e+17	0.75	10000000000000	20	60	22.2311					1.06	3.76	1e+17	0.75	10000000000000	20	60	17.2466					1.06	3.75	1e+17	0.75	10000000000000	20	60	21.3297
		1.06	3.75	1e+17	0.75	10000000000000	20	100	22.2312					1.06	3.76	1e+17	0.75	10000000000000	20	100	17.2466					1.06	3.75	1e+17	0.75	10000000000000	20	100	21.3297
		1.06	3.75	1e+17	0.75	10000000000000	60	20	22.2405					1.06	3.76	1e+17	0.75	10000000000000	60	20	17.3663					1.06	3.75	1e+17	0.75	10000000000000	60	20	21.3388
		1.06	3.75	1e+17	0.75	10000000000000	60	60	22.2406					1.06	3.76	1e+17	0.75	10000000000000	60	60	17.3662					1.06	3.75	1e+17	0.75	10000000000000	60	60	21.3389
		1.06	3.75	1e+17	0.75	10000000000000	60	100	22.2407					1.06	3.76	1e+17	0.75	10000000000000	60	100	17.3662					1.06	3.75	1e+17	0.75	10000000000000	60	100	21.339
		1.06	3.75	1e+17	0.75	10000000000000	100	20	22.2424					1.06	3.76	1e+17	0.75	10000000000000	100	20	17.3898					1.06	3.75	1e+17	0.75	10000000000000	100	20	21.3406
		1.06	3.75	1e+17	0.75	10000000000000	100	60	22.2426					1.06	3.76	1e+17	0.75	10000000000000	100	60	17.3898					1.06	3.75	1e+17	0.75	10000000000000	100	60	21.3408
		1.06	3.75	1e+17	0.75	10000000000000	100	100	22.2426					1.06	3.76	1e+17	0.75	10000000000000	100	100	17.3897					1.06	3.75	1e+17	0.75	10000000000000	100	100	21.3408
		1.06	3.75	1e+17	0.75	100000000000000	20	20	22.0405					1.06	3.76	1e+17	0.75	100000000000000	20	20	13.6532					1.06	3.75	1e+17	0.75	100000000000000	20	20	21.1965
		1.06	3.75	1e+17	0.75	100000000000000	20	60	22.0407					1.06	3.76	1e+17	0.75	100000000000000	20	60	13.6531					1.06	3.75	1e+17	0.75	100000000000000	20	60	21.1967
		1.06	3.75	1e+17	0.75	100000000000000	20	100	22.0407					1.06	3.76	1e+17	0.75	100000000000000	20	100	13.6531					1.06	3.75	1e+17	0.75	100000000000000	20	100	21.1967
		1.06	3.75	1e+17	0.75	100000000000000	60	20	22.0963					1.06	3.76	1e+17	0.75	100000000000000	60	20	13.8697					1.06	3.75	1e+17	0.75	100000000000000	60	20	21.2516
		1.06	3.75	1e+17	0.75	100000000000000	60	60	22.0964					1.06	3.76	1e+17	0.75	100000000000000	60	60	13.8697					1.06	3.75	1e+17	0.75	100000000000000	60	60	21.2517
		1.06	3.75	1e+17	0.75	100000000000000	60	100	22.0964					1.06	3.76	1e+17	0.75	100000000000000	60	100	13.8697					1.06	3.75	1e+17	0.75	100000000000000	60	100	21.2517
		1.06	3.75	1e+17	0.75	100000000000000	100	20	22.1075					1.06	3.76	1e+17	0.75	100000000000000	100	20	13.9145					1.06	3.75	1e+17	0.75	100000000000000	100	20	21.2626
		1.06	3.75	1e+17	0.75	100000000000000	100	60	22.1076					1.06	3.76	1e+17	0.75	100000000000000	100	60	13.9145					1.06	3.75	1e+17	0.75	100000000000000	100	60	21.2628
		1.06	3.75	1e+17	0.75	100000000000000	100	100	22.1076					1.06	3.76	1e+17	0.75	100000000000000	100	100	13.9145					1.06	3.75	1e+17	0.75	100000000000000	100	100	21.2628
		1.06	3.75	1e+17	0.75	1000000000000000	20	20	20.7593					1.06	3.76	1e+17	0.75	1000000000000000	20	20	9.14518					1.06	3.75	1e+17	0.75	1000000000000000	20	20	20.1172
		1.06	3.75	1e+17	0.75	1000000000000000	20	60	20.7594					1.06	3.76	1e+17	0.75	1000000000000000	20	60	9.14517					1.06	3.75	1e+17	0.75	1000000000000000	20	60	20.1173
		1.06	3.75	1e+17	0.75	1000000000000000	20	100	20.7594					1.06	3.76	1e+17	0.75	1000000000000000	20	100	9.14517					1.06	3.75	1e+17	0.75	1000000000000000	20	100	20.1173
		1.06	3.75	1e+17	0.75	1000000000000000	60	20	21.1836					1.06	3.76	1e+17	0.75	1000000000000000	60	20	9.62179					1.06	3.75	1e+17	0.75	1000000000000000	60	20	20.5499
		1.06	3.75	1e+17	0.75	1000000000000000	60	60	21.1837					1.06	3.76	1e+17	0.75	1000000000000000	60	60	9.62179					1.06	3.75	1e+17	0.75	1000000000000000	60	60	20.55
		1.06	3.75	1e+17	0.75	1000000000000000	60	100	21.1838					1.06	3.76	1e+17	0.75	1000000000000000	60	100	9.6218					1.06	3.75	1e+17	0.75	1000000000000000	60	100	20.55
		1.06	3.75	1e+17	0.75	1000000000000000	100	20	21.272					1.06	3.76	1e+17	0.75	1000000000000000	100	20	9.7252					1.06	3.75	1e+17	0.75	1000000000000000	100	20	20.6404
		1.06	3.75	1e+17	0.75	1000000000000000	100	60	21.2721					1.06	3.76	1e+17	0.75	1000000000000000	100	60	9.72521					1.06	3.75	1e+17	0.75	1000000000000000	100	60	20.6405
		1.06	3.75	1e+17	0.75	1000000000000000	100	100	21.2721					1.06	3.76	1e+17	0.75	1000000000000000	100	100	9.72521					1.06	3.75	1e+17	0.75	1000000000000000	100	100	20.6405
		1.06	3.75	1e+17	0.75	1e+16	20	20	15.8695					1.06	3.76	1e+17	0.75	1e+16	20	20	4.70965					1.06	3.75	1e+17	0.75	1e+16	20	20	15.3124
		1.06	3.75	1e+17	0.75	1e+16	20	60	15.8695					1.06	3.76	1e+17	0.75	1e+16	20	60	4.70963					1.06	3.75	1e+17	0.75	1e+16	20	60	15.3123
		1.06	3.75	1e+17	0.75	1e+16	20	100	15.8695					1.06	3.76	1e+17	0.75	1e+16	20	100	4.70963					1.06	3.75	1e+17	0.75	1e+16	20	100	15.3123
		1.06	3.75	1e+17	0.75	1e+16	60	20	17.9208					1.06	3.76	1e+17	0.75	1e+16	60	20	5.51076					1.06	3.75	1e+17	0.75	1e+16	60	20	17.3173
		1.06	3.75	1e+17	0.75	1e+16	60	60	17.9208					1.06	3.76	1e+17	0.75	1e+16	60	60	5.51076					1.06	3.75	1e+17	0.75	1e+16	60	60	17.3173
		1.06	3.75	1e+17	0.75	1e+16	60	100	17.9208					1.06	3.76	1e+17	0.75	1e+16	60	100	5.51076					1.06	3.75	1e+17	0.75	1e+16	60	100	17.3173
		1.06	3.75	1e+17	0.75	1e+16	100	20	18.4597					1.06	3.76	1e+17	0.75	1e+16	100	20	5.73106					1.06	3.75	1e+17	0.75	1e+16	100	20	17.8462
		1.06	3.75	1e+17	0.75	1e+16	100	60	18.4598					1.06	3.76	1e+17	0.75	1e+16	100	60	5.73106					1.06	3.75	1e+17	0.75	1e+16	100	60	17.8462
		1.06	3.75	1e+17	0.75	1e+16	100	100	18.4598					1.06	3.76	1e+17	0.75	1e+16	100	100	5.73106					1.06	3.75	1e+17	0.75	1e+16	100	100	17.8462
		1.06	3.75	1e+17	1	10000000000000	20	20	23.3437					1.06	3.76	1e+17	1	10000000000000	20	20	17.7212					1.06	3.75	1e+17	1	10000000000000	20	20	22.3862
		1.06	3.75	1e+17	1	10000000000000	20	60	23.344					1.06	3.76	1e+17	1	10000000000000	20	60	17.7211					1.06	3.75	1e+17	1	10000000000000	20	60	22.3864
		1.06	3.75	1e+17	1	10000000000000	20	100	23.344					1.06	3.76	1e+17	1	10000000000000	20	100	17.721					1.06	3.75	1e+17	1	10000000000000	20	100	22.3865
		1.06	3.75	1e+17	1	10000000000000	60	20	23.357					1.06	3.76	1e+17	1	10000000000000	60	20	17.8525					1.06	3.75	1e+17	1	10000000000000	60	20	22.3991
		1.06	3.75	1e+17	1	10000000000000	60	60	23.3573					1.06	3.76	1e+17	1	10000000000000	60	60	17.8524					1.06	3.75	1e+17	1	10000000000000	60	60	22.3993
		1.06	3.75	1e+17	1	10000000000000	60	100	23.3573					1.06	3.76	1e+17	1	10000000000000	60	100	17.8524					1.06	3.75	1e+17	1	10000000000000	60	100	22.3994
		1.06	3.75	1e+17	1	10000000000000	100	20	23.3597					1.06	3.76	1e+17	1	10000000000000	100	20	17.8792					1.06	3.75	1e+17	1	10000000000000	100	20	22.4017
		1.06	3.75	1e+17	1	10000000000000	100	60	23.3599					1.06	3.76	1e+17	1	10000000000000	100	60	17.8792					1.06	3.75	1e+17	1	10000000000000	100	60	22.4019
		1.06	3.75	1e+17	1	10000000000000	100	100	23.36					1.06	3.76	1e+17	1	10000000000000	100	100	17.8791					1.06	3.75	1e+17	1	10000000000000	100	100	22.4019
		1.06	3.75	1e+17	1	100000000000000	20	20	23.0648					1.06	3.76	1e+17	1	100000000000000	20	20	13.6783					1.06	3.75	1e+17	1	100000000000000	20	20	22.1867
		1.06	3.75	1e+17	1	100000000000000	20	60	23.065					1.06	3.76	1e+17	1	100000000000000	20	60	13.6783					1.06	3.75	1e+17	1	100000000000000	20	60	22.1869
		1.06	3.75	1e+17	1	100000000000000	20	100	23.0651					1.06	3.76	1e+17	1	100000000000000	20	100	13.6783					1.06	3.75	1e+17	1	100000000000000	20	100	22.1869
		1.06	3.75	1e+17	1	100000000000000	60	20	23.1499					1.06	3.76	1e+17	1	100000000000000	60	20	13.9259					1.06	3.75	1e+17	1	100000000000000	60	20	22.2709
		1.06	3.75	1e+17	1	100000000000000	60	60	23.1501					1.06	3.76	1e+17	1	100000000000000	60	60	13.9259					1.06	3.75	1e+17	1	100000000000000	60	60	22.2711
		1.06	3.75	1e+17	1	100000000000000	60	100	23.1502					1.06	3.76	1e+17	1	100000000000000	60	100	13.9259					1.06	3.75	1e+17	1	100000000000000	60	100	22.2712
		1.06	3.75	1e+17	1	100000000000000	100	20	23.1671					1.06	3.76	1e+17	1	100000000000000	100	20	13.978					1.06	3.75	1e+17	1	100000000000000	100	20	22.2879
		1.06	3.75	1e+17	1	100000000000000	100	60	23.1673					1.06	3.76	1e+17	1	100000000000000	100	60	13.978					1.06	3.75	1e+17	1	100000000000000	100	60	22.2881
		1.06	3.75	1e+17	1	100000000000000	100	100	23.1673					1.06	3.76	1e+17	1	100000000000000	100	100	13.978					1.06	3.75	1e+17	1	100000000000000	100	100	22.2881
		1.06	3.75	1e+17	1	1000000000000000	20	20	21.3184					1.06	3.76	1e+17	1	1000000000000000	20	20	8.93507					1.06	3.75	1e+17	1	1000000000000000	20	20	20.6619
		1.06	3.75	1e+17	1	1000000000000000	20	60	21.3185					1.06	3.76	1e+17	1	1000000000000000	20	60	8.93505					1.06	3.75	1e+17	1	1000000000000000	20	60	20.662
		1.06	3.75	1e+17	1	1000000000000000	20	100	21.3185					1.06	3.76	1e+17	1	1000000000000000	20	100	8.93505					1.06	3.75	1e+17	1	1000000000000000	20	100	20.6621
		1.06	3.75	1e+17	1	1000000000000000	60	20	21.9419					1.06	3.76	1e+17	1	1000000000000000	60	20	9.48931					1.06	3.75	1e+17	1	1000000000000000	60	20	21.2961
		1.06	3.75	1e+17	1	1000000000000000	60	60	21.9421					1.06	3.76	1e+17	1	1000000000000000	60	60	9.48931					1.06	3.75	1e+17	1	1000000000000000	60	60	21.2963
		1.06	3.75	1e+17	1	1000000000000000	60	100	21.9421					1.06	3.76	1e+17	1	1000000000000000	60	100	9.48931					1.06	3.75	1e+17	1	1000000000000000	60	100	21.2963
		1.06	3.75	1e+17	1	1000000000000000	100	20	22.0749					1.06	3.76	1e+17	1	1000000000000000	100	20	9.61224					1.06	3.75	1e+17	1	1000000000000000	100	20	21.4319
		1.06	3.75	1e+17	1	1000000000000000	100	60	22.0751					1.06	3.76	1e+17	1	1000000000000000	100	60	9.61225					1.06	3.75	1e+17	1	1000000000000000	100	60	21.432
		1.06	3.75	1e+17	1	1000000000000000	100	100	22.0751					1.06	3.76	1e+17	1	1000000000000000	100	100	9.61226					1.06	3.75	1e+17	1	1000000000000000	100	100	21.4321
		1.06	3.75	1e+17	1	1e+16	20	20	15.504					1.06	3.76	1e+17	1	1e+16	20	20	4.46589					1.06	3.75	1e+17	1	1e+16	20	20	14.946
		1.06	3.75	1e+17	1	1e+16	20	60	15.5039					1.06	3.76	1e+17	1	1e+16	20	60	4.46587					1.06	3.75	1e+17	1	1e+16	20	60	14.9459
		1.06	3.75	1e+17	1	1e+16	20	100	15.5039					1.06	3.76	1e+17	1	1e+16	20	100	4.46587					1.06	3.75	1e+17	1	1e+16	20	100	14.9458
		1.06	3.75	1e+17	1	1e+16	60	20	17.8992					1.06	3.76	1e+17	1	1e+16	60	20	5.24219					1.06	3.75	1e+17	1	1e+16	60	20	17.2567
		1.06	3.75	1e+17	1	1e+16	60	60	17.8991					1.06	3.76	1e+17	1	1e+16	60	60	5.24218					1.06	3.75	1e+17	1	1e+16	60	60	17.2567
		1.06	3.75	1e+17	1	1e+16	60	100	17.8991					1.06	3.76	1e+17	1	1e+16	60	100	5.24217					1.06	3.75	1e+17	1	1e+16	60	100	17.2567
		1.06	3.75	1e+17	1	1e+16	100	20	18.6102					1.06	3.76	1e+17	1	1e+16	100	20	5.47618					1.06	3.75	1e+17	1	1e+16	100	20	17.9428
		1.06	3.75	1e+17	1	1e+16	100	60	18.6102					1.06	3.76	1e+17	1	1e+16	100	60	5.47617					1.06	3.75	1e+17	1	1e+16	100	60	17.9428
		1.06	3.75	1e+17	1	1e+16	100	100	18.6102					1.06	3.76	1e+17	1	1e+16	100	100	5.47617					1.06	3.75	1e+17	1	1e+16	100	100	17.9428
		1.06	3.75	1e+17	1.25	10000000000000	20	20	23.9282					1.06	3.76	1e+17	1.25	10000000000000	20	20	17.838					1.06	3.75	1e+17	1.25	10000000000000	20	20	22.9436
		1.06	3.75	1e+17	1.25	10000000000000	20	60	23.9285					1.06	3.76	1e+17	1.25	10000000000000	20	60	17.8379					1.06	3.75	1e+17	1.25	10000000000000	20	60	22.9439
		1.06	3.75	1e+17	1.25	10000000000000	20	100	23.9286					1.06	3.76	1e+17	1.25	10000000000000	20	100	17.8378					1.06	3.75	1e+17	1.25	10000000000000	20	100	22.944
		1.06	3.75	1e+17	1.25	10000000000000	60	20	23.9452					1.06	3.76	1e+17	1.25	10000000000000	60	20	17.981					1.06	3.75	1e+17	1.25	10000000000000	60	20	22.96
		1.06	3.75	1e+17	1.25	10000000000000	60	60	23.9455					1.06	3.76	1e+17	1.25	10000000000000	60	60	17.9808					1.06	3.75	1e+17	1.25	10000000000000	60	60	22.9604
		1.06	3.75	1e+17	1.25	10000000000000	60	100	23.9456					1.06	3.76	1e+17	1.25	10000000000000	60	100	17.9808					1.06	3.75	1e+17	1.25	10000000000000	60	100	22.9604
		1.06	3.75	1e+17	1.25	10000000000000	100	20	23.9486					1.06	3.76	1e+17	1.25	10000000000000	100	20	18.0102					1.06	3.75	1e+17	1.25	10000000000000	100	20	22.9633
		1.06	3.75	1e+17	1.25	10000000000000	100	60	23.9489					1.06	3.76	1e+17	1.25	10000000000000	100	60	18.01					1.06	3.75	1e+17	1.25	10000000000000	100	60	22.9637
		1.06	3.75	1e+17	1.25	10000000000000	100	100	23.949					1.06	3.76	1e+17	1.25	10000000000000	100	100	18.01					1.06	3.75	1e+17	1.25	10000000000000	100	100	22.9637
		1.06	3.75	1e+17	1.25	100000000000000	20	20	23.5638					1.06	3.76	1e+17	1.25	100000000000000	20	20	13.5162					1.06	3.75	1e+17	1.25	100000000000000	20	20	22.6774
		1.06	3.75	1e+17	1.25	100000000000000	20	60	23.5641					1.06	3.76	1e+17	1.25	100000000000000	20	60	13.5161					1.06	3.75	1e+17	1.25	100000000000000	20	60	22.6777
		1.06	3.75	1e+17	1.25	100000000000000	20	100	23.5641					1.06	3.76	1e+17	1.25	100000000000000	20	100	13.5161					1.06	3.75	1e+17	1.25	100000000000000	20	100	22.6778
		1.06	3.75	1e+17	1.25	100000000000000	60	20	23.6788					1.06	3.76	1e+17	1.25	100000000000000	60	20	13.7949					1.06	3.75	1e+17	1.25	100000000000000	60	20	22.7915
		1.06	3.75	1e+17	1.25	100000000000000	60	60	23.6791					1.06	3.76	1e+17	1.25	100000000000000	60	60	13.7949					1.06	3.75	1e+17	1.25	100000000000000	60	60	22.7918
		1.06	3.75	1e+17	1.25	100000000000000	60	100	23.6791					1.06	3.76	1e+17	1.25	100000000000000	60	100	13.7949					1.06	3.75	1e+17	1.25	100000000000000	60	100	22.7918
		1.06	3.75	1e+17	1.25	100000000000000	100	20	23.7021					1.06	3.76	1e+17	1.25	100000000000000	100	20	13.8529					1.06	3.75	1e+17	1.25	100000000000000	100	20	22.8146
		1.06	3.75	1e+17	1.25	100000000000000	100	60	23.7024					1.06	3.76	1e+17	1.25	100000000000000	100	60	13.8529					1.06	3.75	1e+17	1.25	100000000000000	100	60	22.8149
		1.06	3.75	1e+17	1.25	100000000000000	100	100	23.7024					1.06	3.76	1e+17	1.25	100000000000000	100	100	13.8529					1.06	3.75	1e+17	1.25	100000000000000	100	100	22.8149
		1.06	3.75	1e+17	1.25	1000000000000000	20	20	21.4164					1.06	3.76	1e+17	1.25	1000000000000000	20	20	8.65566					1.06	3.75	1e+17	1.25	1000000000000000	20	20	20.7578
		1.06	3.75	1e+17	1.25	1000000000000000	20	60	21.4165					1.06	3.76	1e+17	1.25	1000000000000000	20	60	8.65562					1.06	3.75	1e+17	1.25	1000000000000000	20	60	20.7579
		1.06	3.75	1e+17	1.25	1000000000000000	20	100	21.4165					1.06	3.76	1e+17	1.25	1000000000000000	20	100	8.65561					1.06	3.75	1e+17	1.25	1000000000000000	20	100	20.7579
		1.06	3.75	1e+17	1.25	1000000000000000	60	20	22.2186					1.06	3.76	1e+17	1.25	1000000000000000	60	20	9.25957					1.06	3.75	1e+17	1.25	1000000000000000	60	20	21.5703
		1.06	3.75	1e+17	1.25	1000000000000000	60	60	22.2188					1.06	3.76	1e+17	1.25	1000000000000000	60	60	9.25957					1.06	3.75	1e+17	1.25	1000000000000000	60	60	21.5705
		1.06	3.75	1e+17	1.25	1000000000000000	60	100	22.2188					1.06	3.76	1e+17	1.25	1000000000000000	60	100	9.25957					1.06	3.75	1e+17	1.25	1000000000000000	60	100	21.5705
		1.06	3.75	1e+17	1.25	1000000000000000	100	20	22.3946					1.06	3.76	1e+17	1.25	1000000000000000	100	20	9.3973					1.06	3.75	1e+17	1.25	1000000000000000	100	20	21.7492
		1.06	3.75	1e+17	1.25	1000000000000000	100	60	22.3948					1.06	3.76	1e+17	1.25	1000000000000000	100	60	9.39731					1.06	3.75	1e+17	1.25	1000000000000000	100	60	21.7494
		1.06	3.75	1e+17	1.25	1000000000000000	100	100	22.3948					1.06	3.76	1e+17	1.25	1000000000000000	100	100	9.39731					1.06	3.75	1e+17	1.25	1000000000000000	100	100	21.7495
		1.06	3.75	1e+17	1.25	1e+16	20	20	15.1663					1.06	3.76	1e+17	1.25	1e+16	20	20	4.30757					1.06	3.75	1e+17	1.25	1e+16	20	20	14.6172
		1.06	3.75	1e+17	1.25	1e+16	20	60	15.1662					1.06	3.76	1e+17	1.25	1e+16	20	60	4.30756					1.06	3.75	1e+17	1.25	1e+16	20	60	14.6171
		1.06	3.75	1e+17	1.25	1e+16	20	100	15.1662					1.06	3.76	1e+17	1.25	1e+16	20	100	4.30756					1.06	3.75	1e+17	1.25	1e+16	20	100	14.6171
		1.06	3.75	1e+17	1.25	1e+16	60	20	17.6233					1.06	3.76	1e+17	1.25	1e+16	60	20	5.0045					1.06	3.75	1e+17	1.25	1e+16	60	20	16.9715
		1.06	3.75	1e+17	1.25	1e+16	60	60	17.6233					1.06	3.76	1e+17	1.25	1e+16	60	60	5.00449					1.06	3.75	1e+17	1.25	1e+16	60	60	16.9714
		1.06	3.75	1e+17	1.25	1e+16	60	100	17.6232					1.06	3.76	1e+17	1.25	1e+16	60	100	5.00448					1.06	3.75	1e+17	1.25	1e+16	60	100	16.9714
		1.06	3.75	1e+17	1.25	1e+16	100	20	18.4344					1.06	3.76	1e+17	1.25	1e+16	100	20	5.22921					1.06	3.75	1e+17	1.25	1e+16	100	20	17.745
		1.06	3.75	1e+17	1.25	1e+16	100	60	18.4344					1.06	3.76	1e+17	1.25	1e+16	100	60	5.2292					1.06	3.75	1e+17	1.25	1e+16	100	60	17.745
		1.06	3.75	1e+17	1.25	1e+16	100	100	18.4344					1.06	3.76	1e+17	1.25	1e+16	100	100	5.2292					1.06	3.75	1e+17	1.25	1e+16	100	100	17.745
		1.06	3.75	1e+17	1.5	10000000000000	20	20	24.2606					1.06	3.76	1e+17	1.5	10000000000000	20	20	17.8005					1.06	3.75	1e+17	1.5	10000000000000	20	20	23.2619
		1.06	3.75	1e+17	1.5	10000000000000	20	60	24.261					1.06	3.76	1e+17	1.5	10000000000000	20	60	17.8003					1.06	3.75	1e+17	1.5	10000000000000	20	60	23.2623
		1.06	3.75	1e+17	1.5	10000000000000	20	100	24.261					1.06	3.76	1e+17	1.5	10000000000000	20	100	17.8003					1.06	3.75	1e+17	1.5	10000000000000	20	100	23.2624
		1.06	3.75	1e+17	1.5	10000000000000	60	20	24.2812					1.06	3.76	1e+17	1.5	10000000000000	60	20	17.9526					1.06	3.75	1e+17	1.5	10000000000000	60	20	23.2788
		1.06	3.75	1e+17	1.5	10000000000000	60	60	24.2816					1.06	3.76	1e+17	1.5	10000000000000	60	60	17.9525					1.06	3.75	1e+17	1.5	10000000000000	60	60	23.2793
		1.06	3.75	1e+17	1.5	10000000000000	60	100	24.2817					1.06	3.76	1e+17	1.5	10000000000000	60	100	17.9525					1.06	3.75	1e+17	1.5	10000000000000	60	100	23.2793
		1.06	3.75	1e+17	1.5	10000000000000	100	20	24.2853					1.06	3.76	1e+17	1.5	10000000000000	100	20	17.9838					1.06	3.75	1e+17	1.5	10000000000000	100	20	23.2829
		1.06	3.75	1e+17	1.5	10000000000000	100	60	24.2857					1.06	3.76	1e+17	1.5	10000000000000	100	60	17.9836					1.06	3.75	1e+17	1.5	10000000000000	100	60	23.2833
		1.06	3.75	1e+17	1.5	10000000000000	100	100	24.2858					1.06	3.76	1e+17	1.5	10000000000000	100	100	17.9836					1.06	3.75	1e+17	1.5	10000000000000	100	100	23.2834
		1.06	3.75	1e+17	1.5	100000000000000	20	20	23.8132					1.06	3.76	1e+17	1.5	100000000000000	20	20	13.299					1.06	3.75	1e+17	1.5	100000000000000	20	20	22.9301
		1.06	3.75	1e+17	1.5	100000000000000	20	60	23.8136					1.06	3.76	1e+17	1.5	100000000000000	20	60	13.299					1.06	3.75	1e+17	1.5	100000000000000	20	60	22.9305
		1.06	3.75	1e+17	1.5	100000000000000	20	100	23.8136					1.06	3.76	1e+17	1.5	100000000000000	20	100	13.299					1.06	3.75	1e+17	1.5	100000000000000	20	100	22.9306
		1.06	3.75	1e+17	1.5	100000000000000	60	20	23.9589					1.06	3.76	1e+17	1.5	100000000000000	60	20	13.597					1.06	3.75	1e+17	1.5	100000000000000	60	20	23.0738
		1.06	3.75	1e+17	1.5	100000000000000	60	60	23.9593					1.06	3.76	1e+17	1.5	100000000000000	60	60	13.597					1.06	3.75	1e+17	1.5	100000000000000	60	60	23.0742
		1.06	3.75	1e+17	1.5	100000000000000	60	100	23.9594					1.06	3.76	1e+17	1.5	100000000000000	60	100	13.597					1.06	3.75	1e+17	1.5	100000000000000	60	100	23.0743
		1.06	3.75	1e+17	1.5	100000000000000	100	20	23.9883					1.06	3.76	1e+17	1.5	100000000000000	100	20	13.6598					1.06	3.75	1e+17	1.5	100000000000000	100	20	23.1031
		1.06	3.75	1e+17	1.5	100000000000000	100	60	23.9887					1.06	3.76	1e+17	1.5	100000000000000	100	60	13.6598					1.06	3.75	1e+17	1.5	100000000000000	100	60	23.1035
		1.06	3.75	1e+17	1.5	100000000000000	100	100	23.9888					1.06	3.76	1e+17	1.5	100000000000000	100	100	13.6598					1.06	3.75	1e+17	1.5	100000000000000	100	100	23.1035
		1.06	3.75	1e+17	1.5	1000000000000000	20	20	21.3271					1.06	3.76	1e+17	1.5	1000000000000000	20	20	8.38848					1.06	3.75	1e+17	1.5	1000000000000000	20	20	20.6703
		1.06	3.75	1e+17	1.5	1000000000000000	20	60	21.3272					1.06	3.76	1e+17	1.5	1000000000000000	20	60	8.38844					1.06	3.75	1e+17	1.5	1000000000000000	20	60	20.6704
		1.06	3.75	1e+17	1.5	1000000000000000	20	100	21.3272					1.06	3.76	1e+17	1.5	1000000000000000	20	100	8.38843					1.06	3.75	1e+17	1.5	1000000000000000	20	100	20.6704
		1.06	3.75	1e+17	1.5	1000000000000000	60	20	22.2801					1.06	3.76	1e+17	1.5	1000000000000000	60	20	9.01929					1.06	3.75	1e+17	1.5	1000000000000000	60	20	21.6319
		1.06	3.75	1e+17	1.5	1000000000000000	60	60	22.2803					1.06	3.76	1e+17	1.5	1000000000000000	60	60	9.01928					1.06	3.75	1e+17	1.5	1000000000000000	60	60	21.6321
		1.06	3.75	1e+17	1.5	1000000000000000	60	100	22.2803					1.06	3.76	1e+17	1.5	1000000000000000	60	100	9.01928					1.06	3.75	1e+17	1.5	1000000000000000	60	100	21.6322
		1.06	3.75	1e+17	1.5	1000000000000000	100	20	22.4959					1.06	3.76	1e+17	1.5	1000000000000000	100	20	9.16721					1.06	3.75	1e+17	1.5	1000000000000000	100	20	21.8504
		1.06	3.75	1e+17	1.5	1000000000000000	100	60	22.4961					1.06	3.76	1e+17	1.5	1000000000000000	100	60	9.16722					1.06	3.75	1e+17	1.5	1000000000000000	100	60	21.8506
		1.06	3.75	1e+17	1.5	1000000000000000	100	100	22.4961					1.06	3.76	1e+17	1.5	1000000000000000	100	100	9.16722					1.06	3.75	1e+17	1.5	1000000000000000	100	100	21.8507
		1.06	3.75	1e+17	1.5	1e+16	20	20	14.9415					1.06	3.76	1e+17	1.5	1e+16	20	20	4.21632					1.06	3.75	1e+17	1.5	1e+16	20	20	14.4027
		1.06	3.75	1e+17	1.5	1e+16	20	60	14.9414					1.06	3.76	1e+17	1.5	1e+16	20	60	4.21633					1.06	3.75	1e+17	1.5	1e+16	20	60	14.4026
		1.06	3.75	1e+17	1.5	1e+16	20	100	14.9413					1.06	3.76	1e+17	1.5	1e+16	20	100	4.21633					1.06	3.75	1e+17	1.5	1e+16	20	100	14.4026
		1.06	3.75	1e+17	1.5	1e+16	60	20	17.3238					1.06	3.76	1e+17	1.5	1e+16	60	20	4.82126					1.06	3.75	1e+17	1.5	1e+16	60	20	16.6705
		1.06	3.75	1e+17	1.5	1e+16	60	60	17.3237					1.06	3.76	1e+17	1.5	1e+16	60	60	4.82126					1.06	3.75	1e+17	1.5	1e+16	60	60	16.6704
		1.06	3.75	1e+17	1.5	1e+16	60	100	17.3237					1.06	3.76	1e+17	1.5	1e+16	60	100	4.82126					1.06	3.75	1e+17	1.5	1e+16	60	100	16.6704
		1.06	3.75	1e+17	1.5	1e+16	100	20	18.174					1.06	3.76	1e+17	1.5	1e+16	100	20	5.02668					1.06	3.75	1e+17	1.5	1e+16	100	20	17.474
		1.06	3.75	1e+17	1.5	1e+16	100	60	18.1739					1.06	3.76	1e+17	1.5	1e+16	100	60	5.02668					1.06	3.75	1e+17	1.5	1e+16	100	60	17.4739
		1.06	3.75	1e+17	1.5	1e+16	100	100	18.1739					1.06	3.76	1e+17	1.5	1e+16	100	100	5.02667					1.06	3.75	1e+17	1.5	1e+16	100	100	17.4739
		1.06	3.75	1e+17	1.75	10000000000000	20	20	24.4619					1.06	3.76	1e+17	1.75	10000000000000	20	20	17.6956					1.06	3.75	1e+17	1.75	10000000000000	20	20	23.4528
		1.06	3.75	1e+17	1.75	10000000000000	20	60	24.4624					1.06	3.76	1e+17	1.75	10000000000000	20	60	17.6954					1.06	3.75	1e+17	1.75	10000000000000	20	60	23.4533
		1.06	3.75	1e+17	1.75	10000000000000	20	100	24.4625					1.06	3.76	1e+17	1.75	10000000000000	20	100	17.6954					1.06	3.75	1e+17	1.75	10000000000000	20	100	23.4534
		1.06	3.75	1e+17	1.75	10000000000000	60	20	24.4861					1.06	3.76	1e+17	1.75	10000000000000	60	20	17.8555					1.06	3.75	1e+17	1.75	10000000000000	60	20	23.4763
		1.06	3.75	1e+17	1.75	10000000000000	60	60	24.4866					1.06	3.76	1e+17	1.75	10000000000000	60	60	17.8553					1.06	3.75	1e+17	1.75	10000000000000	60	60	23.4768
		1.06	3.75	1e+17	1.75	10000000000000	60	100	24.4867					1.06	3.76	1e+17	1.75	10000000000000	60	100	17.8553					1.06	3.75	1e+17	1.75	10000000000000	60	100	23.4769
		1.06	3.75	1e+17	1.75	10000000000000	100	20	24.491					1.06	3.76	1e+17	1.75	10000000000000	100	20	17.8882					1.06	3.75	1e+17	1.75	10000000000000	100	20	23.481
		1.06	3.75	1e+17	1.75	10000000000000	100	60	24.4915					1.06	3.76	1e+17	1.75	10000000000000	100	60	17.888					1.06	3.75	1e+17	1.75	10000000000000	100	60	23.4815
		1.06	3.75	1e+17	1.75	10000000000000	100	100	24.4916					1.06	3.76	1e+17	1.75	10000000000000	100	100	17.888					1.06	3.75	1e+17	1.75	10000000000000	100	100	23.4816
		1.06	3.75	1e+17	1.75	100000000000000	20	20	23.9363					1.06	3.76	1e+17	1.75	100000000000000	20	20	13.069					1.06	3.75	1e+17	1.75	100000000000000	20	20	23.0599
		1.06	3.75	1e+17	1.75	100000000000000	20	60	23.9367					1.06	3.76	1e+17	1.75	100000000000000	20	60	13.069					1.06	3.75	1e+17	1.75	100000000000000	20	60	23.0603
		1.06	3.75	1e+17	1.75	100000000000000	20	100	23.9367					1.06	3.76	1e+17	1.75	100000000000000	20	100	13.069					1.06	3.75	1e+17	1.75	100000000000000	20	100	23.0604
		1.06	3.75	1e+17	1.75	100000000000000	60	20	24.1098					1.06	3.76	1e+17	1.75	100000000000000	60	20	13.3886					1.06	3.75	1e+17	1.75	100000000000000	60	20	23.2327
		1.06	3.75	1e+17	1.75	100000000000000	60	60	24.1102					1.06	3.76	1e+17	1.75	100000000000000	60	60	13.3886					1.06	3.75	1e+17	1.75	100000000000000	60	60	23.2332
		1.06	3.75	1e+17	1.75	100000000000000	60	100	24.1103					1.06	3.76	1e+17	1.75	100000000000000	60	100	13.3886					1.06	3.75	1e+17	1.75	100000000000000	60	100	23.2333
		1.06	3.75	1e+17	1.75	100000000000000	100	20	24.1452					1.06	3.76	1e+17	1.75	100000000000000	100	20	13.4556					1.06	3.75	1e+17	1.75	100000000000000	100	20	23.2681
		1.06	3.75	1e+17	1.75	100000000000000	100	60	24.1456					1.06	3.76	1e+17	1.75	100000000000000	100	60	13.4556					1.06	3.75	1e+17	1.75	100000000000000	100	60	23.2685
		1.06	3.75	1e+17	1.75	100000000000000	100	100	24.1457					1.06	3.76	1e+17	1.75	100000000000000	100	100	13.4556					1.06	3.75	1e+17	1.75	100000000000000	100	100	23.2686
		1.06	3.75	1e+17	1.75	1000000000000000	20	20	21.1669					1.06	3.76	1e+17	1.75	1000000000000000	20	20	8.14929					1.06	3.75	1e+17	1.75	1000000000000000	20	20	20.5132
		1.06	3.75	1e+17	1.75	1000000000000000	20	60	21.167					1.06	3.76	1e+17	1.75	1000000000000000	20	60	8.14923					1.06	3.75	1e+17	1.75	1000000000000000	20	60	20.5133
		1.06	3.75	1e+17	1.75	1000000000000000	20	100	21.167					1.06	3.76	1e+17	1.75	1000000000000000	20	100	8.14922					1.06	3.75	1e+17	1.75	1000000000000000	20	100	20.5133
		1.06	3.75	1e+17	1.75	1000000000000000	60	20	22.2406					1.06	3.76	1e+17	1.75	1000000000000000	60	20	8.7882					1.06	3.75	1e+17	1.75	1000000000000000	60	20	21.593
		1.06	3.75	1e+17	1.75	1000000000000000	60	60	22.2408					1.06	3.76	1e+17	1.75	1000000000000000	60	60	8.78819					1.06	3.75	1e+17	1.75	1000000000000000	60	60	21.5932
		1.06	3.75	1e+17	1.75	1000000000000000	60	100	22.2408					1.06	3.76	1e+17	1.75	1000000000000000	60	100	8.78819					1.06	3.75	1e+17	1.75	1000000000000000	60	100	21.5933
		1.06	3.75	1e+17	1.75	1000000000000000	100	20	22.4921					1.06	3.76	1e+17	1.75	1000000000000000	100	20	8.94208					1.06	3.75	1e+17	1.75	1000000000000000	100	20	21.8467
		1.06	3.75	1e+17	1.75	1000000000000000	100	60	22.4923					1.06	3.76	1e+17	1.75	1000000000000000	100	60	8.94208					1.06	3.75	1e+17	1.75	1000000000000000	100	60	21.8469
		1.06	3.75	1e+17	1.75	1000000000000000	100	100	22.4924					1.06	3.76	1e+17	1.75	1000000000000000	100	100	8.94208					1.06	3.75	1e+17	1.75	1000000000000000	100	100	21.847
		1.06	3.75	1e+17	1.75	1e+16	20	20	14.8121					1.06	3.76	1e+17	1.75	1e+16	20	20	4.16648					1.06	3.75	1e+17	1.75	1e+16	20	20	14.2782
		1.06	3.75	1e+17	1.75	1e+16	20	60	14.8121					1.06	3.76	1e+17	1.75	1e+16	20	60	4.16651					1.06	3.75	1e+17	1.75	1e+16	20	60	14.2781
		1.06	3.75	1e+17	1.75	1e+16	20	100	14.812					1.06	3.76	1e+17	1.75	1e+16	20	100	4.16651					1.06	3.75	1e+17	1.75	1e+16	20	100	14.2781
		1.06	3.75	1e+17	1.75	1e+16	60	20	17.0688					1.06	3.76	1e+17	1.75	1e+16	60	20	4.691					1.06	3.75	1e+17	1.75	1e+16	60	20	16.4175
		1.06	3.75	1e+17	1.75	1e+16	60	60	17.0686					1.06	3.76	1e+17	1.75	1e+16	60	60	4.69101					1.06	3.75	1e+17	1.75	1e+16	60	60	16.4174
		1.06	3.75	1e+17	1.75	1e+16	60	100	17.0686					1.06	3.76	1e+17	1.75	1e+16	60	100	4.69101					1.06	3.75	1e+17	1.75	1e+16	60	100	16.4174
		1.06	3.75	1e+17	1.75	1e+16	100	20	17.9157					1.06	3.76	1e+17	1.75	1e+16	100	20	4.86302					1.06	3.75	1e+17	1.75	1e+16	100	20	17.2098
		1.06	3.75	1e+17	1.75	1e+16	100	60	17.9156					1.06	3.76	1e+17	1.75	1e+16	100	60	4.86302					1.06	3.75	1e+17	1.75	1e+16	100	60	17.2097
		1.06	3.75	1e+17	1.75	1e+16	100	100	17.9156					1.06	3.76	1e+17	1.75	1e+16	100	100	4.86302					1.06	3.75	1e+17	1.75	1e+16	100	100	17.2097
		1.06	3.75	1e+18	0.75	10000000000000	20	20	22.3431					1.06	3.76	1e+18	0.75	10000000000000	20	20	18.2313					1.06	3.75	1e+18	0.75	10000000000000	20	20	21.373
		1.06	3.75	1e+18	0.75	10000000000000	20	60	22.3431					1.06	3.76	1e+18	0.75	10000000000000	20	60	18.2313					1.06	3.75	1e+18	0.75	10000000000000	20	60	21.3731
		1.06	3.75	1e+18	0.75	10000000000000	20	100	22.3431					1.06	3.76	1e+18	0.75	10000000000000	20	100	18.2313					1.06	3.75	1e+18	0.75	10000000000000	20	100	21.3731
		1.06	3.75	1e+18	0.75	10000000000000	60	20	22.3772					1.06	3.76	1e+18	0.75	10000000000000	60	20	18.3372					1.06	3.75	1e+18	0.75	10000000000000	60	20	21.4051
		1.06	3.75	1e+18	0.75	10000000000000	60	60	22.3772					1.06	3.76	1e+18	0.75	10000000000000	60	60	18.3372					1.06	3.75	1e+18	0.75	10000000000000	60	60	21.4051
		1.06	3.75	1e+18	0.75	10000000000000	60	100	22.3772					1.06	3.76	1e+18	0.75	10000000000000	60	100	18.3372					1.06	3.75	1e+18	0.75	10000000000000	60	100	21.4051
		1.06	3.75	1e+18	0.75	10000000000000	100	20	22.384					1.06	3.76	1e+18	0.75	10000000000000	100	20	18.3588					1.06	3.75	1e+18	0.75	10000000000000	100	20	21.4116
		1.06	3.75	1e+18	0.75	10000000000000	100	60	22.3841					1.06	3.76	1e+18	0.75	10000000000000	100	60	18.3588					1.06	3.75	1e+18	0.75	10000000000000	100	60	21.4116
		1.06	3.75	1e+18	0.75	10000000000000	100	100	22.3841					1.06	3.76	1e+18	0.75	10000000000000	100	100	18.3588					1.06	3.75	1e+18	0.75	10000000000000	100	100	21.4116
		1.06	3.75	1e+18	0.75	100000000000000	20	20	22.2782					1.06	3.76	1e+18	0.75	100000000000000	20	20	17.1319					1.06	3.75	1e+18	0.75	100000000000000	20	20	21.3184
		1.06	3.75	1e+18	0.75	100000000000000	20	60	22.2783					1.06	3.76	1e+18	0.75	100000000000000	20	60	17.1318					1.06	3.75	1e+18	0.75	100000000000000	20	60	21.3185
		1.06	3.75	1e+18	0.75	100000000000000	20	100	22.2783					1.06	3.76	1e+18	0.75	100000000000000	20	100	17.1318					1.06	3.75	1e+18	0.75	100000000000000	20	100	21.3185
		1.06	3.75	1e+18	0.75	100000000000000	60	20	22.3453					1.06	3.76	1e+18	0.75	100000000000000	60	20	17.2856					1.06	3.75	1e+18	0.75	100000000000000	60	20	21.3816
		1.06	3.75	1e+18	0.75	100000000000000	60	60	22.3453					1.06	3.76	1e+18	0.75	100000000000000	60	60	17.2856					1.06	3.75	1e+18	0.75	100000000000000	60	60	21.3816
		1.06	3.75	1e+18	0.75	100000000000000	60	100	22.3453					1.06	3.76	1e+18	0.75	100000000000000	60	100	17.2856					1.06	3.75	1e+18	0.75	100000000000000	60	100	21.3817
		1.06	3.75	1e+18	0.75	100000000000000	100	20	22.3588					1.06	3.76	1e+18	0.75	100000000000000	100	20	17.3171					1.06	3.75	1e+18	0.75	100000000000000	100	20	21.3944
		1.06	3.75	1e+18	0.75	100000000000000	100	60	22.3588					1.06	3.76	1e+18	0.75	100000000000000	100	60	17.3171					1.06	3.75	1e+18	0.75	100000000000000	100	60	21.3944
		1.06	3.75	1e+18	0.75	100000000000000	100	100	22.3588					1.06	3.76	1e+18	0.75	100000000000000	100	100	17.3171					1.06	3.75	1e+18	0.75	100000000000000	100	100	21.3944
		1.06	3.75	1e+18	0.75	1000000000000000	20	20	21.6751					1.06	3.76	1e+18	0.75	1000000000000000	20	20	13.3821					1.06	3.75	1e+18	0.75	1000000000000000	20	20	20.7998
		1.06	3.75	1e+18	0.75	1000000000000000	20	60	21.6751					1.06	3.76	1e+18	0.75	1000000000000000	20	60	13.3821					1.06	3.75	1e+18	0.75	1000000000000000	20	60	20.7998
		1.06	3.75	1e+18	0.75	1000000000000000	20	100	21.6751					1.06	3.76	1e+18	0.75	1000000000000000	20	100	13.3821					1.06	3.75	1e+18	0.75	1000000000000000	20	100	20.7998
		1.06	3.75	1e+18	0.75	1000000000000000	60	20	22.0471					1.06	3.76	1e+18	0.75	1000000000000000	60	20	13.7315					1.06	3.75	1e+18	0.75	1000000000000000	60	20	21.1534
		1.06	3.75	1e+18	0.75	1000000000000000	60	60	22.0471					1.06	3.76	1e+18	0.75	1000000000000000	60	60	13.7315					1.06	3.75	1e+18	0.75	1000000000000000	60	60	21.1534
		1.06	3.75	1e+18	0.75	1000000000000000	60	100	22.0471					1.06	3.76	1e+18	0.75	1000000000000000	60	100	13.7315					1.06	3.75	1e+18	0.75	1000000000000000	60	100	21.1534
		1.06	3.75	1e+18	0.75	1000000000000000	100	20	22.1243					1.06	3.76	1e+18	0.75	1000000000000000	100	20	13.805					1.06	3.75	1e+18	0.75	1000000000000000	100	20	21.2268
		1.06	3.75	1e+18	0.75	1000000000000000	100	60	22.1243					1.06	3.76	1e+18	0.75	1000000000000000	100	60	13.805					1.06	3.75	1e+18	0.75	1000000000000000	100	60	21.2268
		1.06	3.75	1e+18	0.75	1000000000000000	100	100	22.1243					1.06	3.76	1e+18	0.75	1000000000000000	100	100	13.805					1.06	3.75	1e+18	0.75	1000000000000000	100	100	21.2268
		1.06	3.75	1e+18	0.75	1e+16	20	20	17.879					1.06	3.76	1e+18	0.75	1e+16	20	20	8.30156					1.06	3.75	1e+18	0.75	1e+16	20	20	17.3315
		1.06	3.75	1e+18	0.75	1e+16	20	60	17.879					1.06	3.76	1e+18	0.75	1e+16	20	60	8.30156					1.06	3.75	1e+18	0.75	1e+16	20	60	17.3315
		1.06	3.75	1e+18	0.75	1e+16	20	100	17.879					1.06	3.76	1e+18	0.75	1e+16	20	100	8.30156					1.06	3.75	1e+18	0.75	1e+16	20	100	17.3315
		1.06	3.75	1e+18	0.75	1e+16	60	20	19.9589					1.06	3.76	1e+18	0.75	1e+16	60	20	9.19735					1.06	3.75	1e+18	0.75	1e+16	60	20	19.3358
		1.06	3.75	1e+18	0.75	1e+16	60	60	19.9589					1.06	3.76	1e+18	0.75	1e+16	60	60	9.19735					1.06	3.75	1e+18	0.75	1e+16	60	60	19.3359
		1.06	3.75	1e+18	0.75	1e+16	60	100	19.9589					1.06	3.76	1e+18	0.75	1e+16	60	100	9.19735					1.06	3.75	1e+18	0.75	1e+16	60	100	19.3359
		1.06	3.75	1e+18	0.75	1e+16	100	20	20.5007					1.06	3.76	1e+18	0.75	1e+16	100	20	9.4291					1.06	3.75	1e+18	0.75	1e+16	100	20	19.8589
		1.06	3.75	1e+18	0.75	1e+16	100	60	20.5008					1.06	3.76	1e+18	0.75	1e+16	100	60	9.4291					1.06	3.75	1e+18	0.75	1e+16	100	60	19.8589
		1.06	3.75	1e+18	0.75	1e+16	100	100	20.5008					1.06	3.76	1e+18	0.75	1e+16	100	100	9.4291					1.06	3.75	1e+18	0.75	1e+16	100	100	19.8589
		1.06	3.75	1e+18	1	10000000000000	20	20	23.4583					1.06	3.76	1e+18	1	10000000000000	20	20	19.0364					1.06	3.75	1e+18	1	10000000000000	20	20	22.4258
		1.06	3.75	1e+18	1	10000000000000	20	60	23.4583					1.06	3.76	1e+18	1	10000000000000	20	60	19.0364					1.06	3.75	1e+18	1	10000000000000	20	60	22.4258
		1.06	3.75	1e+18	1	10000000000000	20	100	23.4583					1.06	3.76	1e+18	1	10000000000000	20	100	19.0364					1.06	3.75	1e+18	1	10000000000000	20	100	22.4258
		1.06	3.75	1e+18	1	10000000000000	60	20	23.5004					1.06	3.76	1e+18	1	10000000000000	60	20	19.1522					1.06	3.75	1e+18	1	10000000000000	60	20	22.4655
		1.06	3.75	1e+18	1	10000000000000	60	60	23.5004					1.06	3.76	1e+18	1	10000000000000	60	60	19.1522					1.06	3.75	1e+18	1	10000000000000	60	60	22.4655
		1.06	3.75	1e+18	1	10000000000000	60	100	23.5004					1.06	3.76	1e+18	1	10000000000000	60	100	19.1522					1.06	3.75	1e+18	1	10000000000000	60	100	22.4655
		1.06	3.75	1e+18	1	10000000000000	100	20	23.5089					1.06	3.76	1e+18	1	10000000000000	100	20	19.1758					1.06	3.75	1e+18	1	10000000000000	100	20	22.4735
		1.06	3.75	1e+18	1	10000000000000	100	60	23.509					1.06	3.76	1e+18	1	10000000000000	100	60	19.1758					1.06	3.75	1e+18	1	10000000000000	100	60	22.4735
		1.06	3.75	1e+18	1	10000000000000	100	100	23.509					1.06	3.76	1e+18	1	10000000000000	100	100	19.1758					1.06	3.75	1e+18	1	10000000000000	100	100	22.4735
		1.06	3.75	1e+18	1	100000000000000	20	20	23.3556					1.06	3.76	1e+18	1	100000000000000	20	20	17.5854					1.06	3.75	1e+18	1	100000000000000	20	20	22.3416
		1.06	3.75	1e+18	1	100000000000000	20	60	23.3556					1.06	3.76	1e+18	1	100000000000000	20	60	17.5854					1.06	3.75	1e+18	1	100000000000000	20	60	22.3416
		1.06	3.75	1e+18	1	100000000000000	20	100	23.3556					1.06	3.76	1e+18	1	100000000000000	20	100	17.5854					1.06	3.75	1e+18	1	100000000000000	20	100	22.3416
		1.06	3.75	1e+18	1	100000000000000	60	20	23.4512					1.06	3.76	1e+18	1	100000000000000	60	20	17.765					1.06	3.75	1e+18	1	100000000000000	60	20	22.4318
		1.06	3.75	1e+18	1	100000000000000	60	60	23.4512					1.06	3.76	1e+18	1	100000000000000	60	60	17.765					1.06	3.75	1e+18	1	100000000000000	60	60	22.4318
		1.06	3.75	1e+18	1	100000000000000	60	100	23.4512					1.06	3.76	1e+18	1	100000000000000	60	100	17.765					1.06	3.75	1e+18	1	100000000000000	60	100	22.4318
		1.06	3.75	1e+18	1	100000000000000	100	20	23.4706					1.06	3.76	1e+18	1	100000000000000	100	20	17.8018					1.06	3.75	1e+18	1	100000000000000	100	20	22.4501
		1.06	3.75	1e+18	1	100000000000000	100	60	23.4706					1.06	3.76	1e+18	1	100000000000000	100	60	17.8018					1.06	3.75	1e+18	1	100000000000000	100	60	22.4501
		1.06	3.75	1e+18	1	100000000000000	100	100	23.4706					1.06	3.76	1e+18	1	100000000000000	100	100	17.8018					1.06	3.75	1e+18	1	100000000000000	100	100	22.4501
		1.06	3.75	1e+18	1	1000000000000000	20	20	22.4343					1.06	3.76	1e+18	1	1000000000000000	20	20	13.3359					1.06	3.75	1e+18	1	1000000000000000	20	20	21.5377
		1.06	3.75	1e+18	1	1000000000000000	20	60	22.4343					1.06	3.76	1e+18	1	1000000000000000	20	60	13.3359					1.06	3.75	1e+18	1	1000000000000000	20	60	21.5377
		1.06	3.75	1e+18	1	1000000000000000	20	100	22.4343					1.06	3.76	1e+18	1	1000000000000000	20	100	13.3359					1.06	3.75	1e+18	1	1000000000000000	20	100	21.5377
		1.06	3.75	1e+18	1	1000000000000000	60	20	23.0013					1.06	3.76	1e+18	1	1000000000000000	60	20	13.7676					1.06	3.75	1e+18	1	1000000000000000	60	20	22.0785
		1.06	3.75	1e+18	1	1000000000000000	60	60	23.0013					1.06	3.76	1e+18	1	1000000000000000	60	60	13.7676					1.06	3.75	1e+18	1	1000000000000000	60	60	22.0785
		1.06	3.75	1e+18	1	1000000000000000	60	100	23.0013					1.06	3.76	1e+18	1	1000000000000000	60	100	13.7676					1.06	3.75	1e+18	1	1000000000000000	60	100	22.0785
		1.06	3.75	1e+18	1	1000000000000000	100	20	23.122					1.06	3.76	1e+18	1	1000000000000000	100	20	13.8603					1.06	3.75	1e+18	1	1000000000000000	100	20	22.1937
		1.06	3.75	1e+18	1	1000000000000000	100	60	23.122					1.06	3.76	1e+18	1	1000000000000000	100	60	13.8603					1.06	3.75	1e+18	1	1000000000000000	100	60	22.1937
		1.06	3.75	1e+18	1	1000000000000000	100	100	23.122					1.06	3.76	1e+18	1	1000000000000000	100	100	13.8603					1.06	3.75	1e+18	1	1000000000000000	100	100	22.1937
		1.06	3.75	1e+18	1	1e+16	20	20	17.6095					1.06	3.76	1e+18	1	1e+16	20	20	8.01936					1.06	3.75	1e+18	1	1e+16	20	20	17.0857
		1.06	3.75	1e+18	1	1e+16	20	60	17.6095					1.06	3.76	1e+18	1	1e+16	20	60	8.01936					1.06	3.75	1e+18	1	1e+16	20	60	17.0857
		1.06	3.75	1e+18	1	1e+16	20	100	17.6095					1.06	3.76	1e+18	1	1e+16	20	100	8.01936					1.06	3.75	1e+18	1	1e+16	20	100	17.0857
		1.06	3.75	1e+18	1	1e+16	60	20	20.1352					1.06	3.76	1e+18	1	1e+16	60	20	8.96674					1.06	3.75	1e+18	1	1e+16	60	20	19.5243
		1.06	3.75	1e+18	1	1e+16	60	60	20.1352					1.06	3.76	1e+18	1	1e+16	60	60	8.96674					1.06	3.75	1e+18	1	1e+16	60	60	19.5243
		1.06	3.75	1e+18	1	1e+16	60	100	20.1352					1.06	3.76	1e+18	1	1e+16	60	100	8.96674					1.06	3.75	1e+18	1	1e+16	60	100	19.5243
		1.06	3.75	1e+18	1	1e+16	100	20	20.8829					1.06	3.76	1e+18	1	1e+16	100	20	9.24121					1.06	3.75	1e+18	1	1e+16	100	20	20.2467
		1.06	3.75	1e+18	1	1e+16	100	60	20.8829					1.06	3.76	1e+18	1	1e+16	100	60	9.24121					1.06	3.75	1e+18	1	1e+16	100	60	20.2467
		1.06	3.75	1e+18	1	1e+16	100	100	20.8829					1.06	3.76	1e+18	1	1e+16	100	100	9.24121					1.06	3.75	1e+18	1	1e+16	100	100	20.2467
		1.06	3.75	1e+18	1.25	10000000000000	20	20	24.0462					1.06	3.76	1e+18	1.25	10000000000000	20	20	19.4385					1.06	3.75	1e+18	1.25	10000000000000	20	20	22.9836
		1.06	3.75	1e+18	1.25	10000000000000	20	60	24.0462					1.06	3.76	1e+18	1.25	10000000000000	20	60	19.4385					1.06	3.75	1e+18	1.25	10000000000000	20	60	22.9837
		1.06	3.75	1e+18	1.25	10000000000000	20	100	24.0462					1.06	3.76	1e+18	1.25	10000000000000	20	100	19.4385					1.06	3.75	1e+18	1.25	10000000000000	20	100	22.9837
		1.06	3.75	1e+18	1.25	10000000000000	60	20	24.0947					1.06	3.76	1e+18	1.25	10000000000000	60	20	19.5601					1.06	3.75	1e+18	1.25	10000000000000	60	20	23.0294
		1.06	3.75	1e+18	1.25	10000000000000	60	60	24.0947					1.06	3.76	1e+18	1.25	10000000000000	60	60	19.5601					1.06	3.75	1e+18	1.25	10000000000000	60	60	23.0294
		1.06	3.75	1e+18	1.25	10000000000000	60	100	24.0947					1.06	3.76	1e+18	1.25	10000000000000	60	100	19.5601					1.06	3.75	1e+18	1.25	10000000000000	60	100	23.0294
		1.06	3.75	1e+18	1.25	10000000000000	100	20	24.1045					1.06	3.76	1e+18	1.25	10000000000000	100	20	19.5849					1.06	3.75	1e+18	1.25	10000000000000	100	20	23.0386
		1.06	3.75	1e+18	1.25	10000000000000	100	60	24.1045					1.06	3.76	1e+18	1.25	10000000000000	100	60	19.5849					1.06	3.75	1e+18	1.25	10000000000000	100	60	23.0387
		1.06	3.75	1e+18	1.25	10000000000000	100	100	24.1045					1.06	3.76	1e+18	1.25	10000000000000	100	100	19.5849					1.06	3.75	1e+18	1.25	10000000000000	100	100	23.0387
		1.06	3.75	1e+18	1.25	100000000000000	20	20	23.9039					1.06	3.76	1e+18	1.25	100000000000000	20	20	17.6887					1.06	3.75	1e+18	1.25	100000000000000	20	20	22.8617
		1.06	3.75	1e+18	1.25	100000000000000	20	60	23.9039					1.06	3.76	1e+18	1.25	100000000000000	20	60	17.6887					1.06	3.75	1e+18	1.25	100000000000000	20	60	22.8617
		1.06	3.75	1e+18	1.25	100000000000000	20	100	23.9039					1.06	3.76	1e+18	1.25	100000000000000	20	100	17.6887					1.06	3.75	1e+18	1.25	100000000000000	20	100	22.8617
		1.06	3.75	1e+18	1.25	100000000000000	60	20	24.0276					1.06	3.76	1e+18	1.25	100000000000000	60	20	17.8876					1.06	3.75	1e+18	1.25	100000000000000	60	20	22.9785
		1.06	3.75	1e+18	1.25	100000000000000	60	60	24.0276					1.06	3.76	1e+18	1.25	100000000000000	60	60	17.8876					1.06	3.75	1e+18	1.25	100000000000000	60	60	22.9785
		1.06	3.75	1e+18	1.25	100000000000000	60	100	24.0276					1.06	3.76	1e+18	1.25	100000000000000	60	100	17.8876					1.06	3.75	1e+18	1.25	100000000000000	60	100	22.9785
		1.06	3.75	1e+18	1.25	100000000000000	100	20	24.0527					1.06	3.76	1e+18	1.25	100000000000000	100	20	17.9286					1.06	3.75	1e+18	1.25	100000000000000	100	20	23.0022
		1.06	3.75	1e+18	1.25	100000000000000	100	60	24.0527					1.06	3.76	1e+18	1.25	100000000000000	100	60	17.9286					1.06	3.75	1e+18	1.25	100000000000000	100	60	23.0023
		1.06	3.75	1e+18	1.25	100000000000000	100	100	24.0528					1.06	3.76	1e+18	1.25	100000000000000	100	100	17.9286					1.06	3.75	1e+18	1.25	100000000000000	100	100	23.0023
		1.06	3.75	1e+18	1.25	1000000000000000	20	20	22.6783					1.06	3.76	1e+18	1.25	1000000000000000	20	20	13.1262					1.06	3.75	1e+18	1.25	1000000000000000	20	20	21.7843
		1.06	3.75	1e+18	1.25	1000000000000000	20	60	22.6783					1.06	3.76	1e+18	1.25	1000000000000000	20	60	13.1262					1.06	3.75	1e+18	1.25	1000000000000000	20	60	21.7843
		1.06	3.75	1e+18	1.25	1000000000000000	20	100	22.6783					1.06	3.76	1e+18	1.25	1000000000000000	20	100	13.1262					1.06	3.75	1e+18	1.25	1000000000000000	20	100	21.7843
		1.06	3.75	1e+18	1.25	1000000000000000	60	20	23.4278					1.06	3.76	1e+18	1.25	1000000000000000	60	20	13.6178					1.06	3.75	1e+18	1.25	1000000000000000	60	20	22.5015
		1.06	3.75	1e+18	1.25	1000000000000000	60	60	23.4279					1.06	3.76	1e+18	1.25	1000000000000000	60	60	13.6178					1.06	3.75	1e+18	1.25	1000000000000000	60	60	22.5015
		1.06	3.75	1e+18	1.25	1000000000000000	60	100	23.4279					1.06	3.76	1e+18	1.25	1000000000000000	60	100	13.6178					1.06	3.75	1e+18	1.25	1000000000000000	60	100	22.5015
		1.06	3.75	1e+18	1.25	1000000000000000	100	20	23.5921					1.06	3.76	1e+18	1.25	1000000000000000	100	20	13.726					1.06	3.75	1e+18	1.25	1000000000000000	100	20	22.6588
		1.06	3.75	1e+18	1.25	1000000000000000	100	60	23.5921					1.06	3.76	1e+18	1.25	1000000000000000	100	60	13.726					1.06	3.75	1e+18	1.25	1000000000000000	100	60	22.6588
		1.06	3.75	1e+18	1.25	1000000000000000	100	100	23.5922					1.06	3.76	1e+18	1.25	1000000000000000	100	100	13.726					1.06	3.75	1e+18	1.25	1000000000000000	100	100	22.6588
		1.06	3.75	1e+18	1.25	1e+16	20	20	17.299					1.06	3.76	1e+18	1.25	1e+16	20	20	7.81004					1.06	3.75	1e+18	1.25	1e+16	20	20	16.7943
		1.06	3.75	1e+18	1.25	1e+16	20	60	17.299					1.06	3.76	1e+18	1.25	1e+16	20	60	7.81004					1.06	3.75	1e+18	1.25	1e+16	20	60	16.7943
		1.06	3.75	1e+18	1.25	1e+16	20	100	17.299					1.06	3.76	1e+18	1.25	1e+16	20	100	7.81004					1.06	3.75	1e+18	1.25	1e+16	20	100	16.7943
		1.06	3.75	1e+18	1.25	1e+16	60	20	19.9595					1.06	3.76	1e+18	1.25	1e+16	60	20	8.70685					1.06	3.75	1e+18	1.25	1e+16	60	20	19.3666
		1.06	3.75	1e+18	1.25	1e+16	60	60	19.9595					1.06	3.76	1e+18	1.25	1e+16	60	60	8.70685					1.06	3.75	1e+18	1.25	1e+16	60	60	19.3666
		1.06	3.75	1e+18	1.25	1e+16	60	100	19.9595					1.06	3.76	1e+18	1.25	1e+16	60	100	8.70685					1.06	3.75	1e+18	1.25	1e+16	60	100	19.3666
		1.06	3.75	1e+18	1.25	1e+16	100	20	20.8399					1.06	3.76	1e+18	1.25	1e+16	100	20	8.99129					1.06	3.75	1e+18	1.25	1e+16	100	20	20.2173
		1.06	3.75	1e+18	1.25	1e+16	100	60	20.8399					1.06	3.76	1e+18	1.25	1e+16	100	60	8.99129					1.06	3.75	1e+18	1.25	1e+16	100	60	20.2173
		1.06	3.75	1e+18	1.25	1e+16	100	100	20.8399					1.06	3.76	1e+18	1.25	1e+16	100	100	8.99129					1.06	3.75	1e+18	1.25	1e+16	100	100	20.2173
		1.06	3.75	1e+18	1.5	10000000000000	20	20	24.3828					1.06	3.76	1e+18	1.5	10000000000000	20	20	19.6489					1.06	3.75	1e+18	1.5	10000000000000	20	20	23.3034
		1.06	3.75	1e+18	1.5	10000000000000	20	60	24.3828					1.06	3.76	1e+18	1.5	10000000000000	20	60	19.6489					1.06	3.75	1e+18	1.5	10000000000000	20	60	23.3035
		1.06	3.75	1e+18	1.5	10000000000000	20	100	24.3828					1.06	3.76	1e+18	1.5	10000000000000	20	100	19.6489					1.06	3.75	1e+18	1.5	10000000000000	20	100	23.3035
		1.06	3.75	1e+18	1.5	10000000000000	60	20	24.4365					1.06	3.76	1e+18	1.5	10000000000000	60	20	19.7738					1.06	3.75	1e+18	1.5	10000000000000	60	20	23.3541
		1.06	3.75	1e+18	1.5	10000000000000	60	60	24.4365					1.06	3.76	1e+18	1.5	10000000000000	60	60	19.7738					1.06	3.75	1e+18	1.5	10000000000000	60	60	23.3542
		1.06	3.75	1e+18	1.5	10000000000000	60	100	24.4365					1.06	3.76	1e+18	1.5	10000000000000	60	100	19.7738					1.06	3.75	1e+18	1.5	10000000000000	60	100	23.3542
		1.06	3.75	1e+18	1.5	10000000000000	100	20	24.4473					1.06	3.76	1e+18	1.5	10000000000000	100	20	19.7994					1.06	3.75	1e+18	1.5	10000000000000	100	20	23.3644
		1.06	3.75	1e+18	1.5	10000000000000	100	60	24.4474					1.06	3.76	1e+18	1.5	10000000000000	100	60	19.7994					1.06	3.75	1e+18	1.5	10000000000000	100	60	23.3644
		1.06	3.75	1e+18	1.5	10000000000000	100	100	24.4474					1.06	3.76	1e+18	1.5	10000000000000	100	100	19.7993					1.06	3.75	1e+18	1.5	10000000000000	100	100	23.3644
		1.06	3.75	1e+18	1.5	100000000000000	20	20	24.2004					1.06	3.76	1e+18	1.5	100000000000000	20	20	17.643					1.06	3.75	1e+18	1.5	100000000000000	20	20	23.1461
		1.06	3.75	1e+18	1.5	100000000000000	20	60	24.2004					1.06	3.76	1e+18	1.5	100000000000000	20	60	17.6429					1.06	3.75	1e+18	1.5	100000000000000	20	60	23.1462
		1.06	3.75	1e+18	1.5	100000000000000	20	100	24.2004					1.06	3.76	1e+18	1.5	100000000000000	20	100	17.6429					1.06	3.75	1e+18	1.5	100000000000000	20	100	23.1462
		1.06	3.75	1e+18	1.5	100000000000000	60	20	24.3513					1.06	3.76	1e+18	1.5	100000000000000	60	20	17.8565					1.06	3.75	1e+18	1.5	100000000000000	60	20	23.2888
		1.06	3.75	1e+18	1.5	100000000000000	60	60	24.3513					1.06	3.76	1e+18	1.5	100000000000000	60	60	17.8565					1.06	3.75	1e+18	1.5	100000000000000	60	60	23.2889
		1.06	3.75	1e+18	1.5	100000000000000	60	100	24.3513					1.06	3.76	1e+18	1.5	100000000000000	60	100	17.8565					1.06	3.75	1e+18	1.5	100000000000000	60	100	23.2889
		1.06	3.75	1e+18	1.5	100000000000000	100	20	24.3821					1.06	3.76	1e+18	1.5	100000000000000	100	20	17.9007					1.06	3.75	1e+18	1.5	100000000000000	100	20	23.318
		1.06	3.75	1e+18	1.5	100000000000000	100	60	24.3821					1.06	3.76	1e+18	1.5	100000000000000	100	60	17.9007					1.06	3.75	1e+18	1.5	100000000000000	100	60	23.3181
		1.06	3.75	1e+18	1.5	100000000000000	100	100	24.3822					1.06	3.76	1e+18	1.5	100000000000000	100	100	17.9007					1.06	3.75	1e+18	1.5	100000000000000	100	100	23.3181
		1.06	3.75	1e+18	1.5	1000000000000000	20	20	22.6974					1.06	3.76	1e+18	1.5	1000000000000000	20	20	12.8757					1.06	3.75	1e+18	1.5	1000000000000000	20	20	21.8147
		1.06	3.75	1e+18	1.5	1000000000000000	20	60	22.6974					1.06	3.76	1e+18	1.5	1000000000000000	20	60	12.8757					1.06	3.75	1e+18	1.5	1000000000000000	20	60	21.8147
		1.06	3.75	1e+18	1.5	1000000000000000	20	100	22.6974					1.06	3.76	1e+18	1.5	1000000000000000	20	100	12.8757					1.06	3.75	1e+18	1.5	1000000000000000	20	100	21.8147
		1.06	3.75	1e+18	1.5	1000000000000000	60	20	23.6075					1.06	3.76	1e+18	1.5	1000000000000000	60	20	13.405					1.06	3.75	1e+18	1.5	1000000000000000	60	20	22.6875
		1.06	3.75	1e+18	1.5	1000000000000000	60	60	23.6075					1.06	3.76	1e+18	1.5	1000000000000000	60	60	13.405					1.06	3.75	1e+18	1.5	1000000000000000	60	60	22.6875
		1.06	3.75	1e+18	1.5	1000000000000000	60	100	23.6075					1.06	3.76	1e+18	1.5	1000000000000000	60	100	13.405					1.06	3.75	1e+18	1.5	1000000000000000	60	100	22.6875
		1.06	3.75	1e+18	1.5	1000000000000000	100	20	23.8135					1.06	3.76	1e+18	1.5	1000000000000000	100	20	13.525					1.06	3.75	1e+18	1.5	1000000000000000	100	20	22.8853
		1.06	3.75	1e+18	1.5	1000000000000000	100	60	23.8136					1.06	3.76	1e+18	1.5	1000000000000000	100	60	13.525					1.06	3.75	1e+18	1.5	1000000000000000	100	60	22.8854
		1.06	3.75	1e+18	1.5	1000000000000000	100	100	23.8136					1.06	3.76	1e+18	1.5	1000000000000000	100	100	13.525					1.06	3.75	1e+18	1.5	1000000000000000	100	100	22.8854
		1.06	3.75	1e+18	1.5	1e+16	20	20	17.083					1.06	3.76	1e+18	1.5	1e+16	20	20	7.68195					1.06	3.75	1e+18	1.5	1e+16	20	20	16.5902
		1.06	3.75	1e+18	1.5	1e+16	20	60	17.083					1.06	3.76	1e+18	1.5	1e+16	20	60	7.68195					1.06	3.75	1e+18	1.5	1e+16	20	60	16.5902
		1.06	3.75	1e+18	1.5	1e+16	20	100	17.083					1.06	3.76	1e+18	1.5	1e+16	20	100	7.68195					1.06	3.75	1e+18	1.5	1e+16	20	100	16.5902
		1.06	3.75	1e+18	1.5	1e+16	60	20	19.7081					1.06	3.76	1e+18	1.5	1e+16	60	20	8.48248					1.06	3.75	1e+18	1.5	1e+16	60	20	19.1314
		1.06	3.75	1e+18	1.5	1e+16	60	60	19.7081					1.06	3.76	1e+18	1.5	1e+16	60	60	8.48248					1.06	3.75	1e+18	1.5	1e+16	60	60	19.1314
		1.06	3.75	1e+18	1.5	1e+16	60	100	19.7081					1.06	3.76	1e+18	1.5	1e+16	60	100	8.48248					1.06	3.75	1e+18	1.5	1e+16	60	100	19.1314
		1.06	3.75	1e+18	1.5	1e+16	100	20	20.6542					1.06	3.76	1e+18	1.5	1e+16	100	20	8.7533					1.06	3.75	1e+18	1.5	1e+16	100	20	20.0459
		1.06	3.75	1e+18	1.5	1e+16	100	60	20.6542					1.06	3.76	1e+18	1.5	1e+16	100	60	8.7533					1.06	3.75	1e+18	1.5	1e+16	100	60	20.0459
		1.06	3.75	1e+18	1.5	1e+16	100	100	20.6542					1.06	3.76	1e+18	1.5	1e+16	100	100	8.7533					1.06	3.75	1e+18	1.5	1e+16	100	100	20.0459
		1.06	3.75	1e+18	1.75	10000000000000	20	20	24.5889					1.06	3.76	1e+18	1.75	10000000000000	20	20	19.7603					1.06	3.75	1e+18	1.75	10000000000000	20	20	23.4995
		1.06	3.75	1e+18	1.75	10000000000000	20	60	24.589					1.06	3.76	1e+18	1.75	10000000000000	20	60	19.7602					1.06	3.75	1e+18	1.75	10000000000000	20	60	23.4996
		1.06	3.75	1e+18	1.75	10000000000000	20	100	24.589					1.06	3.76	1e+18	1.75	10000000000000	20	100	19.7602					1.06	3.75	1e+18	1.75	10000000000000	20	100	23.4996
		1.06	3.75	1e+18	1.75	10000000000000	60	20	24.6471					1.06	3.76	1e+18	1.75	10000000000000	60	20	19.887					1.06	3.75	1e+18	1.75	10000000000000	60	20	23.5544
		1.06	3.75	1e+18	1.75	10000000000000	60	60	24.6472					1.06	3.76	1e+18	1.75	10000000000000	60	60	19.887					1.06	3.75	1e+18	1.75	10000000000000	60	60	23.5545
		1.06	3.75	1e+18	1.75	10000000000000	60	100	24.6472					1.06	3.76	1e+18	1.75	10000000000000	60	100	19.887					1.06	3.75	1e+18	1.75	10000000000000	60	100	23.5545
		1.06	3.75	1e+18	1.75	10000000000000	100	20	24.6589					1.06	3.76	1e+18	1.75	10000000000000	100	20	19.913					1.06	3.75	1e+18	1.75	10000000000000	100	20	23.5656
		1.06	3.75	1e+18	1.75	10000000000000	100	60	24.659					1.06	3.76	1e+18	1.75	10000000000000	100	60	19.913					1.06	3.75	1e+18	1.75	10000000000000	100	60	23.5656
		1.06	3.75	1e+18	1.75	10000000000000	100	100	24.659					1.06	3.76	1e+18	1.75	10000000000000	100	100	19.913					1.06	3.75	1e+18	1.75	10000000000000	100	100	23.5656
		1.06	3.75	1e+18	1.75	100000000000000	20	20	24.3665					1.06	3.76	1e+18	1.75	100000000000000	20	20	17.5338					1.06	3.75	1e+18	1.75	100000000000000	20	20	23.3068
		1.06	3.75	1e+18	1.75	100000000000000	20	60	24.3666					1.06	3.76	1e+18	1.75	100000000000000	20	60	17.5337					1.06	3.75	1e+18	1.75	100000000000000	20	60	23.3068
		1.06	3.75	1e+18	1.75	100000000000000	20	100	24.3666					1.06	3.76	1e+18	1.75	100000000000000	20	100	17.5337					1.06	3.75	1e+18	1.75	100000000000000	20	100	23.3068
		1.06	3.75	1e+18	1.75	100000000000000	60	20	24.5438					1.06	3.76	1e+18	1.75	100000000000000	60	20	17.7586					1.06	3.75	1e+18	1.75	100000000000000	60	20	23.4746
		1.06	3.75	1e+18	1.75	100000000000000	60	60	24.5438					1.06	3.76	1e+18	1.75	100000000000000	60	60	17.7586					1.06	3.75	1e+18	1.75	100000000000000	60	60	23.4747
		1.06	3.75	1e+18	1.75	100000000000000	60	100	24.5438					1.06	3.76	1e+18	1.75	100000000000000	60	100	17.7586					1.06	3.75	1e+18	1.75	100000000000000	60	100	23.4747
		1.06	3.75	1e+18	1.75	100000000000000	100	20	24.5802					1.06	3.76	1e+18	1.75	100000000000000	100	20	17.8053					1.06	3.75	1e+18	1.75	100000000000000	100	20	23.5091
		1.06	3.75	1e+18	1.75	100000000000000	100	60	24.5803					1.06	3.76	1e+18	1.75	100000000000000	100	60	17.8053					1.06	3.75	1e+18	1.75	100000000000000	100	60	23.5092
		1.06	3.75	1e+18	1.75	100000000000000	100	100	24.5803					1.06	3.76	1e+18	1.75	100000000000000	100	100	17.8053					1.06	3.75	1e+18	1.75	100000000000000	100	100	23.5092
		1.06	3.75	1e+18	1.75	1000000000000000	20	20	22.6195					1.06	3.76	1e+18	1.75	1000000000000000	20	20	12.6383					1.06	3.75	1e+18	1.75	1000000000000000	20	20	21.75
		1.06	3.75	1e+18	1.75	1000000000000000	20	60	22.6195					1.06	3.76	1e+18	1.75	1000000000000000	20	60	12.6383					1.06	3.75	1e+18	1.75	1000000000000000	20	60	21.75
		1.06	3.75	1e+18	1.75	1000000000000000	20	100	22.6195					1.06	3.76	1e+18	1.75	1000000000000000	20	100	12.6383					1.06	3.75	1e+18	1.75	1000000000000000	20	100	21.75
		1.06	3.75	1e+18	1.75	1000000000000000	60	20	23.663					1.06	3.76	1e+18	1.75	1000000000000000	60	20	13.1867					1.06	3.75	1e+18	1.75	1000000000000000	60	20	22.7538
		1.06	3.75	1e+18	1.75	1000000000000000	60	60	23.6631					1.06	3.76	1e+18	1.75	1000000000000000	60	60	13.1867					1.06	3.75	1e+18	1.75	1000000000000000	60	60	22.7538
		1.06	3.75	1e+18	1.75	1000000000000000	60	100	23.6631					1.06	3.76	1e+18	1.75	1000000000000000	60	100	13.1867					1.06	3.75	1e+18	1.75	1000000000000000	60	100	22.7538
		1.06	3.75	1e+18	1.75	1000000000000000	100	20	23.9078					1.06	3.76	1e+18	1.75	1000000000000000	100	20	13.3148					1.06	3.75	1e+18	1.75	1000000000000000	100	20	22.9895
		1.06	3.75	1e+18	1.75	1000000000000000	100	60	23.9079					1.06	3.76	1e+18	1.75	1000000000000000	100	60	13.3148					1.06	3.75	1e+18	1.75	1000000000000000	100	60	22.9896
		1.06	3.75	1e+18	1.75	1000000000000000	100	100	23.9079					1.06	3.76	1e+18	1.75	1000000000000000	100	100	13.3148					1.06	3.75	1e+18	1.75	1000000000000000	100	100	22.9896
		1.06	3.75	1e+18	1.75	1e+16	20	20	16.9542					1.06	3.76	1e+18	1.75	1e+16	20	20	7.60982					1.06	3.75	1e+18	1.75	1e+16	20	20	16.468
		1.06	3.75	1e+18	1.75	1e+16	20	60	16.9542					1.06	3.76	1e+18	1.75	1e+16	20	60	7.60982					1.06	3.75	1e+18	1.75	1e+16	20	60	16.468
		1.06	3.75	1e+18	1.75	1e+16	20	100	16.9542					1.06	3.76	1e+18	1.75	1e+16	20	100	7.60982					1.06	3.75	1e+18	1.75	1e+16	20	100	16.468
		1.06	3.75	1e+18	1.75	1e+16	60	20	19.4766					1.06	3.76	1e+18	1.75	1e+16	60	20	8.30999					1.06	3.75	1e+18	1.75	1e+16	60	20	18.9127
		1.06	3.75	1e+18	1.75	1e+16	60	60	19.4765					1.06	3.76	1e+18	1.75	1e+16	60	60	8.30999					1.06	3.75	1e+18	1.75	1e+16	60	60	18.9127
		1.06	3.75	1e+18	1.75	1e+16	60	100	19.4765					1.06	3.76	1e+18	1.75	1e+16	60	100	8.30999					1.06	3.75	1e+18	1.75	1e+16	60	100	18.9127
		1.06	3.75	1e+18	1.75	1e+16	100	20	20.4395					1.06	3.76	1e+18	1.75	1e+16	100	20	8.55321					1.06	3.75	1e+18	1.75	1e+16	100	20	19.8437
		1.06	3.75	1e+18	1.75	1e+16	100	60	20.4395					1.06	3.76	1e+18	1.75	1e+16	100	60	8.5532					1.06	3.75	1e+18	1.75	1e+16	100	60	19.8437
		1.06	3.75	1e+18	1.75	1e+16	100	100	20.4395					1.06	3.76	1e+18	1.75	1e+16	100	100	8.5532					1.06	3.75	1e+18	1.75	1e+16	100	100	19.8437
		1.06	3.85	1000000000000000	0.75	10000000000000	20	20	22.9334					1.06	3.85	1000000000000000	0.75	10000000000000	20	20	13.9255					1.06	3.85	1000000000000000	0.75	10000000000000	20	20	22.5404
		1.06	3.85	1000000000000000	0.75	10000000000000	20	60	22.9351					1.06	3.85	1000000000000000	0.75	10000000000000	20	60	13.9222					1.06	3.85	1000000000000000	0.75	10000000000000	20	60	22.5429
		1.06	3.85	1000000000000000	0.75	10000000000000	20	100	22.9355					1.06	3.85	1000000000000000	0.75	10000000000000	20	100	13.9216					1.06	3.85	1000000000000000	0.75	10000000000000	20	100	22.5435
		1.06	3.85	1000000000000000	0.75	10000000000000	60	20	22.9685					1.06	3.85	1000000000000000	0.75	10000000000000	60	20	14.2453					1.06	3.85	1000000000000000	0.75	10000000000000	60	20	22.5891
		1.06	3.85	1000000000000000	0.75	10000000000000	60	60	22.9704					1.06	3.85	1000000000000000	0.75	10000000000000	60	60	14.2424					1.06	3.85	1000000000000000	0.75	10000000000000	60	60	22.5919
		1.06	3.85	1000000000000000	0.75	10000000000000	60	100	22.9708					1.06	3.85	1000000000000000	0.75	10000000000000	60	100	14.2418					1.06	3.85	1000000000000000	0.75	10000000000000	60	100	22.5924
		1.06	3.85	1000000000000000	0.75	10000000000000	100	20	22.9756					1.06	3.85	1000000000000000	0.75	10000000000000	100	20	14.313					1.06	3.85	1000000000000000	0.75	10000000000000	100	20	22.5989
		1.06	3.85	1000000000000000	0.75	10000000000000	100	60	22.9776					1.06	3.85	1000000000000000	0.75	10000000000000	100	60	14.3101					1.06	3.85	1000000000000000	0.75	10000000000000	100	60	22.6018
		1.06	3.85	1000000000000000	0.75	10000000000000	100	100	22.978					1.06	3.85	1000000000000000	0.75	10000000000000	100	100	14.3095					1.06	3.85	1000000000000000	0.75	10000000000000	100	100	22.6024
		1.06	3.85	1000000000000000	0.75	100000000000000	20	20	20.6539					1.06	3.85	1000000000000000	0.75	100000000000000	20	20	10.1617					1.06	3.85	1000000000000000	0.75	100000000000000	20	20	20.3999
		1.06	3.85	1000000000000000	0.75	100000000000000	20	60	20.6575					1.06	3.85	1000000000000000	0.75	100000000000000	20	60	10.1603					1.06	3.85	1000000000000000	0.75	100000000000000	20	60	20.4034
		1.06	3.85	1000000000000000	0.75	100000000000000	20	100	20.6582					1.06	3.85	1000000000000000	0.75	100000000000000	20	100	10.16					1.06	3.85	1000000000000000	0.75	100000000000000	20	100	20.4041
		1.06	3.85	1000000000000000	0.75	100000000000000	60	20	20.8318					1.06	3.85	1000000000000000	0.75	100000000000000	60	20	10.669					1.06	3.85	1000000000000000	0.75	100000000000000	60	20	20.6272
		1.06	3.85	1000000000000000	0.75	100000000000000	60	60	20.8362					1.06	3.85	1000000000000000	0.75	100000000000000	60	60	10.6681					1.06	3.85	1000000000000000	0.75	100000000000000	60	60	20.6316
		1.06	3.85	1000000000000000	0.75	100000000000000	60	100	20.8371					1.06	3.85	1000000000000000	0.75	100000000000000	60	100	10.668					1.06	3.85	1000000000000000	0.75	100000000000000	60	100	20.6324
		1.06	3.85	1000000000000000	0.75	100000000000000	100	20	20.8692					1.06	3.85	1000000000000000	0.75	100000000000000	100	20	10.7825					1.06	3.85	1000000000000000	0.75	100000000000000	100	20	20.6755
		1.06	3.85	1000000000000000	0.75	100000000000000	100	60	20.8737					1.06	3.85	1000000000000000	0.75	100000000000000	100	60	10.7818					1.06	3.85	1000000000000000	0.75	100000000000000	100	60	20.6801
		1.06	3.85	1000000000000000	0.75	100000000000000	100	100	20.8746					1.06	3.85	1000000000000000	0.75	100000000000000	100	100	10.7817					1.06	3.85	1000000000000000	0.75	100000000000000	100	100	20.681
		1.06	3.85	1000000000000000	0.75	1000000000000000	20	20	16.2611					1.06	3.85	1000000000000000	0.75	1000000000000000	20	20	4.32814					1.06	3.85	1000000000000000	0.75	1000000000000000	20	20	15.8687
		1.06	3.85	1000000000000000	0.75	1000000000000000	20	60	16.2591					1.06	3.85	1000000000000000	0.75	1000000000000000	20	60	4.32642					1.06	3.85	1000000000000000	0.75	1000000000000000	20	60	15.8665
		1.06	3.85	1000000000000000	0.75	1000000000000000	20	100	16.2586					1.06	3.85	1000000000000000	0.75	1000000000000000	20	100	4.32607					1.06	3.85	1000000000000000	0.75	1000000000000000	20	100	15.8661
		1.06	3.85	1000000000000000	0.75	1000000000000000	60	20	17.4392					1.06	3.85	1000000000000000	0.75	1000000000000000	60	20	5.33105					1.06	3.85	1000000000000000	0.75	1000000000000000	60	20	17.1445
		1.06	3.85	1000000000000000	0.75	1000000000000000	60	60	17.4408					1.06	3.85	1000000000000000	0.75	1000000000000000	60	60	5.33008					1.06	3.85	1000000000000000	0.75	1000000000000000	60	60	17.1458
		1.06	3.85	1000000000000000	0.75	1000000000000000	60	100	17.4411					1.06	3.85	1000000000000000	0.75	1000000000000000	60	100	5.32988					1.06	3.85	1000000000000000	0.75	1000000000000000	60	100	17.146
		1.06	3.85	1000000000000000	0.75	1000000000000000	100	20	17.7134					1.06	3.85	1000000000000000	0.75	1000000000000000	100	20	5.62414					1.06	3.85	1000000000000000	0.75	1000000000000000	100	20	17.4494
		1.06	3.85	1000000000000000	0.75	1000000000000000	100	60	17.7161					1.06	3.85	1000000000000000	0.75	1000000000000000	100	60	5.62358					1.06	3.85	1000000000000000	0.75	1000000000000000	100	60	17.4517
		1.06	3.85	1000000000000000	0.75	1000000000000000	100	100	17.7166					1.06	3.85	1000000000000000	0.75	1000000000000000	100	100	5.62347					1.06	3.85	1000000000000000	0.75	1000000000000000	100	100	17.4521
		1.06	3.85	1000000000000000	0.75	1e+16	20	20	8.77622					1.06	3.85	1000000000000000	0.75	1e+16	20	20	1.54711					1.06	3.85	1000000000000000	0.75	1e+16	20	20	8.72901
		1.06	3.85	1000000000000000	0.75	1e+16	20	60	8.76931					1.06	3.85	1000000000000000	0.75	1e+16	20	60	1.54742					1.06	3.85	1000000000000000	0.75	1e+16	20	60	8.72284
		1.06	3.85	1000000000000000	0.75	1e+16	20	100	8.76793					1.06	3.85	1000000000000000	0.75	1e+16	20	100	1.54749					1.06	3.85	1000000000000000	0.75	1e+16	20	100	8.7216
		1.06	3.85	1000000000000000	0.75	1e+16	60	20	11.542					1.06	3.85	1000000000000000	0.75	1e+16	60	20	1.87727					1.06	3.85	1000000000000000	0.75	1e+16	60	20	11.3811
		1.06	3.85	1000000000000000	0.75	1e+16	60	60	11.5357					1.06	3.85	1000000000000000	0.75	1e+16	60	60	1.87651					1.06	3.85	1000000000000000	0.75	1e+16	60	60	11.3755
		1.06	3.85	1000000000000000	0.75	1e+16	60	100	11.5344					1.06	3.85	1000000000000000	0.75	1e+16	60	100	1.87636					1.06	3.85	1000000000000000	0.75	1e+16	60	100	11.3743
		1.06	3.85	1000000000000000	0.75	1e+16	100	20	12.4874					1.06	3.85	1000000000000000	0.75	1e+16	100	20	2.13632					1.06	3.85	1000000000000000	0.75	1e+16	100	20	12.298
		1.06	3.85	1000000000000000	0.75	1e+16	100	60	12.4824					1.06	3.85	1000000000000000	0.75	1e+16	100	60	2.13564					1.06	3.85	1000000000000000	0.75	1e+16	100	60	12.2935
		1.06	3.85	1000000000000000	0.75	1e+16	100	100	12.4814					1.06	3.85	1000000000000000	0.75	1e+16	100	100	2.1355					1.06	3.85	1000000000000000	0.75	1e+16	100	100	12.2926
		1.06	3.85	1000000000000000	1	10000000000000	20	20	23.8785					1.06	3.85	1000000000000000	1	10000000000000	20	20	14.326					1.06	3.85	1000000000000000	1	10000000000000	20	20	23.4856
		1.06	3.85	1000000000000000	1	10000000000000	20	60	23.8816					1.06	3.85	1000000000000000	1	10000000000000	20	60	14.3211					1.06	3.85	1000000000000000	1	10000000000000	20	60	23.4898
		1.06	3.85	1000000000000000	1	10000000000000	20	100	23.8823					1.06	3.85	1000000000000000	1	10000000000000	20	100	14.3201					1.06	3.85	1000000000000000	1	10000000000000	20	100	23.4907
		1.06	3.85	1000000000000000	1	10000000000000	60	20	23.9206					1.06	3.85	1000000000000000	1	10000000000000	60	20	14.6674					1.06	3.85	1000000000000000	1	10000000000000	60	20	23.5435
		1.06	3.85	1000000000000000	1	10000000000000	60	60	23.924					1.06	3.85	1000000000000000	1	10000000000000	60	60	14.663					1.06	3.85	1000000000000000	1	10000000000000	60	60	23.5483
		1.06	3.85	1000000000000000	1	10000000000000	60	100	23.9247					1.06	3.85	1000000000000000	1	10000000000000	60	100	14.6622					1.06	3.85	1000000000000000	1	10000000000000	60	100	23.5492
		1.06	3.85	1000000000000000	1	10000000000000	100	20	23.9291					1.06	3.85	1000000000000000	1	10000000000000	100	20	14.7398					1.06	3.85	1000000000000000	1	10000000000000	100	20	23.5553
		1.06	3.85	1000000000000000	1	10000000000000	100	60	23.9326					1.06	3.85	1000000000000000	1	10000000000000	100	60	14.7356					1.06	3.85	1000000000000000	1	10000000000000	100	60	23.5602
		1.06	3.85	1000000000000000	1	10000000000000	100	100	23.9333					1.06	3.85	1000000000000000	1	10000000000000	100	100	14.7347					1.06	3.85	1000000000000000	1	10000000000000	100	100	23.5612
		1.06	3.85	1000000000000000	1	100000000000000	20	20	21.0939					1.06	3.85	1000000000000000	1	100000000000000	20	20	9.74379					1.06	3.85	1000000000000000	1	100000000000000	20	20	20.8124
		1.06	3.85	1000000000000000	1	100000000000000	20	60	21.0996					1.06	3.85	1000000000000000	1	100000000000000	20	60	9.74166					1.06	3.85	1000000000000000	1	100000000000000	20	60	20.8177
		1.06	3.85	1000000000000000	1	100000000000000	20	100	21.1007					1.06	3.85	1000000000000000	1	100000000000000	20	100	9.74124					1.06	3.85	1000000000000000	1	100000000000000	20	100	20.8187
		1.06	3.85	1000000000000000	1	100000000000000	60	20	21.3548					1.06	3.85	1000000000000000	1	100000000000000	60	20	10.3317					1.06	3.85	1000000000000000	1	100000000000000	60	20	21.1372
		1.06	3.85	1000000000000000	1	100000000000000	60	60	21.3623					1.06	3.85	1000000000000000	1	100000000000000	60	60	10.3306					1.06	3.85	1000000000000000	1	100000000000000	60	60	21.1445
		1.06	3.85	1000000000000000	1	100000000000000	60	100	21.3638					1.06	3.85	1000000000000000	1	100000000000000	60	100	10.3303					1.06	3.85	1000000000000000	1	100000000000000	60	100	21.1459
		1.06	3.85	1000000000000000	1	100000000000000	100	20	21.4105					1.06	3.85	1000000000000000	1	100000000000000	100	20	10.467					1.06	3.85	1000000000000000	1	100000000000000	100	20	21.2075
		1.06	3.85	1000000000000000	1	100000000000000	100	60	21.4184					1.06	3.85	1000000000000000	1	100000000000000	100	60	10.4661					1.06	3.85	1000000000000000	1	100000000000000	100	60	21.2152
		1.06	3.85	1000000000000000	1	100000000000000	100	100	21.4199					1.06	3.85	1000000000000000	1	100000000000000	100	100	10.466					1.06	3.85	1000000000000000	1	100000000000000	100	100	21.2168
		1.06	3.85	1000000000000000	1	1000000000000000	20	20	15.8634					1.06	3.85	1000000000000000	1	1000000000000000	20	20	3.75803					1.06	3.85	1000000000000000	1	1000000000000000	20	20	15.4485
		1.06	3.85	1000000000000000	1	1000000000000000	20	60	15.8567					1.06	3.85	1000000000000000	1	1000000000000000	20	60	3.75513					1.06	3.85	1000000000000000	1	1000000000000000	20	60	15.442
		1.06	3.85	1000000000000000	1	1000000000000000	20	100	15.8553					1.06	3.85	1000000000000000	1	1000000000000000	20	100	3.75454					1.06	3.85	1000000000000000	1	1000000000000000	20	100	15.4406
		1.06	3.85	1000000000000000	1	1000000000000000	60	20	17.447					1.06	3.85	1000000000000000	1	1000000000000000	60	20	4.80249					1.06	3.85	1000000000000000	1	1000000000000000	60	20	17.1049
		1.06	3.85	1000000000000000	1	1000000000000000	60	60	17.4474					1.06	3.85	1000000000000000	1	1000000000000000	60	60	4.80059					1.06	3.85	1000000000000000	1	1000000000000000	60	60	17.1048
		1.06	3.85	1000000000000000	1	1000000000000000	60	100	17.4474					1.06	3.85	1000000000000000	1	1000000000000000	60	100	4.80021					1.06	3.85	1000000000000000	1	1000000000000000	60	100	17.1048
		1.06	3.85	1000000000000000	1	1000000000000000	100	20	17.8321					1.06	3.85	1000000000000000	1	1000000000000000	100	20	5.12802					1.06	3.85	1000000000000000	1	1000000000000000	100	20	17.5214
		1.06	3.85	1000000000000000	1	1000000000000000	100	60	17.8347					1.06	3.85	1000000000000000	1	1000000000000000	100	60	5.12681					1.06	3.85	1000000000000000	1	1000000000000000	100	60	17.5235
		1.06	3.85	1000000000000000	1	1000000000000000	100	100	17.8353					1.06	3.85	1000000000000000	1	1000000000000000	100	100	5.12657					1.06	3.85	1000000000000000	1	1000000000000000	100	100	17.5239
		1.06	3.85	1000000000000000	1	1e+16	20	20	7.97045					1.06	3.85	1000000000000000	1	1e+16	20	20	1.54097					1.06	3.85	1000000000000000	1	1e+16	20	20	7.97384
		1.06	3.85	1000000000000000	1	1e+16	20	60	7.96091					1.06	3.85	1000000000000000	1	1e+16	20	60	1.54155					1.06	3.85	1000000000000000	1	1e+16	20	60	7.9653
		1.06	3.85	1000000000000000	1	1e+16	20	100	7.959					1.06	3.85	1000000000000000	1	1e+16	20	100	1.54166					1.06	3.85	1000000000000000	1	1e+16	20	100	7.96359
		1.06	3.85	1000000000000000	1	1e+16	60	20	10.7161					1.06	3.85	1000000000000000	1	1e+16	60	20	1.59172					1.06	3.85	1000000000000000	1	1e+16	60	20	10.6108
		1.06	3.85	1000000000000000	1	1e+16	60	60	10.7044					1.06	3.85	1000000000000000	1	1e+16	60	60	1.59076					1.06	3.85	1000000000000000	1	1e+16	60	60	10.6004
		1.06	3.85	1000000000000000	1	1e+16	60	100	10.702					1.06	3.85	1000000000000000	1	1e+16	60	100	1.59057					1.06	3.85	1000000000000000	1	1e+16	60	100	10.5983
		1.06	3.85	1000000000000000	1	1e+16	100	20	11.7847					1.06	3.85	1000000000000000	1	1e+16	100	20	1.81017					1.06	3.85	1000000000000000	1	1e+16	100	20	11.6352
		1.06	3.85	1000000000000000	1	1e+16	100	60	11.7742					1.06	3.85	1000000000000000	1	1e+16	100	60	1.80919					1.06	3.85	1000000000000000	1	1e+16	100	60	11.626
		1.06	3.85	1000000000000000	1	1e+16	100	100	11.7721					1.06	3.85	1000000000000000	1	1e+16	100	100	1.80899					1.06	3.85	1000000000000000	1	1e+16	100	100	11.6242
		1.06	3.85	1000000000000000	1.25	10000000000000	20	20	24.2939					1.06	3.85	1000000000000000	1.25	10000000000000	20	20	14.4268					1.06	3.85	1000000000000000	1.25	10000000000000	20	20	23.9092
		1.06	3.85	1000000000000000	1.25	10000000000000	20	60	24.2986					1.06	3.85	1000000000000000	1.25	10000000000000	20	60	14.4203					1.06	3.85	1000000000000000	1.25	10000000000000	20	60	23.9154
		1.06	3.85	1000000000000000	1.25	10000000000000	20	100	24.2996					1.06	3.85	1000000000000000	1.25	10000000000000	20	100	14.419					1.06	3.85	1000000000000000	1.25	10000000000000	20	100	23.9167
		1.06	3.85	1000000000000000	1.25	10000000000000	60	20	24.3421					1.06	3.85	1000000000000000	1.25	10000000000000	60	20	14.7812					1.06	3.85	1000000000000000	1.25	10000000000000	60	20	23.9755
		1.06	3.85	1000000000000000	1.25	10000000000000	60	60	24.3474					1.06	3.85	1000000000000000	1.25	10000000000000	60	60	14.7755					1.06	3.85	1000000000000000	1.25	10000000000000	60	60	23.9825
		1.06	3.85	1000000000000000	1.25	10000000000000	60	100	24.3484					1.06	3.85	1000000000000000	1.25	10000000000000	60	100	14.7744					1.06	3.85	1000000000000000	1.25	10000000000000	60	100	23.9839
		1.06	3.85	1000000000000000	1.25	10000000000000	100	20	24.3519					1.06	3.85	1000000000000000	1.25	10000000000000	100	20	14.8568					1.06	3.85	1000000000000000	1.25	10000000000000	100	20	23.989
		1.06	3.85	1000000000000000	1.25	10000000000000	100	60	24.3572					1.06	3.85	1000000000000000	1.25	10000000000000	100	60	14.8513					1.06	3.85	1000000000000000	1.25	10000000000000	100	60	23.9962
		1.06	3.85	1000000000000000	1.25	10000000000000	100	100	24.3583					1.06	3.85	1000000000000000	1.25	10000000000000	100	100	14.8502					1.06	3.85	1000000000000000	1.25	10000000000000	100	100	23.9976
		1.06	3.85	1000000000000000	1.25	100000000000000	20	20	21.137					1.06	3.85	1000000000000000	1.25	100000000000000	20	20	9.24499					1.06	3.85	1000000000000000	1.25	100000000000000	20	20	20.8325
		1.06	3.85	1000000000000000	1.25	100000000000000	20	60	21.1444					1.06	3.85	1000000000000000	1.25	100000000000000	20	60	9.24193					1.06	3.85	1000000000000000	1.25	100000000000000	20	60	20.8391
		1.06	3.85	1000000000000000	1.25	100000000000000	20	100	21.1459					1.06	3.85	1000000000000000	1.25	100000000000000	20	100	9.24131					1.06	3.85	1000000000000000	1.25	100000000000000	20	100	20.8404
		1.06	3.85	1000000000000000	1.25	100000000000000	60	20	21.4779					1.06	3.85	1000000000000000	1.25	100000000000000	60	20	9.89904					1.06	3.85	1000000000000000	1.25	100000000000000	60	20	21.2488
		1.06	3.85	1000000000000000	1.25	100000000000000	60	60	21.4885					1.06	3.85	1000000000000000	1.25	100000000000000	60	60	9.89749					1.06	3.85	1000000000000000	1.25	100000000000000	60	60	21.2589
		1.06	3.85	1000000000000000	1.25	100000000000000	60	100	21.4906					1.06	3.85	1000000000000000	1.25	100000000000000	60	100	9.89717					1.06	3.85	1000000000000000	1.25	100000000000000	60	100	21.2609
		1.06	3.85	1000000000000000	1.25	100000000000000	100	20	21.5516					1.06	3.85	1000000000000000	1.25	100000000000000	100	20	10.053					1.06	3.85	1000000000000000	1.25	100000000000000	100	20	21.3402
		1.06	3.85	1000000000000000	1.25	100000000000000	100	60	21.563					1.06	3.85	1000000000000000	1.25	100000000000000	100	60	10.052					1.06	3.85	1000000000000000	1.25	100000000000000	100	60	21.3511
		1.06	3.85	1000000000000000	1.25	100000000000000	100	100	21.5652					1.06	3.85	1000000000000000	1.25	100000000000000	100	100	10.0517					1.06	3.85	1000000000000000	1.25	100000000000000	100	100	21.3533
		1.06	3.85	1000000000000000	1.25	1000000000000000	20	20	15.3135					1.06	3.85	1000000000000000	1.25	1000000000000000	20	20	3.33462					1.06	3.85	1000000000000000	1.25	1000000000000000	20	20	14.8999
		1.06	3.85	1000000000000000	1.25	1000000000000000	20	60	15.3005					1.06	3.85	1000000000000000	1.25	1000000000000000	20	60	3.33063					1.06	3.85	1000000000000000	1.25	1000000000000000	20	60	14.8879
		1.06	3.85	1000000000000000	1.25	1000000000000000	20	100	15.2979					1.06	3.85	1000000000000000	1.25	1000000000000000	20	100	3.32982					1.06	3.85	1000000000000000	1.25	1000000000000000	20	100	14.8854
		1.06	3.85	1000000000000000	1.25	1000000000000000	60	20	17.1873					1.06	3.85	1000000000000000	1.25	1000000000000000	60	20	4.37423					1.06	3.85	1000000000000000	1.25	1000000000000000	60	20	16.832
		1.06	3.85	1000000000000000	1.25	1000000000000000	60	60	17.1847					1.06	3.85	1000000000000000	1.25	1000000000000000	60	60	4.37127					1.06	3.85	1000000000000000	1.25	1000000000000000	60	60	16.8292
		1.06	3.85	1000000000000000	1.25	1000000000000000	60	100	17.1841					1.06	3.85	1000000000000000	1.25	1000000000000000	60	100	4.37067					1.06	3.85	1000000000000000	1.25	1000000000000000	60	100	16.8286
		1.06	3.85	1000000000000000	1.25	1000000000000000	100	20	17.666					1.06	3.85	1000000000000000	1.25	1000000000000000	100	20	4.71575					1.06	3.85	1000000000000000	1.25	1000000000000000	100	20	17.3377
		1.06	3.85	1000000000000000	1.25	1000000000000000	100	60	17.6671					1.06	3.85	1000000000000000	1.25	1000000000000000	100	60	4.71373					1.06	3.85	1000000000000000	1.25	1000000000000000	100	60	17.3384
		1.06	3.85	1000000000000000	1.25	1000000000000000	100	100	17.6673					1.06	3.85	1000000000000000	1.25	1000000000000000	100	100	4.71331					1.06	3.85	1000000000000000	1.25	1000000000000000	100	100	17.3385
		1.06	3.85	1000000000000000	1.25	1e+16	20	20	7.51086					1.06	3.85	1000000000000000	1.25	1e+16	20	20	1.53811					1.06	3.85	1000000000000000	1.25	1e+16	20	20	7.53592
		1.06	3.85	1000000000000000	1.25	1e+16	20	60	7.50052					1.06	3.85	1000000000000000	1.25	1e+16	20	60	1.53895					1.06	3.85	1000000000000000	1.25	1e+16	20	60	7.52674
		1.06	3.85	1000000000000000	1.25	1e+16	20	100	7.49845					1.06	3.85	1000000000000000	1.25	1e+16	20	100	1.53912					1.06	3.85	1000000000000000	1.25	1e+16	20	100	7.52489
		1.06	3.85	1000000000000000	1.25	1e+16	60	20	10.0643					1.06	3.85	1000000000000000	1.25	1e+16	60	20	1.53199					1.06	3.85	1000000000000000	1.25	1e+16	60	20	9.99453
		1.06	3.85	1000000000000000	1.25	1e+16	60	60	10.0483					1.06	3.85	1000000000000000	1.25	1e+16	60	60	1.53289					1.06	3.85	1000000000000000	1.25	1e+16	60	60	9.98039
		1.06	3.85	1000000000000000	1.25	1e+16	60	100	10.0451					1.06	3.85	1000000000000000	1.25	1e+16	60	100	1.53307					1.06	3.85	1000000000000000	1.25	1e+16	60	100	9.97755
		1.06	3.85	1000000000000000	1.25	1e+16	100	20	11.1413					1.06	3.85	1000000000000000	1.25	1e+16	100	20	1.6037					1.06	3.85	1000000000000000	1.25	1e+16	100	20	11.0381
		1.06	3.85	1000000000000000	1.25	1e+16	100	60	11.1257					1.06	3.85	1000000000000000	1.25	1e+16	100	60	1.6026					1.06	3.85	1000000000000000	1.25	1e+16	100	60	11.0244
		1.06	3.85	1000000000000000	1.25	1e+16	100	100	11.1225					1.06	3.85	1000000000000000	1.25	1e+16	100	100	1.60238					1.06	3.85	1000000000000000	1.25	1e+16	100	100	11.0216
		1.06	3.85	1000000000000000	1.5	10000000000000	20	20	24.4627					1.06	3.85	1000000000000000	1.5	10000000000000	20	20	14.3876					1.06	3.85	1000000000000000	1.5	10000000000000	20	20	24.0883
		1.06	3.85	1000000000000000	1.5	10000000000000	20	60	24.4693					1.06	3.85	1000000000000000	1.5	10000000000000	20	60	14.3797					1.06	3.85	1000000000000000	1.5	10000000000000	20	60	24.0967
		1.06	3.85	1000000000000000	1.5	10000000000000	20	100	24.4706					1.06	3.85	1000000000000000	1.5	10000000000000	20	100	14.3781					1.06	3.85	1000000000000000	1.5	10000000000000	20	100	24.0984
		1.06	3.85	1000000000000000	1.5	10000000000000	60	20	24.5168					1.06	3.85	1000000000000000	1.5	10000000000000	60	20	14.7544					1.06	3.85	1000000000000000	1.5	10000000000000	60	20	24.1626
		1.06	3.85	1000000000000000	1.5	10000000000000	60	60	24.5242					1.06	3.85	1000000000000000	1.5	10000000000000	60	60	14.7475					1.06	3.85	1000000000000000	1.5	10000000000000	60	60	24.172
		1.06	3.85	1000000000000000	1.5	10000000000000	60	100	24.5257					1.06	3.85	1000000000000000	1.5	10000000000000	60	100	14.7461					1.06	3.85	1000000000000000	1.5	10000000000000	60	100	24.1739
		1.06	3.85	1000000000000000	1.5	10000000000000	100	20	24.5278					1.06	3.85	1000000000000000	1.5	10000000000000	100	20	14.8326					1.06	3.85	1000000000000000	1.5	10000000000000	100	20	24.1778
		1.06	3.85	1000000000000000	1.5	10000000000000	100	60	24.5354					1.06	3.85	1000000000000000	1.5	10000000000000	100	60	14.8259					1.06	3.85	1000000000000000	1.5	10000000000000	100	60	24.1875
		1.06	3.85	1000000000000000	1.5	10000000000000	100	100	24.5369					1.06	3.85	1000000000000000	1.5	10000000000000	100	100	14.8245					1.06	3.85	1000000000000000	1.5	10000000000000	100	100	24.1894
		1.06	3.85	1000000000000000	1.5	100000000000000	20	20	21.0202					1.06	3.85	1000000000000000	1.5	100000000000000	20	20	8.76081					1.06	3.85	1000000000000000	1.5	100000000000000	20	20	20.6954
		1.06	3.85	1000000000000000	1.5	100000000000000	20	60	21.0288					1.06	3.85	1000000000000000	1.5	100000000000000	20	60	8.75663					1.06	3.85	1000000000000000	1.5	100000000000000	20	60	20.7026
		1.06	3.85	1000000000000000	1.5	100000000000000	20	100	21.0305					1.06	3.85	1000000000000000	1.5	100000000000000	20	100	8.75579					1.06	3.85	1000000000000000	1.5	100000000000000	20	100	20.7041
		1.06	3.85	1000000000000000	1.5	100000000000000	60	20	21.4382					1.06	3.85	1000000000000000	1.5	100000000000000	60	20	9.47124					1.06	3.85	1000000000000000	1.5	100000000000000	60	20	21.2011
		1.06	3.85	1000000000000000	1.5	100000000000000	60	60	21.4517					1.06	3.85	1000000000000000	1.5	100000000000000	60	60	9.46917					1.06	3.85	1000000000000000	1.5	100000000000000	60	60	21.2136
		1.06	3.85	1000000000000000	1.5	100000000000000	60	100	21.4544					1.06	3.85	1000000000000000	1.5	100000000000000	60	100	9.46875					1.06	3.85	1000000000000000	1.5	100000000000000	60	100	21.216
		1.06	3.85	1000000000000000	1.5	100000000000000	100	20	21.5296					1.06	3.85	1000000000000000	1.5	100000000000000	100	20	9.64178					1.06	3.85	1000000000000000	1.5	100000000000000	100	20	21.3135
		1.06	3.85	1000000000000000	1.5	100000000000000	100	60	21.5443					1.06	3.85	1000000000000000	1.5	100000000000000	100	60	9.6404					1.06	3.85	1000000000000000	1.5	100000000000000	100	60	21.3274
		1.06	3.85	1000000000000000	1.5	100000000000000	100	100	21.5472					1.06	3.85	1000000000000000	1.5	100000000000000	100	100	9.64011					1.06	3.85	1000000000000000	1.5	100000000000000	100	100	21.3301
		1.06	3.85	1000000000000000	1.5	1000000000000000	20	20	14.7673					1.06	3.85	1000000000000000	1.5	1000000000000000	20	20	3.01975					1.06	3.85	1000000000000000	1.5	1000000000000000	20	20	14.3706
		1.06	3.85	1000000000000000	1.5	1000000000000000	20	60	14.7476					1.06	3.85	1000000000000000	1.5	1000000000000000	20	60	3.01485					1.06	3.85	1000000000000000	1.5	1000000000000000	20	60	14.3526
		1.06	3.85	1000000000000000	1.5	1000000000000000	20	100	14.7436					1.06	3.85	1000000000000000	1.5	1000000000000000	20	100	3.01386					1.06	3.85	1000000000000000	1.5	1000000000000000	20	100	14.349
		1.06	3.85	1000000000000000	1.5	1000000000000000	60	20	16.8509					1.06	3.85	1000000000000000	1.5	1000000000000000	60	20	4.02773					1.06	3.85	1000000000000000	1.5	1000000000000000	60	20	16.4889
		1.06	3.85	1000000000000000	1.5	1000000000000000	60	60	16.8443					1.06	3.85	1000000000000000	1.5	1000000000000000	60	60	4.0237					1.06	3.85	1000000000000000	1.5	1000000000000000	60	60	16.4825
		1.06	3.85	1000000000000000	1.5	1000000000000000	60	100	16.8429					1.06	3.85	1000000000000000	1.5	1000000000000000	60	100	4.02288					1.06	3.85	1000000000000000	1.5	1000000000000000	60	100	16.4812
		1.06	3.85	1000000000000000	1.5	1000000000000000	100	20	17.4051					1.06	3.85	1000000000000000	1.5	1000000000000000	100	20	4.37442					1.06	3.85	1000000000000000	1.5	1000000000000000	100	20	17.0662
		1.06	3.85	1000000000000000	1.5	1000000000000000	100	60	17.4037					1.06	3.85	1000000000000000	1.5	1000000000000000	100	60	4.37153					1.06	3.85	1000000000000000	1.5	1000000000000000	100	60	17.0647
		1.06	3.85	1000000000000000	1.5	1000000000000000	100	100	17.4034					1.06	3.85	1000000000000000	1.5	1000000000000000	100	100	4.37094					1.06	3.85	1000000000000000	1.5	1000000000000000	100	100	17.0643
		1.06	3.85	1000000000000000	1.5	1e+16	20	20	7.25804					1.06	3.85	1000000000000000	1.5	1e+16	20	20	1.53658					1.06	3.85	1000000000000000	1.5	1e+16	20	20	7.29355
		1.06	3.85	1000000000000000	1.5	1e+16	20	60	7.24825					1.06	3.85	1000000000000000	1.5	1e+16	20	60	1.53766					1.06	3.85	1000000000000000	1.5	1e+16	20	60	7.28505
		1.06	3.85	1000000000000000	1.5	1e+16	20	100	7.24629					1.06	3.85	1000000000000000	1.5	1e+16	20	100	1.53788					1.06	3.85	1000000000000000	1.5	1e+16	20	100	7.28334
		1.06	3.85	1000000000000000	1.5	1e+16	60	20	9.58203					1.06	3.85	1000000000000000	1.5	1e+16	60	20	1.52958					1.06	3.85	1000000000000000	1.5	1e+16	60	20	9.542
		1.06	3.85	1000000000000000	1.5	1e+16	60	60	9.5634					1.06	3.85	1000000000000000	1.5	1e+16	60	60	1.53078					1.06	3.85	1000000000000000	1.5	1e+16	60	60	9.52547
		1.06	3.85	1000000000000000	1.5	1e+16	60	100	9.55966					1.06	3.85	1000000000000000	1.5	1e+16	60	100	1.53102					1.06	3.85	1000000000000000	1.5	1e+16	60	100	9.52214
		1.06	3.85	1000000000000000	1.5	1e+16	100	20	10.6266					1.06	3.85	1000000000000000	1.5	1e+16	100	20	1.52786					1.06	3.85	1000000000000000	1.5	1e+16	100	20	10.5479
		1.06	3.85	1000000000000000	1.5	1e+16	100	60	10.6069					1.06	3.85	1000000000000000	1.5	1e+16	100	60	1.52909					1.06	3.85	1000000000000000	1.5	1e+16	100	60	10.5306
		1.06	3.85	1000000000000000	1.5	1e+16	100	100	10.6029					1.06	3.85	1000000000000000	1.5	1e+16	100	100	1.52933					1.06	3.85	1000000000000000	1.5	1e+16	100	100	10.5271
		1.06	3.85	1000000000000000	1.75	10000000000000	20	20	24.5082					1.06	3.85	1000000000000000	1.75	10000000000000	20	20	14.2809					1.06	3.85	1000000000000000	1.75	10000000000000	20	20	24.1442
		1.06	3.85	1000000000000000	1.75	10000000000000	20	60	24.5169					1.06	3.85	1000000000000000	1.75	10000000000000	20	60	14.2717					1.06	3.85	1000000000000000	1.75	10000000000000	20	60	24.1549
		1.06	3.85	1000000000000000	1.75	10000000000000	20	100	24.5186					1.06	3.85	1000000000000000	1.75	10000000000000	20	100	14.2698					1.06	3.85	1000000000000000	1.75	10000000000000	20	100	24.157
		1.06	3.85	1000000000000000	1.75	10000000000000	60	20	24.5682					1.06	3.85	1000000000000000	1.75	10000000000000	60	20	14.6572					1.06	3.85	1000000000000000	1.75	10000000000000	60	20	24.2262
		1.06	3.85	1000000000000000	1.75	10000000000000	60	60	24.5779					1.06	3.85	1000000000000000	1.75	10000000000000	60	60	14.6492					1.06	3.85	1000000000000000	1.75	10000000000000	60	60	24.2383
		1.06	3.85	1000000000000000	1.75	10000000000000	60	100	24.5799					1.06	3.85	1000000000000000	1.75	10000000000000	60	100	14.6475					1.06	3.85	1000000000000000	1.75	10000000000000	60	100	24.2407
		1.06	3.85	1000000000000000	1.75	10000000000000	100	20	24.5804					1.06	3.85	1000000000000000	1.75	10000000000000	100	20	14.7376					1.06	3.85	1000000000000000	1.75	10000000000000	100	20	24.2431
		1.06	3.85	1000000000000000	1.75	10000000000000	100	60	24.5904					1.06	3.85	1000000000000000	1.75	10000000000000	100	60	14.7298					1.06	3.85	1000000000000000	1.75	10000000000000	100	60	24.2555
		1.06	3.85	1000000000000000	1.75	10000000000000	100	100	24.5923					1.06	3.85	1000000000000000	1.75	10000000000000	100	100	14.7283					1.06	3.85	1000000000000000	1.75	10000000000000	100	100	24.2579
		1.06	3.85	1000000000000000	1.75	100000000000000	20	20	20.8411					1.06	3.85	1000000000000000	1.75	100000000000000	20	20	8.31748					1.06	3.85	1000000000000000	1.75	100000000000000	20	20	20.4952
		1.06	3.85	1000000000000000	1.75	100000000000000	20	60	20.8499					1.06	3.85	1000000000000000	1.75	100000000000000	20	60	8.31206					1.06	3.85	1000000000000000	1.75	100000000000000	20	60	20.5024
		1.06	3.85	1000000000000000	1.75	100000000000000	20	100	20.8517					1.06	3.85	1000000000000000	1.75	100000000000000	20	100	8.31096					1.06	3.85	1000000000000000	1.75	100000000000000	20	100	20.5038
		1.06	3.85	1000000000000000	1.75	100000000000000	60	20	21.335					1.06	3.85	1000000000000000	1.75	100000000000000	60	20	9.07449					1.06	3.85	1000000000000000	1.75	100000000000000	60	20	21.0813
		1.06	3.85	1000000000000000	1.75	100000000000000	60	60	21.3509					1.06	3.85	1000000000000000	1.75	100000000000000	60	60	9.07176					1.06	3.85	1000000000000000	1.75	100000000000000	60	60	21.096
		1.06	3.85	1000000000000000	1.75	100000000000000	60	100	21.354					1.06	3.85	1000000000000000	1.75	100000000000000	60	100	9.07121					1.06	3.85	1000000000000000	1.75	100000000000000	60	100	21.0989
		1.06	3.85	1000000000000000	1.75	100000000000000	100	20	21.4442					1.06	3.85	1000000000000000	1.75	100000000000000	100	20	9.25962					1.06	3.85	1000000000000000	1.75	100000000000000	100	20	21.2131
		1.06	3.85	1000000000000000	1.75	100000000000000	100	60	21.4618					1.06	3.85	1000000000000000	1.75	100000000000000	100	60	9.25783					1.06	3.85	1000000000000000	1.75	100000000000000	100	60	21.2297
		1.06	3.85	1000000000000000	1.75	100000000000000	100	100	21.4653					1.06	3.85	1000000000000000	1.75	100000000000000	100	100	9.25746					1.06	3.85	1000000000000000	1.75	100000000000000	100	100	21.233
		1.06	3.85	1000000000000000	1.75	1000000000000000	20	20	14.2672					1.06	3.85	1000000000000000	1.75	1000000000000000	20	20	2.78379					1.06	3.85	1000000000000000	1.75	1000000000000000	20	20	13.9002
		1.06	3.85	1000000000000000	1.75	1000000000000000	20	60	14.2408					1.06	3.85	1000000000000000	1.75	1000000000000000	20	60	2.77822					1.06	3.85	1000000000000000	1.75	1000000000000000	20	60	13.8765
		1.06	3.85	1000000000000000	1.75	1000000000000000	20	100	14.2354					1.06	3.85	1000000000000000	1.75	1000000000000000	20	100	2.7771					1.06	3.85	1000000000000000	1.75	1000000000000000	20	100	13.8717
		1.06	3.85	1000000000000000	1.75	1000000000000000	60	20	16.5004					1.06	3.85	1000000000000000	1.75	1000000000000000	60	20	3.74926					1.06	3.85	1000000000000000	1.75	1000000000000000	60	20	16.1337
		1.06	3.85	1000000000000000	1.75	1000000000000000	60	60	16.489					1.06	3.85	1000000000000000	1.75	1000000000000000	60	60	3.74421					1.06	3.85	1000000000000000	1.75	1000000000000000	60	60	16.1228
		1.06	3.85	1000000000000000	1.75	1000000000000000	60	100	16.4866					1.06	3.85	1000000000000000	1.75	1000000000000000	60	100	3.74318					1.06	3.85	1000000000000000	1.75	1000000000000000	60	100	16.1206
		1.06	3.85	1000000000000000	1.75	1000000000000000	100	20	17.1157					1.06	3.85	1000000000000000	1.75	1000000000000000	100	20	4.0954					1.06	3.85	1000000000000000	1.75	1000000000000000	100	20	16.7676
		1.06	3.85	1000000000000000	1.75	1000000000000000	100	60	17.111					1.06	3.85	1000000000000000	1.75	1000000000000000	100	60	4.09161					1.06	3.85	1000000000000000	1.75	1000000000000000	100	60	16.7629
		1.06	3.85	1000000000000000	1.75	1000000000000000	100	100	17.11					1.06	3.85	1000000000000000	1.75	1000000000000000	100	100	4.09087					1.06	3.85	1000000000000000	1.75	1000000000000000	100	100	16.7619
		1.06	3.85	1000000000000000	1.75	1e+16	20	20	7.12154					1.06	3.85	1000000000000000	1.75	1e+16	20	20	1.53569					1.06	3.85	1000000000000000	1.75	1e+16	20	20	7.16206
		1.06	3.85	1000000000000000	1.75	1e+16	20	60	7.11313					1.06	3.85	1000000000000000	1.75	1e+16	20	60	1.53698					1.06	3.85	1000000000000000	1.75	1e+16	20	60	7.15507
		1.06	3.85	1000000000000000	1.75	1e+16	20	100	7.11144					1.06	3.85	1000000000000000	1.75	1e+16	20	100	1.53723					1.06	3.85	1000000000000000	1.75	1e+16	20	100	7.15367
		1.06	3.85	1000000000000000	1.75	1e+16	60	20	9.24217					1.06	3.85	1000000000000000	1.75	1e+16	60	20	1.52797					1.06	3.85	1000000000000000	1.75	1e+16	60	20	9.21857
		1.06	3.85	1000000000000000	1.75	1e+16	60	60	9.22235					1.06	3.85	1000000000000000	1.75	1e+16	60	60	1.52946					1.06	3.85	1000000000000000	1.75	1e+16	60	60	9.20105
		1.06	3.85	1000000000000000	1.75	1e+16	60	100	9.21836					1.06	3.85	1000000000000000	1.75	1e+16	60	100	1.52976					1.06	3.85	1000000000000000	1.75	1e+16	60	100	9.19752
		1.06	3.85	1000000000000000	1.75	1e+16	100	20	10.2219					1.06	3.85	1000000000000000	1.75	1e+16	100	20	1.52602					1.06	3.85	1000000000000000	1.75	1e+16	100	20	10.1686
		1.06	3.85	1000000000000000	1.75	1e+16	100	60	10.1995					1.06	3.85	1000000000000000	1.75	1e+16	100	60	1.52756					1.06	3.85	1000000000000000	1.75	1e+16	100	60	10.1488
		1.06	3.85	1000000000000000	1.75	1e+16	100	100	10.195					1.06	3.85	1000000000000000	1.75	1e+16	100	100	1.52787					1.06	3.85	1000000000000000	1.75	1e+16	100	100	10.1448
		1.06	3.85	1e+16	0.75	10000000000000	20	20	23.2436					1.06	3.85	1e+16	0.75	10000000000000	20	20	14.1888					1.06	3.85	1e+16	0.75	10000000000000	20	20	22.8207
		1.06	3.85	1e+16	0.75	10000000000000	20	60	23.244					1.06	3.85	1e+16	0.75	10000000000000	20	60	14.1875					1.06	3.85	1e+16	0.75	10000000000000	20	60	22.8213
		1.06	3.85	1e+16	0.75	10000000000000	20	100	23.244					1.06	3.85	1e+16	0.75	10000000000000	20	100	14.1872					1.06	3.85	1e+16	0.75	10000000000000	20	100	22.8214
		1.06	3.85	1e+16	0.75	10000000000000	60	20	23.2868					1.06	3.85	1e+16	0.75	10000000000000	60	20	14.5162					1.06	3.85	1e+16	0.75	10000000000000	60	20	22.8752
		1.06	3.85	1e+16	0.75	10000000000000	60	60	23.2872					1.06	3.85	1e+16	0.75	10000000000000	60	60	14.5151					1.06	3.85	1e+16	0.75	10000000000000	60	60	22.8758
		1.06	3.85	1e+16	0.75	10000000000000	60	100	23.2873					1.06	3.85	1e+16	0.75	10000000000000	60	100	14.5148					1.06	3.85	1e+16	0.75	10000000000000	60	100	22.8759
		1.06	3.85	1e+16	0.75	10000000000000	100	20	23.2956					1.06	3.85	1e+16	0.75	10000000000000	100	20	14.5854					1.06	3.85	1e+16	0.75	10000000000000	100	20	22.8863
		1.06	3.85	1e+16	0.75	10000000000000	100	60	23.296					1.06	3.85	1e+16	0.75	10000000000000	100	60	14.5843					1.06	3.85	1e+16	0.75	10000000000000	100	60	22.8869
		1.06	3.85	1e+16	0.75	10000000000000	100	100	23.2961					1.06	3.85	1e+16	0.75	10000000000000	100	100	14.5841					1.06	3.85	1e+16	0.75	10000000000000	100	100	22.887
		1.06	3.85	1e+16	0.75	100000000000000	20	20	22.167					1.06	3.85	1e+16	0.75	100000000000000	20	20	11.9154					1.06	3.85	1e+16	0.75	100000000000000	20	20	21.8731
		1.06	3.85	1e+16	0.75	100000000000000	20	60	22.1676					1.06	3.85	1e+16	0.75	100000000000000	20	60	11.9149					1.06	3.85	1e+16	0.75	100000000000000	20	60	21.8738
		1.06	3.85	1e+16	0.75	100000000000000	20	100	22.1677					1.06	3.85	1e+16	0.75	100000000000000	20	100	11.9148					1.06	3.85	1e+16	0.75	100000000000000	20	100	21.8739
		1.06	3.85	1e+16	0.75	100000000000000	60	20	22.2794					1.06	3.85	1e+16	0.75	100000000000000	60	20	12.4048					1.06	3.85	1e+16	0.75	100000000000000	60	20	22.0093
		1.06	3.85	1e+16	0.75	100000000000000	60	60	22.2801					1.06	3.85	1e+16	0.75	100000000000000	60	60	12.4045					1.06	3.85	1e+16	0.75	100000000000000	60	60	22.0101
		1.06	3.85	1e+16	0.75	100000000000000	60	100	22.2802					1.06	3.85	1e+16	0.75	100000000000000	60	100	12.4044					1.06	3.85	1e+16	0.75	100000000000000	60	100	22.0102
		1.06	3.85	1e+16	0.75	100000000000000	100	20	22.3022					1.06	3.85	1e+16	0.75	100000000000000	100	20	12.5112					1.06	3.85	1e+16	0.75	100000000000000	100	20	22.037
		1.06	3.85	1e+16	0.75	100000000000000	100	60	22.3029					1.06	3.85	1e+16	0.75	100000000000000	100	60	12.5109					1.06	3.85	1e+16	0.75	100000000000000	100	60	22.0378
		1.06	3.85	1e+16	0.75	100000000000000	100	100	22.3031					1.06	3.85	1e+16	0.75	100000000000000	100	100	12.5108					1.06	3.85	1e+16	0.75	100000000000000	100	100	22.0379
		1.06	3.85	1e+16	0.75	1000000000000000	20	20	19.446					1.06	3.85	1e+16	0.75	1000000000000000	20	20	7.51045					1.06	3.85	1e+16	0.75	1000000000000000	20	20	19.1634
		1.06	3.85	1e+16	0.75	1000000000000000	20	60	19.4463					1.06	3.85	1e+16	0.75	1000000000000000	20	60	7.51016					1.06	3.85	1e+16	0.75	1000000000000000	20	60	19.1636
		1.06	3.85	1e+16	0.75	1000000000000000	20	100	19.4464					1.06	3.85	1e+16	0.75	1000000000000000	20	100	7.5101					1.06	3.85	1e+16	0.75	1000000000000000	20	100	19.1637
		1.06	3.85	1e+16	0.75	1000000000000000	60	20	20.0159					1.06	3.85	1e+16	0.75	1000000000000000	60	20	8.43966					1.06	3.85	1e+16	0.75	1000000000000000	60	20	19.8091
		1.06	3.85	1e+16	0.75	1000000000000000	60	60	20.0165					1.06	3.85	1e+16	0.75	1000000000000000	60	60	8.43958					1.06	3.85	1e+16	0.75	1000000000000000	60	60	19.8097
		1.06	3.85	1e+16	0.75	1000000000000000	60	100	20.0166					1.06	3.85	1e+16	0.75	1000000000000000	60	100	8.43956					1.06	3.85	1e+16	0.75	1000000000000000	60	100	19.8098
		1.06	3.85	1e+16	0.75	1000000000000000	100	20	20.1363					1.06	3.85	1e+16	0.75	1000000000000000	100	20	8.66748					1.06	3.85	1e+16	0.75	1000000000000000	100	20	19.946
		1.06	3.85	1e+16	0.75	1000000000000000	100	60	20.137					1.06	3.85	1e+16	0.75	1000000000000000	100	60	8.66747					1.06	3.85	1e+16	0.75	1000000000000000	100	60	19.9467
		1.06	3.85	1e+16	0.75	1000000000000000	100	100	20.1371					1.06	3.85	1e+16	0.75	1000000000000000	100	100	8.66747					1.06	3.85	1e+16	0.75	1000000000000000	100	100	19.9468
		1.06	3.85	1e+16	0.75	1e+16	20	20	13.5872					1.06	3.85	1e+16	0.75	1e+16	20	20	3.27726					1.06	3.85	1e+16	0.75	1e+16	20	20	13.3125
		1.06	3.85	1e+16	0.75	1e+16	20	60	13.5863					1.06	3.85	1e+16	0.75	1e+16	20	60	3.27708					1.06	3.85	1e+16	0.75	1e+16	20	60	13.3118
		1.06	3.85	1e+16	0.75	1e+16	20	100	13.5862					1.06	3.85	1e+16	0.75	1e+16	20	100	3.27705					1.06	3.85	1e+16	0.75	1e+16	20	100	13.3116
		1.06	3.85	1e+16	0.75	1e+16	60	20	15.8735					1.06	3.85	1e+16	0.75	1e+16	60	20	4.33229					1.06	3.85	1e+16	0.75	1e+16	60	20	15.6088
		1.06	3.85	1e+16	0.75	1e+16	60	60	15.8733					1.06	3.85	1e+16	0.75	1e+16	60	60	4.33215					1.06	3.85	1e+16	0.75	1e+16	60	60	15.6085
		1.06	3.85	1e+16	0.75	1e+16	60	100	15.8732					1.06	3.85	1e+16	0.75	1e+16	60	100	4.33212					1.06	3.85	1e+16	0.75	1e+16	60	100	15.6084
		1.06	3.85	1e+16	0.75	1e+16	100	20	16.5005					1.06	3.85	1e+16	0.75	1e+16	100	20	4.68997					1.06	3.85	1e+16	0.75	1e+16	100	20	16.248
		1.06	3.85	1e+16	0.75	1e+16	100	60	16.5005					1.06	3.85	1e+16	0.75	1e+16	100	60	4.68988					1.06	3.85	1e+16	0.75	1e+16	100	60	16.2479
		1.06	3.85	1e+16	0.75	1e+16	100	100	16.5005					1.06	3.85	1e+16	0.75	1e+16	100	100	4.68987					1.06	3.85	1e+16	0.75	1e+16	100	100	16.2479
		1.06	3.85	1e+16	1	10000000000000	20	20	24.3094					1.06	3.85	1e+16	1	10000000000000	20	20	14.6858					1.06	3.85	1e+16	1	10000000000000	20	20	23.8812
		1.06	3.85	1e+16	1	10000000000000	20	60	24.31					1.06	3.85	1e+16	1	10000000000000	20	60	14.6838					1.06	3.85	1e+16	1	10000000000000	20	60	23.882
		1.06	3.85	1e+16	1	10000000000000	20	100	24.3101					1.06	3.85	1e+16	1	10000000000000	20	100	14.6834					1.06	3.85	1e+16	1	10000000000000	20	100	23.8822
		1.06	3.85	1e+16	1	10000000000000	60	20	24.3609					1.06	3.85	1e+16	1	10000000000000	60	20	15.0372					1.06	3.85	1e+16	1	10000000000000	60	20	23.9453
		1.06	3.85	1e+16	1	10000000000000	60	60	24.3615					1.06	3.85	1e+16	1	10000000000000	60	60	15.0354					1.06	3.85	1e+16	1	10000000000000	60	60	23.9462
		1.06	3.85	1e+16	1	10000000000000	60	100	24.3617					1.06	3.85	1e+16	1	10000000000000	60	100	15.0351					1.06	3.85	1e+16	1	10000000000000	60	100	23.9464
		1.06	3.85	1e+16	1	10000000000000	100	20	24.3713					1.06	3.85	1e+16	1	10000000000000	100	20	15.1116					1.06	3.85	1e+16	1	10000000000000	100	20	23.9583
		1.06	3.85	1e+16	1	10000000000000	100	60	24.372					1.06	3.85	1e+16	1	10000000000000	100	60	15.1099					1.06	3.85	1e+16	1	10000000000000	100	60	23.9592
		1.06	3.85	1e+16	1	10000000000000	100	100	24.3721					1.06	3.85	1e+16	1	10000000000000	100	100	15.1096					1.06	3.85	1e+16	1	10000000000000	100	100	23.9594
		1.06	3.85	1e+16	1	100000000000000	20	20	22.9647					1.06	3.85	1e+16	1	100000000000000	20	20	11.9063					1.06	3.85	1e+16	1	100000000000000	20	20	22.6705
		1.06	3.85	1e+16	1	100000000000000	20	60	22.9656					1.06	3.85	1e+16	1	100000000000000	20	60	11.9056					1.06	3.85	1e+16	1	100000000000000	20	60	22.6715
		1.06	3.85	1e+16	1	100000000000000	20	100	22.9658					1.06	3.85	1e+16	1	100000000000000	20	100	11.9055					1.06	3.85	1e+16	1	100000000000000	20	100	22.6717
		1.06	3.85	1e+16	1	100000000000000	60	20	23.1173					1.06	3.85	1e+16	1	100000000000000	60	20	12.4681					1.06	3.85	1e+16	1	100000000000000	60	20	22.8531
		1.06	3.85	1e+16	1	100000000000000	60	60	23.1184					1.06	3.85	1e+16	1	100000000000000	60	60	12.4677					1.06	3.85	1e+16	1	100000000000000	60	60	22.8542
		1.06	3.85	1e+16	1	100000000000000	60	100	23.1186					1.06	3.85	1e+16	1	100000000000000	60	100	12.4676					1.06	3.85	1e+16	1	100000000000000	60	100	22.8545
		1.06	3.85	1e+16	1	100000000000000	100	20	23.1483					1.06	3.85	1e+16	1	100000000000000	100	20	12.5914					1.06	3.85	1e+16	1	100000000000000	100	20	22.8903
		1.06	3.85	1e+16	1	100000000000000	100	60	23.1495					1.06	3.85	1e+16	1	100000000000000	100	60	12.591					1.06	3.85	1e+16	1	100000000000000	100	60	22.8915
		1.06	3.85	1e+16	1	100000000000000	100	100	23.1497					1.06	3.85	1e+16	1	100000000000000	100	100	12.591					1.06	3.85	1e+16	1	100000000000000	100	100	22.8918
		1.06	3.85	1e+16	1	1000000000000000	20	20	19.7368					1.06	3.85	1e+16	1	1000000000000000	20	20	7.16511					1.06	3.85	1e+16	1	1000000000000000	20	20	19.4232
		1.06	3.85	1e+16	1	1000000000000000	20	60	19.737					1.06	3.85	1e+16	1	1000000000000000	20	60	7.16463					1.06	3.85	1e+16	1	1000000000000000	20	60	19.4233
		1.06	3.85	1e+16	1	1000000000000000	20	100	19.737					1.06	3.85	1e+16	1	1000000000000000	20	100	7.16453					1.06	3.85	1e+16	1	1000000000000000	20	100	19.4234
		1.06	3.85	1e+16	1	1000000000000000	60	20	20.5326					1.06	3.85	1e+16	1	1000000000000000	60	20	8.20462					1.06	3.85	1e+16	1	1000000000000000	60	20	20.3001
		1.06	3.85	1e+16	1	1000000000000000	60	60	20.5334					1.06	3.85	1e+16	1	1000000000000000	60	60	8.20445					1.06	3.85	1e+16	1	1000000000000000	60	60	20.3009
		1.06	3.85	1e+16	1	1000000000000000	60	100	20.5336					1.06	3.85	1e+16	1	1000000000000000	60	100	8.20442					1.06	3.85	1e+16	1	1000000000000000	60	100	20.301
		1.06	3.85	1e+16	1	1000000000000000	100	20	20.7052					1.06	3.85	1e+16	1	1000000000000000	100	20	8.46778					1.06	3.85	1e+16	1	1000000000000000	100	20	20.4924
		1.06	3.85	1e+16	1	1000000000000000	100	60	20.7062					1.06	3.85	1e+16	1	1000000000000000	100	60	8.46772					1.06	3.85	1e+16	1	1000000000000000	100	60	20.4934
		1.06	3.85	1e+16	1	1000000000000000	100	100	20.7064					1.06	3.85	1e+16	1	1000000000000000	100	100	8.46771					1.06	3.85	1e+16	1	1000000000000000	100	100	20.4936
		1.06	3.85	1e+16	1	1e+16	20	20	13.0814					1.06	3.85	1e+16	1	1e+16	20	20	3.036					1.06	3.85	1e+16	1	1e+16	20	20	12.8301
		1.06	3.85	1e+16	1	1e+16	20	60	13.0801					1.06	3.85	1e+16	1	1e+16	20	60	3.03582					1.06	3.85	1e+16	1	1e+16	20	60	12.829
		1.06	3.85	1e+16	1	1e+16	20	100	13.0799					1.06	3.85	1e+16	1	1e+16	20	100	3.03578					1.06	3.85	1e+16	1	1e+16	20	100	12.8287
		1.06	3.85	1e+16	1	1e+16	60	20	15.6551					1.06	3.85	1e+16	1	1e+16	60	20	4.01689					1.06	3.85	1e+16	1	1e+16	60	20	15.3888
		1.06	3.85	1e+16	1	1e+16	60	60	15.6544					1.06	3.85	1e+16	1	1e+16	60	60	4.01668					1.06	3.85	1e+16	1	1e+16	60	60	15.3881
		1.06	3.85	1e+16	1	1e+16	60	100	15.6542					1.06	3.85	1e+16	1	1e+16	60	100	4.01664					1.06	3.85	1e+16	1	1e+16	60	100	15.388
		1.06	3.85	1e+16	1	1e+16	100	20	16.4523					1.06	3.85	1e+16	1	1e+16	100	20	4.37889					1.06	3.85	1e+16	1	1e+16	100	20	16.189
		1.06	3.85	1e+16	1	1e+16	100	60	16.4519					1.06	3.85	1e+16	1	1e+16	100	60	4.37875					1.06	3.85	1e+16	1	1e+16	100	60	16.1886
		1.06	3.85	1e+16	1	1e+16	100	100	16.4518					1.06	3.85	1e+16	1	1e+16	100	100	4.37872					1.06	3.85	1e+16	1	1e+16	100	100	16.1886
		1.06	3.85	1e+16	1.25	10000000000000	20	20	24.8394					1.06	3.85	1e+16	1.25	10000000000000	20	20	14.8795					1.06	3.85	1e+16	1.25	10000000000000	20	20	24.4136
		1.06	3.85	1e+16	1.25	10000000000000	20	60	24.8402					1.06	3.85	1e+16	1.25	10000000000000	20	60	14.879					1.06	3.85	1e+16	1.25	10000000000000	20	60	24.4148
		1.06	3.85	1e+16	1.25	10000000000000	20	100	24.8404					1.06	3.85	1e+16	1.25	10000000000000	20	100	14.8785					1.06	3.85	1e+16	1.25	10000000000000	20	100	24.415
		1.06	3.85	1e+16	1.25	10000000000000	60	20	24.8974					1.06	3.85	1e+16	1.25	10000000000000	60	20	15.247					1.06	3.85	1e+16	1.25	10000000000000	60	20	24.4854
		1.06	3.85	1e+16	1.25	10000000000000	60	60	24.8984					1.06	3.85	1e+16	1.25	10000000000000	60	60	15.2448					1.06	3.85	1e+16	1.25	10000000000000	60	60	24.4868
		1.06	3.85	1e+16	1.25	10000000000000	60	100	24.8986					1.06	3.85	1e+16	1.25	10000000000000	60	100	15.2443					1.06	3.85	1e+16	1.25	10000000000000	60	100	24.487
		1.06	3.85	1e+16	1.25	10000000000000	100	20	24.9092					1.06	3.85	1e+16	1.25	10000000000000	100	20	15.3251					1.06	3.85	1e+16	1.25	10000000000000	100	20	24.5
		1.06	3.85	1e+16	1.25	10000000000000	100	60	24.9101					1.06	3.85	1e+16	1.25	10000000000000	100	60	15.3229					1.06	3.85	1e+16	1.25	10000000000000	100	60	24.5014
		1.06	3.85	1e+16	1.25	10000000000000	100	100	24.9103					1.06	3.85	1e+16	1.25	10000000000000	100	100	15.3225					1.06	3.85	1e+16	1.25	10000000000000	100	100	24.5016
		1.06	3.85	1e+16	1.25	100000000000000	20	20	23.2821					1.06	3.85	1e+16	1.25	100000000000000	20	20	11.7272					1.06	3.85	1e+16	1.25	100000000000000	20	20	22.99
		1.06	3.85	1e+16	1.25	100000000000000	20	60	23.2834					1.06	3.85	1e+16	1.25	100000000000000	20	60	11.7263					1.06	3.85	1e+16	1.25	100000000000000	20	60	22.9912
		1.06	3.85	1e+16	1.25	100000000000000	20	100	23.2836					1.06	3.85	1e+16	1.25	100000000000000	20	100	11.7261					1.06	3.85	1e+16	1.25	100000000000000	20	100	22.9915
		1.06	3.85	1e+16	1.25	100000000000000	60	20	23.4725					1.06	3.85	1e+16	1.25	100000000000000	60	20	12.3487					1.06	3.85	1e+16	1.25	100000000000000	60	20	23.2154
		1.06	3.85	1e+16	1.25	100000000000000	60	60	23.474					1.06	3.85	1e+16	1.25	100000000000000	60	60	12.3481					1.06	3.85	1e+16	1.25	100000000000000	60	60	23.217
		1.06	3.85	1e+16	1.25	100000000000000	60	100	23.4743					1.06	3.85	1e+16	1.25	100000000000000	60	100	12.348					1.06	3.85	1e+16	1.25	100000000000000	60	100	23.2173
		1.06	3.85	1e+16	1.25	100000000000000	100	20	23.5114					1.06	3.85	1e+16	1.25	100000000000000	100	20	12.4854					1.06	3.85	1e+16	1.25	100000000000000	100	20	23.2617
		1.06	3.85	1e+16	1.25	100000000000000	100	60	23.5129					1.06	3.85	1e+16	1.25	100000000000000	100	60	12.485					1.06	3.85	1e+16	1.25	100000000000000	100	60	23.2633
		1.06	3.85	1e+16	1.25	100000000000000	100	100	23.5132					1.06	3.85	1e+16	1.25	100000000000000	100	100	12.4849					1.06	3.85	1e+16	1.25	100000000000000	100	100	23.2637
		1.06	3.85	1e+16	1.25	1000000000000000	20	20	19.6616					1.06	3.85	1e+16	1.25	1000000000000000	20	20	6.82149					1.06	3.85	1e+16	1.25	1000000000000000	20	20	19.3285
		1.06	3.85	1e+16	1.25	1000000000000000	20	60	19.6615					1.06	3.85	1e+16	1.25	1000000000000000	20	60	6.82081					1.06	3.85	1e+16	1.25	1000000000000000	20	60	19.3283
		1.06	3.85	1e+16	1.25	1000000000000000	20	100	19.6615					1.06	3.85	1e+16	1.25	1000000000000000	20	100	6.82067					1.06	3.85	1e+16	1.25	1000000000000000	20	100	19.3283
		1.06	3.85	1e+16	1.25	1000000000000000	60	20	20.649					1.06	3.85	1e+16	1.25	1000000000000000	60	20	7.91519					1.06	3.85	1e+16	1.25	1000000000000000	60	20	20.4004
		1.06	3.85	1e+16	1.25	1000000000000000	60	60	20.65					1.06	3.85	1e+16	1.25	1000000000000000	60	60	7.91491					1.06	3.85	1e+16	1.25	1000000000000000	60	60	20.4012
		1.06	3.85	1e+16	1.25	1000000000000000	60	100	20.6501					1.06	3.85	1e+16	1.25	1000000000000000	60	100	7.91485					1.06	3.85	1e+16	1.25	1000000000000000	60	100	20.4014
		1.06	3.85	1e+16	1.25	1000000000000000	100	20	20.8697					1.06	3.85	1e+16	1.25	1000000000000000	100	20	8.20165					1.06	3.85	1e+16	1.25	1000000000000000	100	20	20.6426
		1.06	3.85	1e+16	1.25	1000000000000000	100	60	20.8709					1.06	3.85	1e+16	1.25	1000000000000000	100	60	8.20153					1.06	3.85	1e+16	1.25	1000000000000000	100	60	20.6437
		1.06	3.85	1e+16	1.25	1000000000000000	100	100	20.8711					1.06	3.85	1e+16	1.25	1000000000000000	100	100	8.2015					1.06	3.85	1e+16	1.25	1000000000000000	100	100	20.6439
		1.06	3.85	1e+16	1.25	1e+16	20	20	12.6968					1.06	3.85	1e+16	1.25	1e+16	20	20	2.89606					1.06	3.85	1e+16	1.25	1e+16	20	20	12.4605
		1.06	3.85	1e+16	1.25	1e+16	20	60	12.6954					1.06	3.85	1e+16	1.25	1e+16	20	60	2.89594					1.06	3.85	1e+16	1.25	1e+16	20	60	12.4592
		1.06	3.85	1e+16	1.25	1e+16	20	100	12.6951					1.06	3.85	1e+16	1.25	1e+16	20	100	2.89591					1.06	3.85	1e+16	1.25	1e+16	20	100	12.4589
		1.06	3.85	1e+16	1.25	1e+16	60	20	15.282					1.06	3.85	1e+16	1.25	1e+16	60	20	3.77169					1.06	3.85	1e+16	1.25	1e+16	60	20	15.0212
		1.06	3.85	1e+16	1.25	1e+16	60	60	15.2807					1.06	3.85	1e+16	1.25	1e+16	60	60	3.77146					1.06	3.85	1e+16	1.25	1e+16	60	60	15.02
		1.06	3.85	1e+16	1.25	1e+16	60	100	15.2805					1.06	3.85	1e+16	1.25	1e+16	60	100	3.77142					1.06	3.85	1e+16	1.25	1e+16	60	100	15.0198
		1.06	3.85	1e+16	1.25	1e+16	100	20	16.1678					1.06	3.85	1e+16	1.25	1e+16	100	20	4.1147					1.06	3.85	1e+16	1.25	1e+16	100	20	15.9038
		1.06	3.85	1e+16	1.25	1e+16	100	60	16.1669					1.06	3.85	1e+16	1.25	1e+16	100	60	4.11452					1.06	3.85	1e+16	1.25	1e+16	100	60	15.903
		1.06	3.85	1e+16	1.25	1e+16	100	100	16.1667					1.06	3.85	1e+16	1.25	1e+16	100	100	4.11448					1.06	3.85	1e+16	1.25	1e+16	100	100	15.9028
		1.06	3.85	1e+16	1.5	10000000000000	20	20	25.1159					1.06	3.85	1e+16	1.5	10000000000000	20	20	14.9347					1.06	3.85	1e+16	1.5	10000000000000	20	20	24.6955
		1.06	3.85	1e+16	1.5	10000000000000	20	60	25.117					1.06	3.85	1e+16	1.5	10000000000000	20	60	14.9315					1.06	3.85	1e+16	1.5	10000000000000	20	60	24.697
		1.06	3.85	1e+16	1.5	10000000000000	20	100	25.1172					1.06	3.85	1e+16	1.5	10000000000000	20	100	14.9309					1.06	3.85	1e+16	1.5	10000000000000	20	100	24.6973
		1.06	3.85	1e+16	1.5	10000000000000	60	20	25.1795					1.06	3.85	1e+16	1.5	10000000000000	60	20	15.3124					1.06	3.85	1e+16	1.5	10000000000000	60	20	24.7739
		1.06	3.85	1e+16	1.5	10000000000000	60	60	25.1808					1.06	3.85	1e+16	1.5	10000000000000	60	60	15.3097					1.06	3.85	1e+16	1.5	10000000000000	60	60	24.7757
		1.06	3.85	1e+16	1.5	10000000000000	60	100	25.181					1.06	3.85	1e+16	1.5	10000000000000	60	100	15.3091					1.06	3.85	1e+16	1.5	10000000000000	60	100	24.776
		1.06	3.85	1e+16	1.5	10000000000000	100	20	25.1924					1.06	3.85	1e+16	1.5	10000000000000	100	20	15.3932					1.06	3.85	1e+16	1.5	10000000000000	100	20	24.7899
		1.06	3.85	1e+16	1.5	10000000000000	100	60	25.1937					1.06	3.85	1e+16	1.5	10000000000000	100	60	15.3906					1.06	3.85	1e+16	1.5	10000000000000	100	60	24.7916
		1.06	3.85	1e+16	1.5	10000000000000	100	100	25.194					1.06	3.85	1e+16	1.5	10000000000000	100	100	15.39					1.06	3.85	1e+16	1.5	10000000000000	100	100	24.792
		1.06	3.85	1e+16	1.5	100000000000000	20	20	23.3848					1.06	3.85	1e+16	1.5	100000000000000	20	20	11.4935					1.06	3.85	1e+16	1.5	100000000000000	20	20	23.0918
		1.06	3.85	1e+16	1.5	100000000000000	20	60	23.3864					1.06	3.85	1e+16	1.5	100000000000000	20	60	11.4924					1.06	3.85	1e+16	1.5	100000000000000	20	60	23.0934
		1.06	3.85	1e+16	1.5	100000000000000	20	100	23.3867					1.06	3.85	1e+16	1.5	100000000000000	20	100	11.4922					1.06	3.85	1e+16	1.5	100000000000000	20	100	23.0937
		1.06	3.85	1e+16	1.5	100000000000000	60	20	23.6105					1.06	3.85	1e+16	1.5	100000000000000	60	20	12.1599					1.06	3.85	1e+16	1.5	100000000000000	60	20	23.3579
		1.06	3.85	1e+16	1.5	100000000000000	60	60	23.6124					1.06	3.85	1e+16	1.5	100000000000000	60	60	12.1593					1.06	3.85	1e+16	1.5	100000000000000	60	60	23.3598
		1.06	3.85	1e+16	1.5	100000000000000	60	100	23.6128					1.06	3.85	1e+16	1.5	100000000000000	60	100	12.1592					1.06	3.85	1e+16	1.5	100000000000000	60	100	23.3602
		1.06	3.85	1e+16	1.5	100000000000000	100	20	23.6568					1.06	3.85	1e+16	1.5	100000000000000	100	20	12.308					1.06	3.85	1e+16	1.5	100000000000000	100	20	23.4127
		1.06	3.85	1e+16	1.5	100000000000000	100	60	23.6588					1.06	3.85	1e+16	1.5	100000000000000	100	60	12.3075					1.06	3.85	1e+16	1.5	100000000000000	100	60	23.4148
		1.06	3.85	1e+16	1.5	100000000000000	100	100	23.6592					1.06	3.85	1e+16	1.5	100000000000000	100	100	12.3075					1.06	3.85	1e+16	1.5	100000000000000	100	100	23.4152
		1.06	3.85	1e+16	1.5	1000000000000000	20	20	19.4534					1.06	3.85	1e+16	1.5	1000000000000000	20	20	6.51704					1.06	3.85	1e+16	1.5	1000000000000000	20	20	19.1084
		1.06	3.85	1e+16	1.5	1000000000000000	20	60	19.453					1.06	3.85	1e+16	1.5	1000000000000000	20	60	6.51619					1.06	3.85	1e+16	1.5	1000000000000000	20	60	19.1078
		1.06	3.85	1e+16	1.5	1000000000000000	20	100	19.4529					1.06	3.85	1e+16	1.5	1000000000000000	20	100	6.51602					1.06	3.85	1e+16	1.5	1000000000000000	20	100	19.1077
		1.06	3.85	1e+16	1.5	1000000000000000	60	20	20.5962					1.06	3.85	1e+16	1.5	1000000000000000	60	20	7.63796					1.06	3.85	1e+16	1.5	1000000000000000	60	20	20.3357
		1.06	3.85	1e+16	1.5	1000000000000000	60	60	20.5971					1.06	3.85	1e+16	1.5	1000000000000000	60	60	7.63755					1.06	3.85	1e+16	1.5	1000000000000000	60	60	20.3365
		1.06	3.85	1e+16	1.5	1000000000000000	60	100	20.5973					1.06	3.85	1e+16	1.5	1000000000000000	60	100	7.63746					1.06	3.85	1e+16	1.5	1000000000000000	60	100	20.3367
		1.06	3.85	1e+16	1.5	1000000000000000	100	20	20.86					1.06	3.85	1e+16	1.5	1000000000000000	100	20	7.94031					1.06	3.85	1e+16	1.5	1000000000000000	100	20	20.622
		1.06	3.85	1e+16	1.5	1000000000000000	100	60	20.8613					1.06	3.85	1e+16	1.5	1000000000000000	100	60	7.9401					1.06	3.85	1e+16	1.5	1000000000000000	100	60	20.6233
		1.06	3.85	1e+16	1.5	1000000000000000	100	100	20.8616					1.06	3.85	1e+16	1.5	1000000000000000	100	100	7.94005					1.06	3.85	1e+16	1.5	1000000000000000	100	100	20.6235
		1.06	3.85	1e+16	1.5	1e+16	20	20	12.4583					1.06	3.85	1e+16	1.5	1e+16	20	20	2.81927					1.06	3.85	1e+16	1.5	1e+16	20	20	12.2313
		1.06	3.85	1e+16	1.5	1e+16	20	60	12.4569					1.06	3.85	1e+16	1.5	1e+16	20	60	2.81925					1.06	3.85	1e+16	1.5	1e+16	20	60	12.2301
		1.06	3.85	1e+16	1.5	1e+16	20	100	12.4566					1.06	3.85	1e+16	1.5	1e+16	20	100	2.81925					1.06	3.85	1e+16	1.5	1e+16	20	100	12.2299
		1.06	3.85	1e+16	1.5	1e+16	60	20	14.9289					1.06	3.85	1e+16	1.5	1e+16	60	20	3.59606					1.06	3.85	1e+16	1.5	1e+16	60	20	14.676
		1.06	3.85	1e+16	1.5	1e+16	60	60	14.9273					1.06	3.85	1e+16	1.5	1e+16	60	60	3.59586					1.06	3.85	1e+16	1.5	1e+16	60	60	14.6745
		1.06	3.85	1e+16	1.5	1e+16	60	100	14.927					1.06	3.85	1e+16	1.5	1e+16	60	100	3.59583					1.06	3.85	1e+16	1.5	1e+16	60	100	14.6742
		1.06	3.85	1e+16	1.5	1e+16	100	20	15.8405					1.06	3.85	1e+16	1.5	1e+16	100	20	3.90964					1.06	3.85	1e+16	1.5	1e+16	100	20	15.5807
		1.06	3.85	1e+16	1.5	1e+16	100	60	15.8393					1.06	3.85	1e+16	1.5	1e+16	100	60	3.90945					1.06	3.85	1e+16	1.5	1e+16	100	60	15.5795
		1.06	3.85	1e+16	1.5	1e+16	100	100	15.839					1.06	3.85	1e+16	1.5	1e+16	100	100	3.90942					1.06	3.85	1e+16	1.5	1e+16	100	100	15.5793
		1.06	3.85	1e+16	1.75	10000000000000	20	20	25.2623					1.06	3.85	1e+16	1.75	10000000000000	20	20	14.9179					1.06	3.85	1e+16	1.75	10000000000000	20	20	24.8483
		1.06	3.85	1e+16	1.75	10000000000000	20	60	25.2637					1.06	3.85	1e+16	1.75	10000000000000	20	60	14.9142					1.06	3.85	1e+16	1.75	10000000000000	20	60	24.8502
		1.06	3.85	1e+16	1.75	10000000000000	20	100	25.264					1.06	3.85	1e+16	1.75	10000000000000	20	100	14.9135					1.06	3.85	1e+16	1.75	10000000000000	20	100	24.8505
		1.06	3.85	1e+16	1.75	10000000000000	60	20	25.3309					1.06	3.85	1e+16	1.75	10000000000000	60	20	15.3083					1.06	3.85	1e+16	1.75	10000000000000	60	20	24.9327
		1.06	3.85	1e+16	1.75	10000000000000	60	60	25.3326					1.06	3.85	1e+16	1.75	10000000000000	60	60	15.3052					1.06	3.85	1e+16	1.75	10000000000000	60	60	24.9348
		1.06	3.85	1e+16	1.75	10000000000000	60	100	25.3329					1.06	3.85	1e+16	1.75	10000000000000	60	100	15.3046					1.06	3.85	1e+16	1.75	10000000000000	60	100	24.9352
		1.06	3.85	1e+16	1.75	10000000000000	100	20	25.3449					1.06	3.85	1e+16	1.75	10000000000000	100	20	15.3916					1.06	3.85	1e+16	1.75	10000000000000	100	20	24.9498
		1.06	3.85	1e+16	1.75	10000000000000	100	60	25.3465					1.06	3.85	1e+16	1.75	10000000000000	100	60	15.3886					1.06	3.85	1e+16	1.75	10000000000000	100	60	24.952
		1.06	3.85	1e+16	1.75	10000000000000	100	100	25.3469					1.06	3.85	1e+16	1.75	10000000000000	100	100	15.388					1.06	3.85	1e+16	1.75	10000000000000	100	100	24.9524
		1.06	3.85	1e+16	1.75	100000000000000	20	20	23.3838					1.06	3.85	1e+16	1.75	100000000000000	20	20	11.256					1.06	3.85	1e+16	1.75	100000000000000	20	20	23.0928
		1.06	3.85	1e+16	1.75	100000000000000	20	60	23.3856					1.06	3.85	1e+16	1.75	100000000000000	20	60	11.2547					1.06	3.85	1e+16	1.75	100000000000000	20	60	23.0946
		1.06	3.85	1e+16	1.75	100000000000000	20	100	23.3859					1.06	3.85	1e+16	1.75	100000000000000	20	100	11.2544					1.06	3.85	1e+16	1.75	100000000000000	20	100	23.0949
		1.06	3.85	1e+16	1.75	100000000000000	60	20	23.6434					1.06	3.85	1e+16	1.75	100000000000000	60	20	11.9537					1.06	3.85	1e+16	1.75	100000000000000	60	20	23.3959
		1.06	3.85	1e+16	1.75	100000000000000	60	60	23.6457					1.06	3.85	1e+16	1.75	100000000000000	60	60	11.953					1.06	3.85	1e+16	1.75	100000000000000	60	60	23.3983
		1.06	3.85	1e+16	1.75	100000000000000	60	100	23.6462					1.06	3.85	1e+16	1.75	100000000000000	60	100	11.9529					1.06	3.85	1e+16	1.75	100000000000000	60	100	23.3987
		1.06	3.85	1e+16	1.75	100000000000000	100	20	23.6969					1.06	3.85	1e+16	1.75	100000000000000	100	20	12.1112					1.06	3.85	1e+16	1.75	100000000000000	100	20	23.4587
		1.06	3.85	1e+16	1.75	100000000000000	100	60	23.6994					1.06	3.85	1e+16	1.75	100000000000000	100	60	12.1107					1.06	3.85	1e+16	1.75	100000000000000	100	60	23.4612
		1.06	3.85	1e+16	1.75	100000000000000	100	100	23.6999					1.06	3.85	1e+16	1.75	100000000000000	100	100	12.1106					1.06	3.85	1e+16	1.75	100000000000000	100	100	23.4617
		1.06	3.85	1e+16	1.75	1000000000000000	20	20	19.2079					1.06	3.85	1e+16	1.75	1000000000000000	20	20	6.26129					1.06	3.85	1e+16	1.75	1000000000000000	20	20	18.8506
		1.06	3.85	1e+16	1.75	1000000000000000	20	60	19.2071					1.06	3.85	1e+16	1.75	1000000000000000	20	60	6.2603					1.06	3.85	1e+16	1.75	1000000000000000	20	60	18.8497
		1.06	3.85	1e+16	1.75	1000000000000000	20	100	19.207					1.06	3.85	1e+16	1.75	1000000000000000	20	100	6.2601					1.06	3.85	1e+16	1.75	1000000000000000	20	100	18.8496
		1.06	3.85	1e+16	1.75	1000000000000000	60	20	20.4706					1.06	3.85	1e+16	1.75	1000000000000000	60	20	7.38218					1.06	3.85	1e+16	1.75	1000000000000000	60	20	20.1972
		1.06	3.85	1e+16	1.75	1000000000000000	60	60	20.4715					1.06	3.85	1e+16	1.75	1000000000000000	60	60	7.38164					1.06	3.85	1e+16	1.75	1000000000000000	60	60	20.198
		1.06	3.85	1e+16	1.75	1000000000000000	60	100	20.4717					1.06	3.85	1e+16	1.75	1000000000000000	60	100	7.38153					1.06	3.85	1e+16	1.75	1000000000000000	60	100	20.1982
		1.06	3.85	1e+16	1.75	1000000000000000	100	20	20.7722					1.06	3.85	1e+16	1.75	1000000000000000	100	20	7.69379					1.06	3.85	1e+16	1.75	1000000000000000	100	20	20.5255
		1.06	3.85	1e+16	1.75	1000000000000000	100	60	20.7737					1.06	3.85	1e+16	1.75	1000000000000000	100	60	7.69349					1.06	3.85	1e+16	1.75	1000000000000000	100	60	20.5268
		1.06	3.85	1e+16	1.75	1000000000000000	100	100	20.774					1.06	3.85	1e+16	1.75	1000000000000000	100	100	7.69343					1.06	3.85	1e+16	1.75	1000000000000000	100	100	20.5271
		1.06	3.85	1e+16	1.75	1e+16	20	20	12.3225					1.06	3.85	1e+16	1.75	1e+16	20	20	2.77835					1.06	3.85	1e+16	1.75	1e+16	20	20	12.1009
		1.06	3.85	1e+16	1.75	1e+16	20	60	12.3213					1.06	3.85	1e+16	1.75	1e+16	20	60	2.77846					1.06	3.85	1e+16	1.75	1e+16	20	60	12.0999
		1.06	3.85	1e+16	1.75	1e+16	20	100	12.3211					1.06	3.85	1e+16	1.75	1e+16	20	100	2.77848					1.06	3.85	1e+16	1.75	1e+16	20	100	12.0997
		1.06	3.85	1e+16	1.75	1e+16	60	20	14.644					1.06	3.85	1e+16	1.75	1e+16	60	20	3.47078					1.06	3.85	1e+16	1.75	1e+16	60	20	14.3932
		1.06	3.85	1e+16	1.75	1e+16	60	60	14.6422					1.06	3.85	1e+16	1.75	1e+16	60	60	3.47067					1.06	3.85	1e+16	1.75	1e+16	60	60	14.3916
		1.06	3.85	1e+16	1.75	1e+16	60	100	14.6419					1.06	3.85	1e+16	1.75	1e+16	60	100	3.47065					1.06	3.85	1e+16	1.75	1e+16	60	100	14.3913
		1.06	3.85	1e+16	1.75	1e+16	100	20	15.5404					1.06	3.85	1e+16	1.75	1e+16	100	20	3.75047					1.06	3.85	1e+16	1.75	1e+16	100	20	15.2811
		1.06	3.85	1e+16	1.75	1e+16	100	60	15.5388					1.06	3.85	1e+16	1.75	1e+16	100	60	3.75033					1.06	3.85	1e+16	1.75	1e+16	100	60	15.2796
		1.06	3.85	1e+16	1.75	1e+16	100	100	15.5385					1.06	3.85	1e+16	1.75	1e+16	100	100	3.7503					1.06	3.85	1e+16	1.75	1e+16	100	100	15.2793
		1.06	3.85	1e+17	0.75	10000000000000	20	20	23.2856					1.06	3.85	1e+17	0.75	10000000000000	20	20	14.5223					1.06	3.85	1e+17	0.75	10000000000000	20	20	22.8279
		1.06	3.85	1e+17	0.75	10000000000000	20	60	23.2856					1.06	3.85	1e+17	0.75	10000000000000	20	60	14.5221					1.06	3.85	1e+17	0.75	10000000000000	20	60	22.8279
		1.06	3.85	1e+17	0.75	10000000000000	20	100	23.2856					1.06	3.85	1e+17	0.75	10000000000000	20	100	14.522					1.06	3.85	1e+17	0.75	10000000000000	20	100	22.8279
		1.06	3.85	1e+17	0.75	10000000000000	60	20	23.4298					1.06	3.85	1e+17	0.75	10000000000000	60	20	14.8621					1.06	3.85	1e+17	0.75	10000000000000	60	20	22.9816
		1.06	3.85	1e+17	0.75	10000000000000	60	60	23.4299					1.06	3.85	1e+17	0.75	10000000000000	60	60	14.8619					1.06	3.85	1e+17	0.75	10000000000000	60	60	22.9817
		1.06	3.85	1e+17	0.75	10000000000000	60	100	23.4299					1.06	3.85	1e+17	0.75	10000000000000	60	100	14.8619					1.06	3.85	1e+17	0.75	10000000000000	60	100	22.9817
		1.06	3.85	1e+17	0.75	10000000000000	100	20	23.4597					1.06	3.85	1e+17	0.75	10000000000000	100	20	14.9345					1.06	3.85	1e+17	0.75	10000000000000	100	20	23.0134
		1.06	3.85	1e+17	0.75	10000000000000	100	60	23.4597					1.06	3.85	1e+17	0.75	10000000000000	100	60	14.9343					1.06	3.85	1e+17	0.75	10000000000000	100	60	23.0135
		1.06	3.85	1e+17	0.75	10000000000000	100	100	23.4597					1.06	3.85	1e+17	0.75	10000000000000	100	100	14.9343					1.06	3.85	1e+17	0.75	10000000000000	100	100	23.0135
		1.06	3.85	1e+17	0.75	100000000000000	20	20	23.0277					1.06	3.85	1e+17	0.75	100000000000000	20	20	13.9875					1.06	3.85	1e+17	0.75	100000000000000	20	20	22.6145
		1.06	3.85	1e+17	0.75	100000000000000	20	60	23.0278					1.06	3.85	1e+17	0.75	100000000000000	20	60	13.9873					1.06	3.85	1e+17	0.75	100000000000000	20	60	22.6146
		1.06	3.85	1e+17	0.75	100000000000000	20	100	23.0278					1.06	3.85	1e+17	0.75	100000000000000	20	100	13.9873					1.06	3.85	1e+17	0.75	100000000000000	20	100	22.6146
		1.06	3.85	1e+17	0.75	100000000000000	60	20	23.2063					1.06	3.85	1e+17	0.75	100000000000000	60	20	14.3721					1.06	3.85	1e+17	0.75	100000000000000	60	20	22.8032
		1.06	3.85	1e+17	0.75	100000000000000	60	60	23.2063					1.06	3.85	1e+17	0.75	100000000000000	60	60	14.3719					1.06	3.85	1e+17	0.75	100000000000000	60	60	22.8033
		1.06	3.85	1e+17	0.75	100000000000000	60	100	23.2063					1.06	3.85	1e+17	0.75	100000000000000	60	100	14.3719					1.06	3.85	1e+17	0.75	100000000000000	60	100	22.8033
		1.06	3.85	1e+17	0.75	100000000000000	100	20	23.2433					1.06	3.85	1e+17	0.75	100000000000000	100	20	14.4543					1.06	3.85	1e+17	0.75	100000000000000	100	20	22.8423
		1.06	3.85	1e+17	0.75	100000000000000	100	60	23.2433					1.06	3.85	1e+17	0.75	100000000000000	100	60	14.4542					1.06	3.85	1e+17	0.75	100000000000000	100	60	22.8423
		1.06	3.85	1e+17	0.75	100000000000000	100	100	23.2433					1.06	3.85	1e+17	0.75	100000000000000	100	100	14.4542					1.06	3.85	1e+17	0.75	100000000000000	100	100	22.8424
		1.06	3.85	1e+17	0.75	1000000000000000	20	20	21.5519					1.06	3.85	1e+17	0.75	1000000000000000	20	20	11.4545					1.06	3.85	1e+17	0.75	1000000000000000	20	20	21.2762
		1.06	3.85	1e+17	0.75	1000000000000000	20	60	21.5519					1.06	3.85	1e+17	0.75	1000000000000000	20	60	11.4545					1.06	3.85	1e+17	0.75	1000000000000000	20	60	21.2762
		1.06	3.85	1e+17	0.75	1000000000000000	20	100	21.5519					1.06	3.85	1e+17	0.75	1000000000000000	20	100	11.4545					1.06	3.85	1e+17	0.75	1000000000000000	20	100	21.2762
		1.06	3.85	1e+17	0.75	1000000000000000	60	20	22.0214					1.06	3.85	1e+17	0.75	1000000000000000	60	20	12.0936					1.06	3.85	1e+17	0.75	1000000000000000	60	20	21.7625
		1.06	3.85	1e+17	0.75	1000000000000000	60	60	22.0214					1.06	3.85	1e+17	0.75	1000000000000000	60	60	12.0936					1.06	3.85	1e+17	0.75	1000000000000000	60	60	21.7626
		1.06	3.85	1e+17	0.75	1000000000000000	60	100	22.0214					1.06	3.85	1e+17	0.75	1000000000000000	60	100	12.0936					1.06	3.85	1e+17	0.75	1000000000000000	60	100	21.7626
		1.06	3.85	1e+17	0.75	1000000000000000	100	20	22.1206					1.06	3.85	1e+17	0.75	1000000000000000	100	20	12.2356					1.06	3.85	1e+17	0.75	1000000000000000	100	20	21.8655
		1.06	3.85	1e+17	0.75	1000000000000000	100	60	22.1207					1.06	3.85	1e+17	0.75	1000000000000000	100	60	12.2356					1.06	3.85	1e+17	0.75	1000000000000000	100	60	21.8655
		1.06	3.85	1e+17	0.75	1000000000000000	100	100	22.1207					1.06	3.85	1e+17	0.75	1000000000000000	100	100	12.2356					1.06	3.85	1e+17	0.75	1000000000000000	100	100	21.8656
		1.06	3.85	1e+17	0.75	1e+16	20	20	16.763					1.06	3.85	1e+17	0.75	1e+16	20	20	6.79372					1.06	3.85	1e+17	0.75	1e+16	20	20	16.593
		1.06	3.85	1e+17	0.75	1e+16	20	60	16.7629					1.06	3.85	1e+17	0.75	1e+16	20	60	6.79369					1.06	3.85	1e+17	0.75	1e+16	20	60	16.5929
		1.06	3.85	1e+17	0.75	1e+16	20	100	16.7629					1.06	3.85	1e+17	0.75	1e+16	20	100	6.79368					1.06	3.85	1e+17	0.75	1e+16	20	100	16.5929
		1.06	3.85	1e+17	0.75	1e+16	60	20	18.7513					1.06	3.85	1e+17	0.75	1e+16	60	20	7.96416					1.06	3.85	1e+17	0.75	1e+16	60	20	18.5825
		1.06	3.85	1e+17	0.75	1e+16	60	60	18.7513					1.06	3.85	1e+17	0.75	1e+16	60	60	7.96414					1.06	3.85	1e+17	0.75	1e+16	60	60	18.5825
		1.06	3.85	1e+17	0.75	1e+16	60	100	18.7513					1.06	3.85	1e+17	0.75	1e+16	60	100	7.96414					1.06	3.85	1e+17	0.75	1e+16	60	100	18.5825
		1.06	3.85	1e+17	0.75	1e+16	100	20	19.2749					1.06	3.85	1e+17	0.75	1e+16	100	20	8.28979					1.06	3.85	1e+17	0.75	1e+16	100	20	19.1078
		1.06	3.85	1e+17	0.75	1e+16	100	60	19.2749					1.06	3.85	1e+17	0.75	1e+16	100	60	8.28978					1.06	3.85	1e+17	0.75	1e+16	100	60	19.1078
		1.06	3.85	1e+17	0.75	1e+16	100	100	19.2749					1.06	3.85	1e+17	0.75	1e+16	100	100	8.28978					1.06	3.85	1e+17	0.75	1e+16	100	100	19.1078
		1.06	3.85	1e+17	1	10000000000000	20	20	24.4005					1.06	3.85	1e+17	1	10000000000000	20	20	15.1679					1.06	3.85	1e+17	1	10000000000000	20	20	23.9238
		1.06	3.85	1e+17	1	10000000000000	20	60	24.4005					1.06	3.85	1e+17	1	10000000000000	20	60	15.1676					1.06	3.85	1e+17	1	10000000000000	20	60	23.9238
		1.06	3.85	1e+17	1	10000000000000	20	100	24.4005					1.06	3.85	1e+17	1	10000000000000	20	100	15.1675					1.06	3.85	1e+17	1	10000000000000	20	100	23.9238
		1.06	3.85	1e+17	1	10000000000000	60	20	24.5664					1.06	3.85	1e+17	1	10000000000000	60	20	15.5227					1.06	3.85	1e+17	1	10000000000000	60	20	24.1008
		1.06	3.85	1e+17	1	10000000000000	60	60	24.5665					1.06	3.85	1e+17	1	10000000000000	60	60	15.5225					1.06	3.85	1e+17	1	10000000000000	60	60	24.1008
		1.06	3.85	1e+17	1	10000000000000	60	100	24.5665					1.06	3.85	1e+17	1	10000000000000	60	100	15.5224					1.06	3.85	1e+17	1	10000000000000	60	100	24.1009
		1.06	3.85	1e+17	1	10000000000000	100	20	24.6011					1.06	3.85	1e+17	1	10000000000000	100	20	15.5987					1.06	3.85	1e+17	1	10000000000000	100	20	24.1377
		1.06	3.85	1e+17	1	10000000000000	100	60	24.6011					1.06	3.85	1e+17	1	10000000000000	100	60	15.5985					1.06	3.85	1e+17	1	10000000000000	100	60	24.1378
		1.06	3.85	1e+17	1	10000000000000	100	100	24.6011					1.06	3.85	1e+17	1	10000000000000	100	100	15.5984					1.06	3.85	1e+17	1	10000000000000	100	100	24.1378
		1.06	3.85	1e+17	1	100000000000000	20	20	24.0402					1.06	3.85	1e+17	1	100000000000000	20	20	14.4472					1.06	3.85	1e+17	1	100000000000000	20	20	23.6205
		1.06	3.85	1e+17	1	100000000000000	20	60	24.0402					1.06	3.85	1e+17	1	100000000000000	20	60	14.447					1.06	3.85	1e+17	1	100000000000000	20	60	23.6206
		1.06	3.85	1e+17	1	100000000000000	20	100	24.0402					1.06	3.85	1e+17	1	100000000000000	20	100	14.4469					1.06	3.85	1e+17	1	100000000000000	20	100	23.6206
		1.06	3.85	1e+17	1	100000000000000	60	20	24.2598					1.06	3.85	1e+17	1	100000000000000	60	20	14.8627					1.06	3.85	1e+17	1	100000000000000	60	20	23.852
		1.06	3.85	1e+17	1	100000000000000	60	60	24.2599					1.06	3.85	1e+17	1	100000000000000	60	60	14.8626					1.06	3.85	1e+17	1	100000000000000	60	60	23.8521
		1.06	3.85	1e+17	1	100000000000000	60	100	24.2599					1.06	3.85	1e+17	1	100000000000000	60	100	14.8625					1.06	3.85	1e+17	1	100000000000000	60	100	23.8521
		1.06	3.85	1e+17	1	100000000000000	100	20	24.3057					1.06	3.85	1e+17	1	100000000000000	100	20	14.9527					1.06	3.85	1e+17	1	100000000000000	100	20	23.9004
		1.06	3.85	1e+17	1	100000000000000	100	60	24.3058					1.06	3.85	1e+17	1	100000000000000	100	60	14.9525					1.06	3.85	1e+17	1	100000000000000	100	60	23.9005
		1.06	3.85	1e+17	1	100000000000000	100	100	24.3058					1.06	3.85	1e+17	1	100000000000000	100	100	14.9525					1.06	3.85	1e+17	1	100000000000000	100	100	23.9005
		1.06	3.85	1e+17	1	1000000000000000	20	20	22.1232					1.06	3.85	1e+17	1	1000000000000000	20	20	11.4172					1.06	3.85	1e+17	1	1000000000000000	20	20	21.85
		1.06	3.85	1e+17	1	1000000000000000	20	60	22.1232					1.06	3.85	1e+17	1	1000000000000000	20	60	11.4171					1.06	3.85	1e+17	1	1000000000000000	20	60	21.85
		1.06	3.85	1e+17	1	1000000000000000	20	100	22.1232					1.06	3.85	1e+17	1	1000000000000000	20	100	11.4171					1.06	3.85	1e+17	1	1000000000000000	20	100	21.85
		1.06	3.85	1e+17	1	1000000000000000	60	20	22.7759					1.06	3.85	1e+17	1	1000000000000000	60	20	12.1548					1.06	3.85	1e+17	1	1000000000000000	60	20	22.522
		1.06	3.85	1e+17	1	1000000000000000	60	60	22.776					1.06	3.85	1e+17	1	1000000000000000	60	60	12.1547					1.06	3.85	1e+17	1	1000000000000000	60	60	22.5221
		1.06	3.85	1e+17	1	1000000000000000	60	100	22.776					1.06	3.85	1e+17	1	1000000000000000	60	100	12.1547					1.06	3.85	1e+17	1	1000000000000000	60	100	22.5221
		1.06	3.85	1e+17	1	1000000000000000	100	20	22.9178					1.06	3.85	1e+17	1	1000000000000000	100	20	12.3227					1.06	3.85	1e+17	1	1000000000000000	100	20	22.6683
		1.06	3.85	1e+17	1	1000000000000000	100	60	22.9179					1.06	3.85	1e+17	1	1000000000000000	100	60	12.3227					1.06	3.85	1e+17	1	1000000000000000	100	60	22.6684
		1.06	3.85	1e+17	1	1000000000000000	100	100	22.9179					1.06	3.85	1e+17	1	1000000000000000	100	100	12.3227					1.06	3.85	1e+17	1	1000000000000000	100	100	22.6684
		1.06	3.85	1e+17	1	1e+16	20	20	16.4422					1.06	3.85	1e+17	1	1e+16	20	20	6.5184					1.06	3.85	1e+17	1	1e+16	20	20	16.2811
		1.06	3.85	1e+17	1	1e+16	20	60	16.4421					1.06	3.85	1e+17	1	1e+16	20	60	6.51836					1.06	3.85	1e+17	1	1e+16	20	60	16.281
		1.06	3.85	1e+17	1	1e+16	20	100	16.4421					1.06	3.85	1e+17	1	1e+16	20	100	6.51835					1.06	3.85	1e+17	1	1e+16	20	100	16.281
		1.06	3.85	1e+17	1	1e+16	60	20	18.7956					1.06	3.85	1e+17	1	1e+16	60	20	7.70824					1.06	3.85	1e+17	1	1e+16	60	20	18.6248
		1.06	3.85	1e+17	1	1e+16	60	60	18.7956					1.06	3.85	1e+17	1	1e+16	60	60	7.70821					1.06	3.85	1e+17	1	1e+16	60	60	18.6248
		1.06	3.85	1e+17	1	1e+16	60	100	18.7956					1.06	3.85	1e+17	1	1e+16	60	100	7.7082					1.06	3.85	1e+17	1	1e+16	60	100	18.6248
		1.06	3.85	1e+17	1	1e+16	100	20	19.4998					1.06	3.85	1e+17	1	1e+16	100	20	8.07241					1.06	3.85	1e+17	1	1e+16	100	20	19.3268
		1.06	3.85	1e+17	1	1e+16	100	60	19.4998					1.06	3.85	1e+17	1	1e+16	100	60	8.07239					1.06	3.85	1e+17	1	1e+16	100	60	19.3268
		1.06	3.85	1e+17	1	1e+16	100	100	19.4998					1.06	3.85	1e+17	1	1e+16	100	100	8.07239					1.06	3.85	1e+17	1	1e+16	100	100	19.3268
		1.06	3.85	1e+17	1.25	10000000000000	20	20	24.9846					1.06	3.85	1e+17	1.25	10000000000000	20	20	15.5067					1.06	3.85	1e+17	1.25	10000000000000	20	20	24.5028
		1.06	3.85	1e+17	1.25	10000000000000	20	60	24.9846					1.06	3.85	1e+17	1.25	10000000000000	20	60	15.5063					1.06	3.85	1e+17	1.25	10000000000000	20	60	24.5029
		1.06	3.85	1e+17	1.25	10000000000000	20	100	24.9846					1.06	3.85	1e+17	1.25	10000000000000	20	100	15.5062					1.06	3.85	1e+17	1.25	10000000000000	20	100	24.5029
		1.06	3.85	1e+17	1.25	10000000000000	60	20	25.1628					1.06	3.85	1e+17	1.25	10000000000000	60	20	15.865					1.06	3.85	1e+17	1.25	10000000000000	60	20	24.69
		1.06	3.85	1e+17	1.25	10000000000000	60	60	25.1629					1.06	3.85	1e+17	1.25	10000000000000	60	60	15.8646					1.06	3.85	1e+17	1.25	10000000000000	60	60	24.6901
		1.06	3.85	1e+17	1.25	10000000000000	60	100	25.1629					1.06	3.85	1e+17	1.25	10000000000000	60	100	15.8646					1.06	3.85	1e+17	1.25	10000000000000	60	100	24.6901
		1.06	3.85	1e+17	1.25	10000000000000	100	20	25.2004					1.06	3.85	1e+17	1.25	10000000000000	100	20	15.9421					1.06	3.85	1e+17	1.25	10000000000000	100	20	24.7301
		1.06	3.85	1e+17	1.25	10000000000000	100	60	25.2004					1.06	3.85	1e+17	1.25	10000000000000	100	60	15.9418					1.06	3.85	1e+17	1.25	10000000000000	100	60	24.7302
		1.06	3.85	1e+17	1.25	10000000000000	100	100	25.2004					1.06	3.85	1e+17	1.25	10000000000000	100	100	15.9417					1.06	3.85	1e+17	1.25	10000000000000	100	100	24.7303
		1.06	3.85	1e+17	1.25	100000000000000	20	20	24.5277					1.06	3.85	1e+17	1.25	100000000000000	20	20	14.6156					1.06	3.85	1e+17	1.25	100000000000000	20	20	24.1104
		1.06	3.85	1e+17	1.25	100000000000000	20	60	24.5278					1.06	3.85	1e+17	1.25	100000000000000	20	60	14.6153					1.06	3.85	1e+17	1.25	100000000000000	20	60	24.1105
		1.06	3.85	1e+17	1.25	100000000000000	20	100	24.5278					1.06	3.85	1e+17	1.25	100000000000000	20	100	14.6152					1.06	3.85	1e+17	1.25	100000000000000	20	100	24.1105
		1.06	3.85	1e+17	1.25	100000000000000	60	20	24.7793					1.06	3.85	1e+17	1.25	100000000000000	60	20	15.0542					1.06	3.85	1e+17	1.25	100000000000000	60	20	24.3754
		1.06	3.85	1e+17	1.25	100000000000000	60	60	24.7794					1.06	3.85	1e+17	1.25	100000000000000	60	60	15.054					1.06	3.85	1e+17	1.25	100000000000000	60	60	24.3755
		1.06	3.85	1e+17	1.25	100000000000000	60	100	24.7794					1.06	3.85	1e+17	1.25	100000000000000	60	100	15.0539					1.06	3.85	1e+17	1.25	100000000000000	60	100	24.3755
		1.06	3.85	1e+17	1.25	100000000000000	100	20	24.8323					1.06	3.85	1e+17	1.25	100000000000000	100	20	15.1493					1.06	3.85	1e+17	1.25	100000000000000	100	20	24.4312
		1.06	3.85	1e+17	1.25	100000000000000	100	60	24.8324					1.06	3.85	1e+17	1.25	100000000000000	100	60	15.1491					1.06	3.85	1e+17	1.25	100000000000000	100	60	24.4314
		1.06	3.85	1e+17	1.25	100000000000000	100	100	24.8324					1.06	3.85	1e+17	1.25	100000000000000	100	100	15.1491					1.06	3.85	1e+17	1.25	100000000000000	100	100	24.4314
		1.06	3.85	1e+17	1.25	1000000000000000	20	20	22.2403					1.06	3.85	1e+17	1.25	1000000000000000	20	20	11.2294					1.06	3.85	1e+17	1.25	1000000000000000	20	20	21.9727
		1.06	3.85	1e+17	1.25	1000000000000000	20	60	22.2403					1.06	3.85	1e+17	1.25	1000000000000000	20	60	11.2292					1.06	3.85	1e+17	1.25	1000000000000000	20	60	21.9727
		1.06	3.85	1e+17	1.25	1000000000000000	20	100	22.2403					1.06	3.85	1e+17	1.25	1000000000000000	20	100	11.2292					1.06	3.85	1e+17	1.25	1000000000000000	20	100	21.9727
		1.06	3.85	1e+17	1.25	1000000000000000	60	20	23.0502					1.06	3.85	1e+17	1.25	1000000000000000	60	20	12.0375					1.06	3.85	1e+17	1.25	1000000000000000	60	20	22.8034
		1.06	3.85	1e+17	1.25	1000000000000000	60	60	23.0503					1.06	3.85	1e+17	1.25	1000000000000000	60	60	12.0375					1.06	3.85	1e+17	1.25	1000000000000000	60	60	22.8035
		1.06	3.85	1e+17	1.25	1000000000000000	60	100	23.0503					1.06	3.85	1e+17	1.25	1000000000000000	60	100	12.0375					1.06	3.85	1e+17	1.25	1000000000000000	60	100	22.8035
		1.06	3.85	1e+17	1.25	1000000000000000	100	20	23.2318					1.06	3.85	1e+17	1.25	1000000000000000	100	20	12.2254					1.06	3.85	1e+17	1.25	1000000000000000	100	20	22.9899
		1.06	3.85	1e+17	1.25	1000000000000000	100	60	23.232					1.06	3.85	1e+17	1.25	1000000000000000	100	60	12.2253					1.06	3.85	1e+17	1.25	1000000000000000	100	60	22.99
		1.06	3.85	1e+17	1.25	1000000000000000	100	100	23.232					1.06	3.85	1e+17	1.25	1000000000000000	100	100	12.2253					1.06	3.85	1e+17	1.25	1000000000000000	100	100	22.9901
		1.06	3.85	1e+17	1.25	1e+16	20	20	16.1247					1.06	3.85	1e+17	1.25	1e+16	20	20	6.3272					1.06	3.85	1e+17	1.25	1e+16	20	20	15.9712
		1.06	3.85	1e+17	1.25	1e+16	20	60	16.1246					1.06	3.85	1e+17	1.25	1e+16	20	60	6.32717					1.06	3.85	1e+17	1.25	1e+16	20	60	15.971
		1.06	3.85	1e+17	1.25	1e+16	20	100	16.1246					1.06	3.85	1e+17	1.25	1e+16	20	100	6.32717					1.06	3.85	1e+17	1.25	1e+16	20	100	15.971
		1.06	3.85	1e+17	1.25	1e+16	60	20	18.5603					1.06	3.85	1e+17	1.25	1e+16	60	20	7.44308					1.06	3.85	1e+17	1.25	1e+16	60	20	18.3924
		1.06	3.85	1e+17	1.25	1e+16	60	60	18.5602					1.06	3.85	1e+17	1.25	1e+16	60	60	7.44305					1.06	3.85	1e+17	1.25	1e+16	60	60	18.3924
		1.06	3.85	1e+17	1.25	1e+16	60	100	18.5602					1.06	3.85	1e+17	1.25	1e+16	60	100	7.44304					1.06	3.85	1e+17	1.25	1e+16	60	100	18.3923
		1.06	3.85	1e+17	1.25	1e+16	100	20	19.3741					1.06	3.85	1e+17	1.25	1e+16	100	20	7.81119					1.06	3.85	1e+17	1.25	1e+16	100	20	19.2008
		1.06	3.85	1e+17	1.25	1e+16	100	60	19.3741					1.06	3.85	1e+17	1.25	1e+16	100	60	7.81116					1.06	3.85	1e+17	1.25	1e+16	100	60	19.2008
		1.06	3.85	1e+17	1.25	1e+16	100	100	19.3741					1.06	3.85	1e+17	1.25	1e+16	100	100	7.81116					1.06	3.85	1e+17	1.25	1e+16	100	100	19.2008
		1.06	3.85	1e+17	1.5	10000000000000	20	20	25.3177					1.06	3.85	1e+17	1.5	10000000000000	20	20	15.6997					1.06	3.85	1e+17	1.5	10000000000000	20	20	24.8314
		1.06	3.85	1e+17	1.5	10000000000000	20	60	25.3177					1.06	3.85	1e+17	1.5	10000000000000	20	60	15.6992					1.06	3.85	1e+17	1.5	10000000000000	20	60	24.8315
		1.06	3.85	1e+17	1.5	10000000000000	20	100	25.3177					1.06	3.85	1e+17	1.5	10000000000000	20	100	15.6991					1.06	3.85	1e+17	1.5	10000000000000	20	100	24.8315
		1.06	3.85	1e+17	1.5	10000000000000	60	20	25.5025					1.06	3.85	1e+17	1.5	10000000000000	60	20	16.0553					1.06	3.85	1e+17	1.5	10000000000000	60	20	25.0299
		1.06	3.85	1e+17	1.5	10000000000000	60	60	25.5025					1.06	3.85	1e+17	1.5	10000000000000	60	60	16.0548					1.06	3.85	1e+17	1.5	10000000000000	60	60	25.03
		1.06	3.85	1e+17	1.5	10000000000000	60	100	25.5025					1.06	3.85	1e+17	1.5	10000000000000	60	100	16.0547					1.06	3.85	1e+17	1.5	10000000000000	60	100	25.03
		1.06	3.85	1e+17	1.5	10000000000000	100	20	25.5417					1.06	3.85	1e+17	1.5	10000000000000	100	20	16.1323					1.06	3.85	1e+17	1.5	10000000000000	100	20	25.0685
		1.06	3.85	1e+17	1.5	10000000000000	100	60	25.5418					1.06	3.85	1e+17	1.5	10000000000000	100	60	16.1319					1.06	3.85	1e+17	1.5	10000000000000	100	60	25.0687
		1.06	3.85	1e+17	1.5	10000000000000	100	100	25.5418					1.06	3.85	1e+17	1.5	10000000000000	100	100	16.1318					1.06	3.85	1e+17	1.5	10000000000000	100	100	25.0687
		1.06	3.85	1e+17	1.5	100000000000000	20	20	24.7704					1.06	3.85	1e+17	1.5	100000000000000	20	20	14.6536					1.06	3.85	1e+17	1.5	100000000000000	20	20	24.3581
		1.06	3.85	1e+17	1.5	100000000000000	20	60	24.7704					1.06	3.85	1e+17	1.5	100000000000000	20	60	14.6533					1.06	3.85	1e+17	1.5	100000000000000	20	60	24.3582
		1.06	3.85	1e+17	1.5	100000000000000	20	100	24.7704					1.06	3.85	1e+17	1.5	100000000000000	20	100	14.6532					1.06	3.85	1e+17	1.5	100000000000000	20	100	24.3582
		1.06	3.85	1e+17	1.5	100000000000000	60	20	25.0476					1.06	3.85	1e+17	1.5	100000000000000	60	20	15.1054					1.06	3.85	1e+17	1.5	100000000000000	60	20	24.6501
		1.06	3.85	1e+17	1.5	100000000000000	60	60	25.0477					1.06	3.85	1e+17	1.5	100000000000000	60	60	15.1051					1.06	3.85	1e+17	1.5	100000000000000	60	60	24.6503
		1.06	3.85	1e+17	1.5	100000000000000	60	100	25.0477					1.06	3.85	1e+17	1.5	100000000000000	60	100	15.1051					1.06	3.85	1e+17	1.5	100000000000000	60	100	24.6503
		1.06	3.85	1e+17	1.5	100000000000000	100	20	25.1066					1.06	3.85	1e+17	1.5	100000000000000	100	20	15.2041					1.06	3.85	1e+17	1.5	100000000000000	100	20	24.7123
		1.06	3.85	1e+17	1.5	100000000000000	100	60	25.1067					1.06	3.85	1e+17	1.5	100000000000000	100	60	15.2038					1.06	3.85	1e+17	1.5	100000000000000	100	60	24.7124
		1.06	3.85	1e+17	1.5	100000000000000	100	100	25.1067					1.06	3.85	1e+17	1.5	100000000000000	100	100	15.2038					1.06	3.85	1e+17	1.5	100000000000000	100	100	24.7125
		1.06	3.85	1e+17	1.5	1000000000000000	20	20	22.1747					1.06	3.85	1e+17	1.5	1000000000000000	20	20	11.0094					1.06	3.85	1e+17	1.5	1000000000000000	20	20	21.9094
		1.06	3.85	1e+17	1.5	1000000000000000	20	60	22.1747					1.06	3.85	1e+17	1.5	1000000000000000	20	60	11.0093					1.06	3.85	1e+17	1.5	1000000000000000	20	60	21.9094
		1.06	3.85	1e+17	1.5	1000000000000000	20	100	22.1747					1.06	3.85	1e+17	1.5	1000000000000000	20	100	11.0093					1.06	3.85	1e+17	1.5	1000000000000000	20	100	21.9094
		1.06	3.85	1e+17	1.5	1000000000000000	60	20	23.112					1.06	3.85	1e+17	1.5	1000000000000000	60	20	11.8539					1.06	3.85	1e+17	1.5	1000000000000000	60	20	22.869
		1.06	3.85	1e+17	1.5	1000000000000000	60	60	23.1121					1.06	3.85	1e+17	1.5	1000000000000000	60	60	11.8539					1.06	3.85	1e+17	1.5	1000000000000000	60	60	22.8691
		1.06	3.85	1e+17	1.5	1000000000000000	60	100	23.1121					1.06	3.85	1e+17	1.5	1000000000000000	60	100	11.8539					1.06	3.85	1e+17	1.5	1000000000000000	60	100	22.8691
		1.06	3.85	1e+17	1.5	1000000000000000	100	20	23.3297					1.06	3.85	1e+17	1.5	1000000000000000	100	20	12.0558					1.06	3.85	1e+17	1.5	1000000000000000	100	20	23.092
		1.06	3.85	1e+17	1.5	1000000000000000	100	60	23.3298					1.06	3.85	1e+17	1.5	1000000000000000	100	60	12.0557					1.06	3.85	1e+17	1.5	1000000000000000	100	60	23.0922
		1.06	3.85	1e+17	1.5	1000000000000000	100	100	23.3298					1.06	3.85	1e+17	1.5	1000000000000000	100	100	12.0557					1.06	3.85	1e+17	1.5	1000000000000000	100	100	23.0922
		1.06	3.85	1e+17	1.5	1e+16	20	20	15.9117					1.06	3.85	1e+17	1.5	1e+16	20	20	6.21364					1.06	3.85	1e+17	1.5	1e+16	20	20	15.763
		1.06	3.85	1e+17	1.5	1e+16	20	60	15.9115					1.06	3.85	1e+17	1.5	1e+16	20	60	6.21363					1.06	3.85	1e+17	1.5	1e+16	20	60	15.7629
		1.06	3.85	1e+17	1.5	1e+16	20	100	15.9115					1.06	3.85	1e+17	1.5	1e+16	20	100	6.21362					1.06	3.85	1e+17	1.5	1e+16	20	100	15.7629
		1.06	3.85	1e+17	1.5	1e+16	60	20	18.2823					1.06	3.85	1e+17	1.5	1e+16	60	20	7.22602					1.06	3.85	1e+17	1.5	1e+16	60	20	18.1186
		1.06	3.85	1e+17	1.5	1e+16	60	60	18.2822					1.06	3.85	1e+17	1.5	1e+16	60	60	7.22598					1.06	3.85	1e+17	1.5	1e+16	60	60	18.1185
		1.06	3.85	1e+17	1.5	1e+16	60	100	18.2822					1.06	3.85	1e+17	1.5	1e+16	60	100	7.22597					1.06	3.85	1e+17	1.5	1e+16	60	100	18.1184
		1.06	3.85	1e+17	1.5	1e+16	100	20	19.1438					1.06	3.85	1e+17	1.5	1e+16	100	20	7.57575					1.06	3.85	1e+17	1.5	1e+16	100	20	18.9725
		1.06	3.85	1e+17	1.5	1e+16	100	60	19.1437					1.06	3.85	1e+17	1.5	1e+16	100	60	7.57572					1.06	3.85	1e+17	1.5	1e+16	100	60	18.9724
		1.06	3.85	1e+17	1.5	1e+16	100	100	19.1437					1.06	3.85	1e+17	1.5	1e+16	100	100	7.57572					1.06	3.85	1e+17	1.5	1e+16	100	100	18.9724
		1.06	3.85	1e+17	1.75	10000000000000	20	20	25.5215					1.06	3.85	1e+17	1.75	10000000000000	20	20	15.8174					1.06	3.85	1e+17	1.75	10000000000000	20	20	25.0326
		1.06	3.85	1e+17	1.75	10000000000000	20	60	25.5215					1.06	3.85	1e+17	1.75	10000000000000	20	60	15.8168					1.06	3.85	1e+17	1.75	10000000000000	20	60	25.0326
		1.06	3.85	1e+17	1.75	10000000000000	20	100	25.5215					1.06	3.85	1e+17	1.75	10000000000000	20	100	15.8166					1.06	3.85	1e+17	1.75	10000000000000	20	100	25.0327
		1.06	3.85	1e+17	1.75	10000000000000	60	20	25.7092					1.06	3.85	1e+17	1.75	10000000000000	60	20	16.1668					1.06	3.85	1e+17	1.75	10000000000000	60	20	25.2351
		1.06	3.85	1e+17	1.75	10000000000000	60	60	25.7093					1.06	3.85	1e+17	1.75	10000000000000	60	60	16.1663					1.06	3.85	1e+17	1.75	10000000000000	60	60	25.2353
		1.06	3.85	1e+17	1.75	10000000000000	60	100	25.7093					1.06	3.85	1e+17	1.75	10000000000000	60	100	16.1662					1.06	3.85	1e+17	1.75	10000000000000	60	100	25.2353
		1.06	3.85	1e+17	1.75	10000000000000	100	20	25.7494					1.06	3.85	1e+17	1.75	10000000000000	100	20	16.2429					1.06	3.85	1e+17	1.75	10000000000000	100	20	25.2784
		1.06	3.85	1e+17	1.75	10000000000000	100	60	25.7495					1.06	3.85	1e+17	1.75	10000000000000	100	60	16.2424					1.06	3.85	1e+17	1.75	10000000000000	100	60	25.2786
		1.06	3.85	1e+17	1.75	10000000000000	100	100	25.7495					1.06	3.85	1e+17	1.75	10000000000000	100	100	16.2423					1.06	3.85	1e+17	1.75	10000000000000	100	100	25.2787
		1.06	3.85	1e+17	1.75	100000000000000	20	20	24.8894					1.06	3.85	1e+17	1.75	100000000000000	20	20	14.6298					1.06	3.85	1e+17	1.75	100000000000000	20	20	24.4829
		1.06	3.85	1e+17	1.75	100000000000000	20	60	24.8894					1.06	3.85	1e+17	1.75	100000000000000	20	60	14.6295					1.06	3.85	1e+17	1.75	100000000000000	20	60	24.483
		1.06	3.85	1e+17	1.75	100000000000000	20	100	24.8894					1.06	3.85	1e+17	1.75	100000000000000	20	100	14.6294					1.06	3.85	1e+17	1.75	100000000000000	20	100	24.483
		1.06	3.85	1e+17	1.75	100000000000000	60	20	25.1878					1.06	3.85	1e+17	1.75	100000000000000	60	20	15.0897					1.06	3.85	1e+17	1.75	100000000000000	60	20	24.7974
		1.06	3.85	1e+17	1.75	100000000000000	60	60	25.1879					1.06	3.85	1e+17	1.75	100000000000000	60	60	15.0894					1.06	3.85	1e+17	1.75	100000000000000	60	60	24.7976
		1.06	3.85	1e+17	1.75	100000000000000	60	100	25.1879					1.06	3.85	1e+17	1.75	100000000000000	60	100	15.0893					1.06	3.85	1e+17	1.75	100000000000000	60	100	24.7976
		1.06	3.85	1e+17	1.75	100000000000000	100	20	25.2519					1.06	3.85	1e+17	1.75	100000000000000	100	20	15.1908					1.06	3.85	1e+17	1.75	100000000000000	100	20	24.865
		1.06	3.85	1e+17	1.75	100000000000000	100	60	25.2521					1.06	3.85	1e+17	1.75	100000000000000	100	60	15.1905					1.06	3.85	1e+17	1.75	100000000000000	100	60	24.8652
		1.06	3.85	1e+17	1.75	100000000000000	100	100	25.2521					1.06	3.85	1e+17	1.75	100000000000000	100	100	15.1905					1.06	3.85	1e+17	1.75	100000000000000	100	100	24.8652
		1.06	3.85	1e+17	1.75	1000000000000000	20	20	22.0382					1.06	3.85	1e+17	1.75	1000000000000000	20	20	10.7995					1.06	3.85	1e+17	1.75	1000000000000000	20	20	21.7797
		1.06	3.85	1e+17	1.75	1000000000000000	20	60	22.0382					1.06	3.85	1e+17	1.75	1000000000000000	20	60	10.7993					1.06	3.85	1e+17	1.75	1000000000000000	20	60	21.7796
		1.06	3.85	1e+17	1.75	1000000000000000	20	100	22.0381					1.06	3.85	1e+17	1.75	1000000000000000	20	100	10.7993					1.06	3.85	1e+17	1.75	1000000000000000	20	100	21.7796
		1.06	3.85	1e+17	1.75	1000000000000000	60	20	23.074					1.06	3.85	1e+17	1.75	1000000000000000	60	20	11.6574					1.06	3.85	1e+17	1.75	1000000000000000	60	20	22.8379
		1.06	3.85	1e+17	1.75	1000000000000000	60	60	23.0741					1.06	3.85	1e+17	1.75	1000000000000000	60	60	11.6573					1.06	3.85	1e+17	1.75	1000000000000000	60	60	22.838
		1.06	3.85	1e+17	1.75	1000000000000000	60	100	23.0741					1.06	3.85	1e+17	1.75	1000000000000000	60	100	11.6573					1.06	3.85	1e+17	1.75	1000000000000000	60	100	22.8381
		1.06	3.85	1e+17	1.75	1000000000000000	100	20	23.3236					1.06	3.85	1e+17	1.75	1000000000000000	100	20	11.8685					1.06	3.85	1e+17	1.75	1000000000000000	100	20	23.093
		1.06	3.85	1e+17	1.75	1000000000000000	100	60	23.3237					1.06	3.85	1e+17	1.75	1000000000000000	100	60	11.8684					1.06	3.85	1e+17	1.75	1000000000000000	100	60	23.0932
		1.06	3.85	1e+17	1.75	1000000000000000	100	100	23.3238					1.06	3.85	1e+17	1.75	1000000000000000	100	100	11.8684					1.06	3.85	1e+17	1.75	1000000000000000	100	100	23.0932
		1.06	3.85	1e+17	1.75	1e+16	20	20	15.7865					1.06	3.85	1e+17	1.75	1e+16	20	20	6.15066					1.06	3.85	1e+17	1.75	1e+16	20	20	15.6408
		1.06	3.85	1e+17	1.75	1e+16	20	60	15.7865					1.06	3.85	1e+17	1.75	1e+16	20	60	6.15067					1.06	3.85	1e+17	1.75	1e+16	20	60	15.6407
		1.06	3.85	1e+17	1.75	1e+16	20	100	15.7864					1.06	3.85	1e+17	1.75	1e+16	20	100	6.15067					1.06	3.85	1e+17	1.75	1e+16	20	100	15.6407
		1.06	3.85	1e+17	1.75	1e+16	60	20	18.0395					1.06	3.85	1e+17	1.75	1e+16	60	20	7.06275					1.06	3.85	1e+17	1.75	1e+16	60	20	17.8796
		1.06	3.85	1e+17	1.75	1e+16	60	60	18.0394					1.06	3.85	1e+17	1.75	1e+16	60	60	7.06272					1.06	3.85	1e+17	1.75	1e+16	60	60	17.8795
		1.06	3.85	1e+17	1.75	1e+16	60	100	18.0394					1.06	3.85	1e+17	1.75	1e+16	60	100	7.06272					1.06	3.85	1e+17	1.75	1e+16	60	100	17.8795
		1.06	3.85	1e+17	1.75	1e+16	100	20	18.9047					1.06	3.85	1e+17	1.75	1e+16	100	20	7.38545					1.06	3.85	1e+17	1.75	1e+16	100	20	18.7361
		1.06	3.85	1e+17	1.75	1e+16	100	60	18.9046					1.06	3.85	1e+17	1.75	1e+16	100	60	7.38542					1.06	3.85	1e+17	1.75	1e+16	100	60	18.736
		1.06	3.85	1e+17	1.75	1e+16	100	100	18.9046					1.06	3.85	1e+17	1.75	1e+16	100	100	7.38541					1.06	3.85	1e+17	1.75	1e+16	100	100	18.736
		1.06	3.85	1e+18	0.75	10000000000000	20	20	22.1836					1.06	3.85	1e+18	0.75	10000000000000	20	20	14.2206					1.06	3.85	1e+18	0.75	10000000000000	20	20	21.7395
		1.06	3.85	1e+18	0.75	10000000000000	20	60	22.1836					1.06	3.85	1e+18	0.75	10000000000000	20	60	14.2206					1.06	3.85	1e+18	0.75	10000000000000	20	60	21.7395
		1.06	3.85	1e+18	0.75	10000000000000	20	100	22.1836					1.06	3.85	1e+18	0.75	10000000000000	20	100	14.2206					1.06	3.85	1e+18	0.75	10000000000000	20	100	21.7395
		1.06	3.85	1e+18	0.75	10000000000000	60	20	23.0486					1.06	3.85	1e+18	0.75	10000000000000	60	20	14.7375					1.06	3.85	1e+18	0.75	10000000000000	60	20	22.6167
		1.06	3.85	1e+18	0.75	10000000000000	60	60	23.0486					1.06	3.85	1e+18	0.75	10000000000000	60	60	14.7375					1.06	3.85	1e+18	0.75	10000000000000	60	60	22.6167
		1.06	3.85	1e+18	0.75	10000000000000	60	100	23.0486					1.06	3.85	1e+18	0.75	10000000000000	60	100	14.7375					1.06	3.85	1e+18	0.75	10000000000000	60	100	22.6167
		1.06	3.85	1e+18	0.75	10000000000000	100	20	23.2658					1.06	3.85	1e+18	0.75	10000000000000	100	20	14.8681					1.06	3.85	1e+18	0.75	10000000000000	100	20	22.834
		1.06	3.85	1e+18	0.75	10000000000000	100	60	23.2658					1.06	3.85	1e+18	0.75	10000000000000	100	60	14.8681					1.06	3.85	1e+18	0.75	10000000000000	100	60	22.834
		1.06	3.85	1e+18	0.75	10000000000000	100	100	23.2658					1.06	3.85	1e+18	0.75	10000000000000	100	100	14.8681					1.06	3.85	1e+18	0.75	10000000000000	100	100	22.834
		1.06	3.85	1e+18	0.75	100000000000000	20	20	22.1243					1.06	3.85	1e+18	0.75	100000000000000	20	20	14.1416					1.06	3.85	1e+18	0.75	100000000000000	20	20	21.687
		1.06	3.85	1e+18	0.75	100000000000000	20	60	22.1243					1.06	3.85	1e+18	0.75	100000000000000	20	60	14.1416					1.06	3.85	1e+18	0.75	100000000000000	20	60	21.687
[truncated: 12,409 more rows]
