# Supplementary figures and images for: First-principles investigation and device simulation of TlPbI3-based perovskite solar cells with machine learning-driven efficiency prediction
Source: Royal Society of Chemistry journal article supplement (doi:10.1039/d6ra01288d), 2026-04-07

## Machine Learning Pipeline Workflow

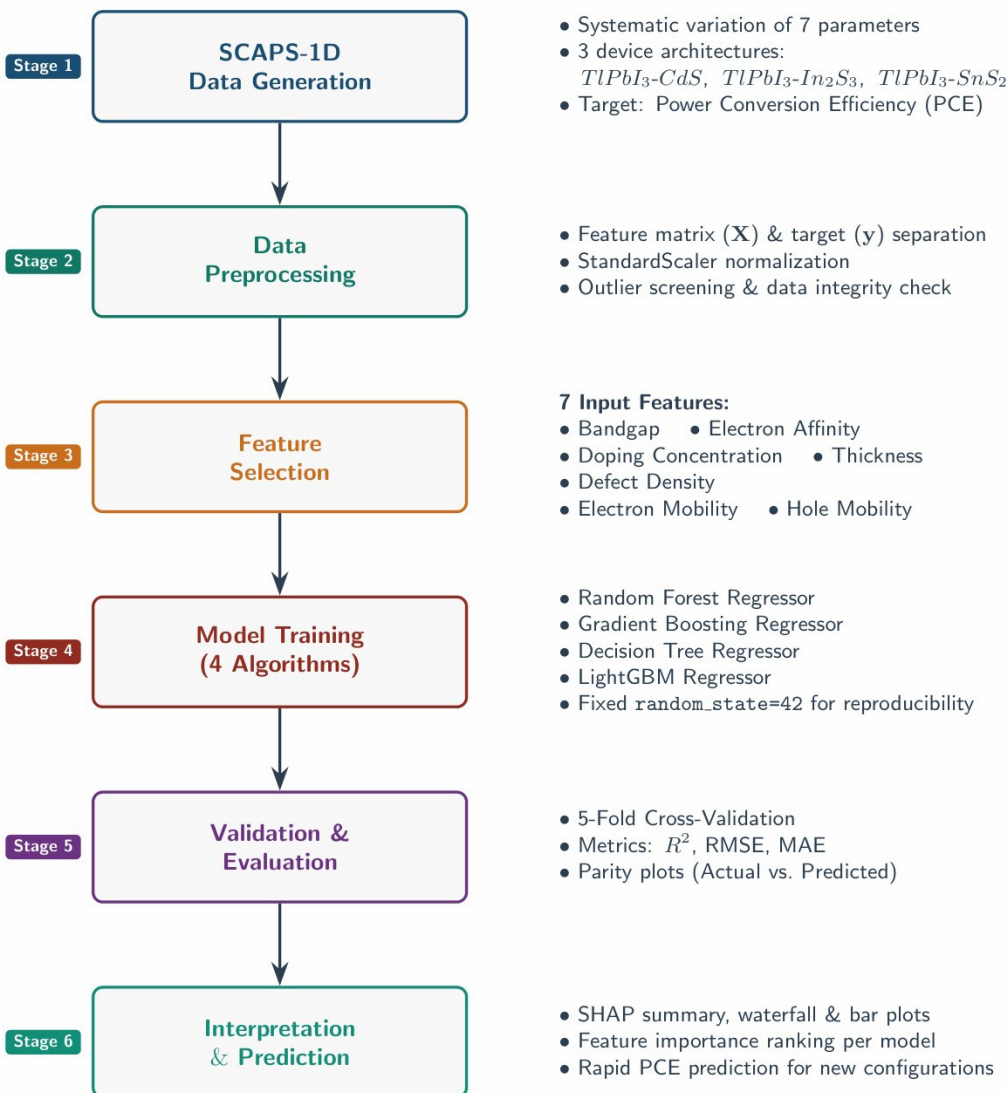

Supplement: d6ra01288d3.pdf [file d6ra01288d3.pdf]
